# Supplementary material for: Genome-wide hydroxymethylcytosine pattern changes in response to oxidative stress
Source: PubMed Central journal article supplement (PMC4523844; doi:10.1038/srep12714), 2015-08-04
Supplement: srep12714-s1.pdf [file srep12714-s1.pdf]

## **Genome-wide hydroxymethylcytosine pattern changes in response to oxidative stress**

**Benjamin Delatte<sup>1,\*</sup>, Jana Jeschke<sup>1</sup>, Matthieu Defrance<sup>1</sup>, Martin Bachman<sup>2</sup>, Catherine Creppe<sup>1</sup>, Emilie Calonne<sup>1</sup>, Martin Bizet<sup>1</sup>, Rachel Deplus<sup>1</sup>, Laura Marroqui<sup>3</sup>, Myriam Libin<sup>4</sup>, Mirunalini Ravichandran<sup>5</sup>, Françoise Mascart<sup>4</sup>, Decio L. Eizirik<sup>3</sup>, Adele Murrell<sup>2</sup>, Tomasz P. Jurkowski<sup>5</sup> & François Fuks<sup>1,\*</sup>**

<sup>1</sup>Laboratory of Cancer Epigenetics, Faculty of Medicine, ULB, 1070 Brussels, Belgium.

<sup>2</sup> CRUK Cambridge Institute, University of Cambridge, Cambridge CB2 0RE, United Kingdom.

<sup>3</sup>ULB, Center for Diabetes Research, Faculty of Medicine, ULB, 1070 Brussels, Belgium.

<sup>4</sup>Laboratory of Vaccinology and Mucosal Immunity, Faculty of Medicine, ULB, 1070 Brussels, Belgium.

<sup>5</sup>Institute of Biochemistry, Stuttgart University, 70569 Stuttgart, Germany.

\* Corresponding authors:

Benjamin Delatte: Tel: 32-2-555.60.16; E-mail: benche65@gmail.com

François Fuks: Tel: 32-2-555.62.45; Fax: 32-2-555.62.57. E-mail: ffuks@ulb.ac.be

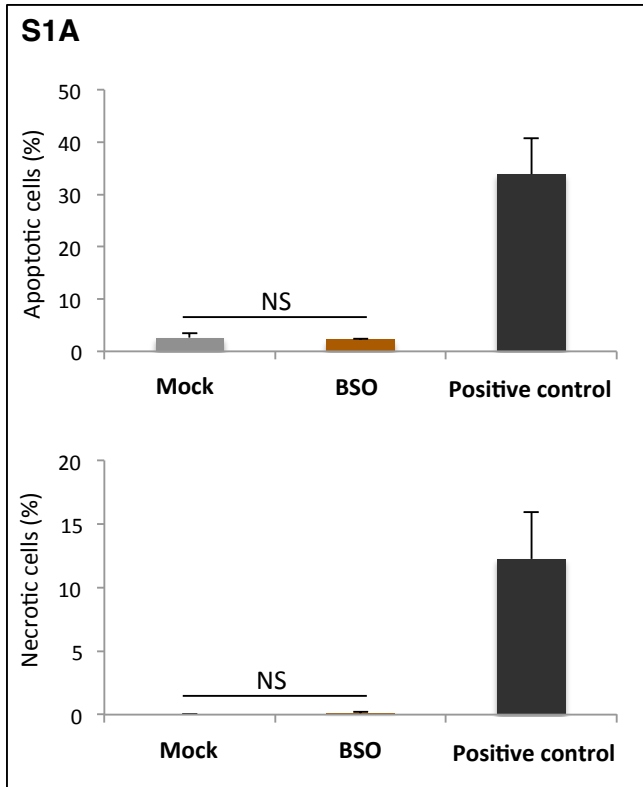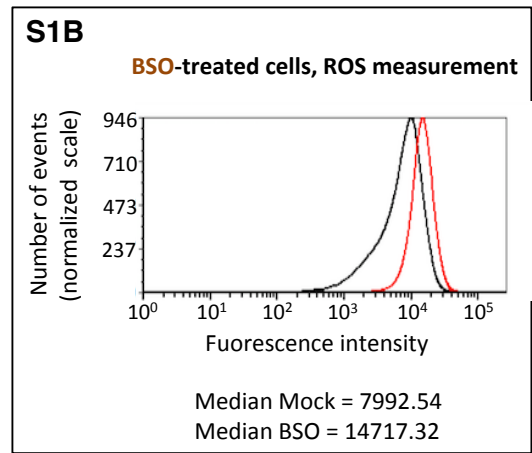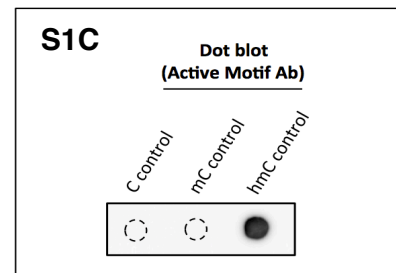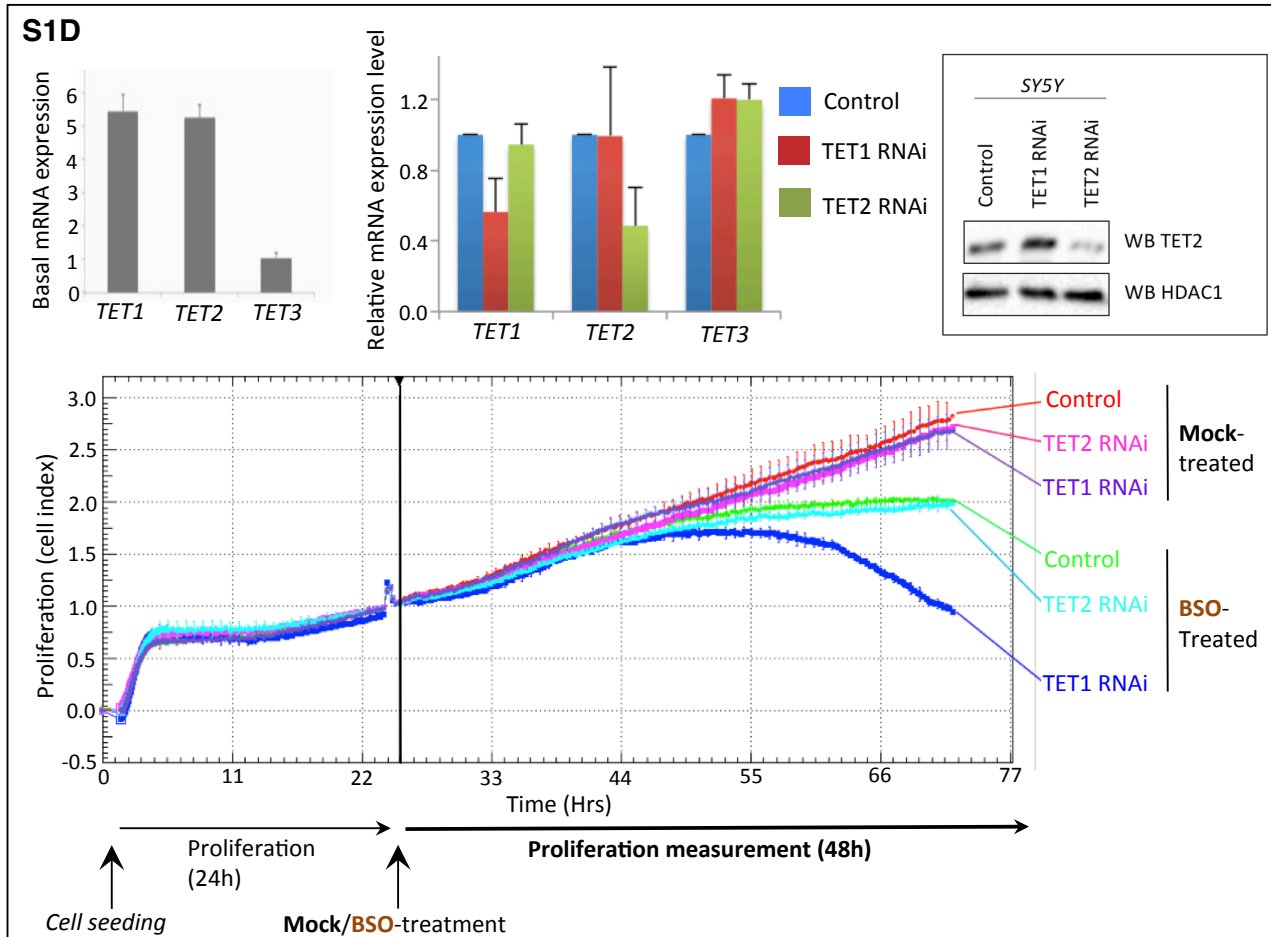

Supplementary Figure 1. Delatte *et al.*

### S2A

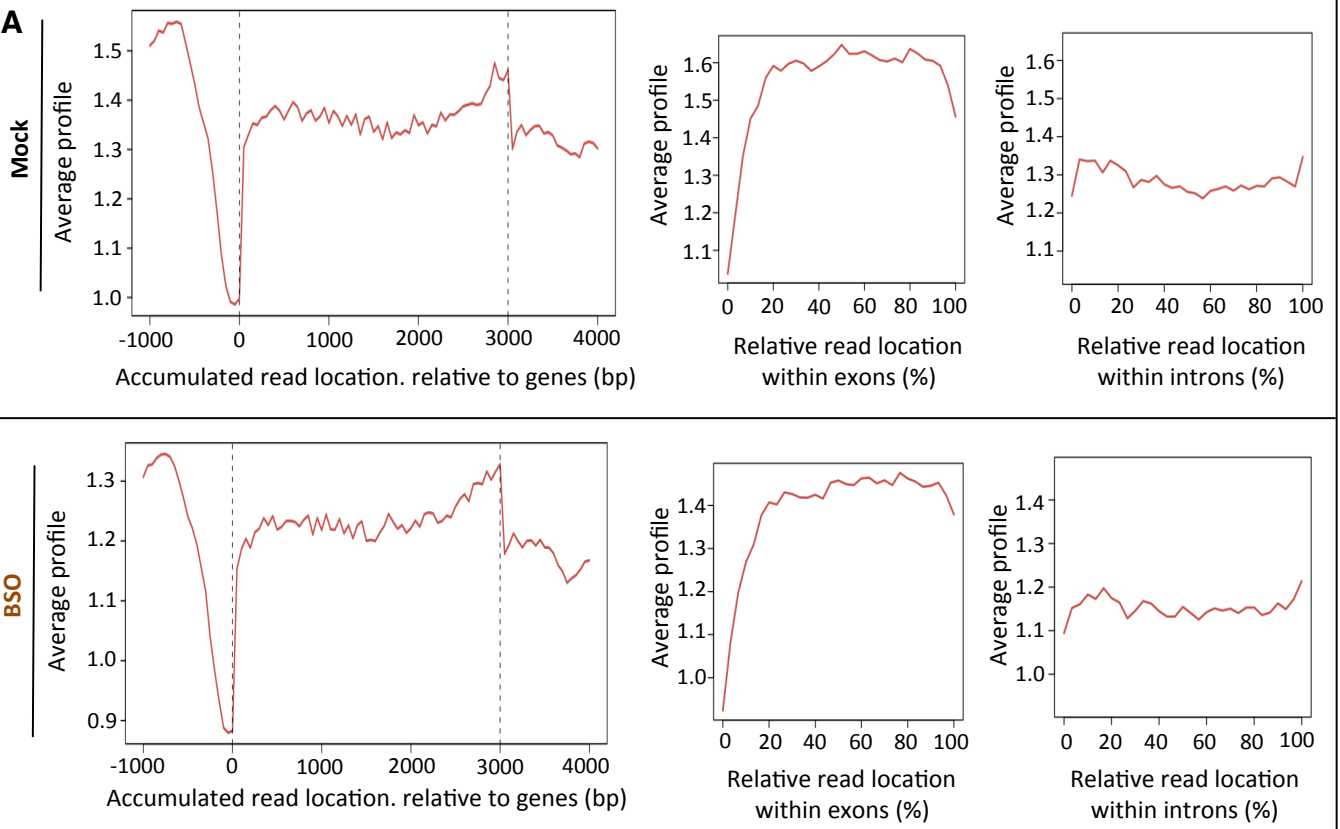

### S2B

#### Toxicogenomic pathways (Ingenuity)

+ Pathways related to hmC gain  
 - Pathways related to hmC loss  
 Pathways related to oxidative stress  
 Significance threshold

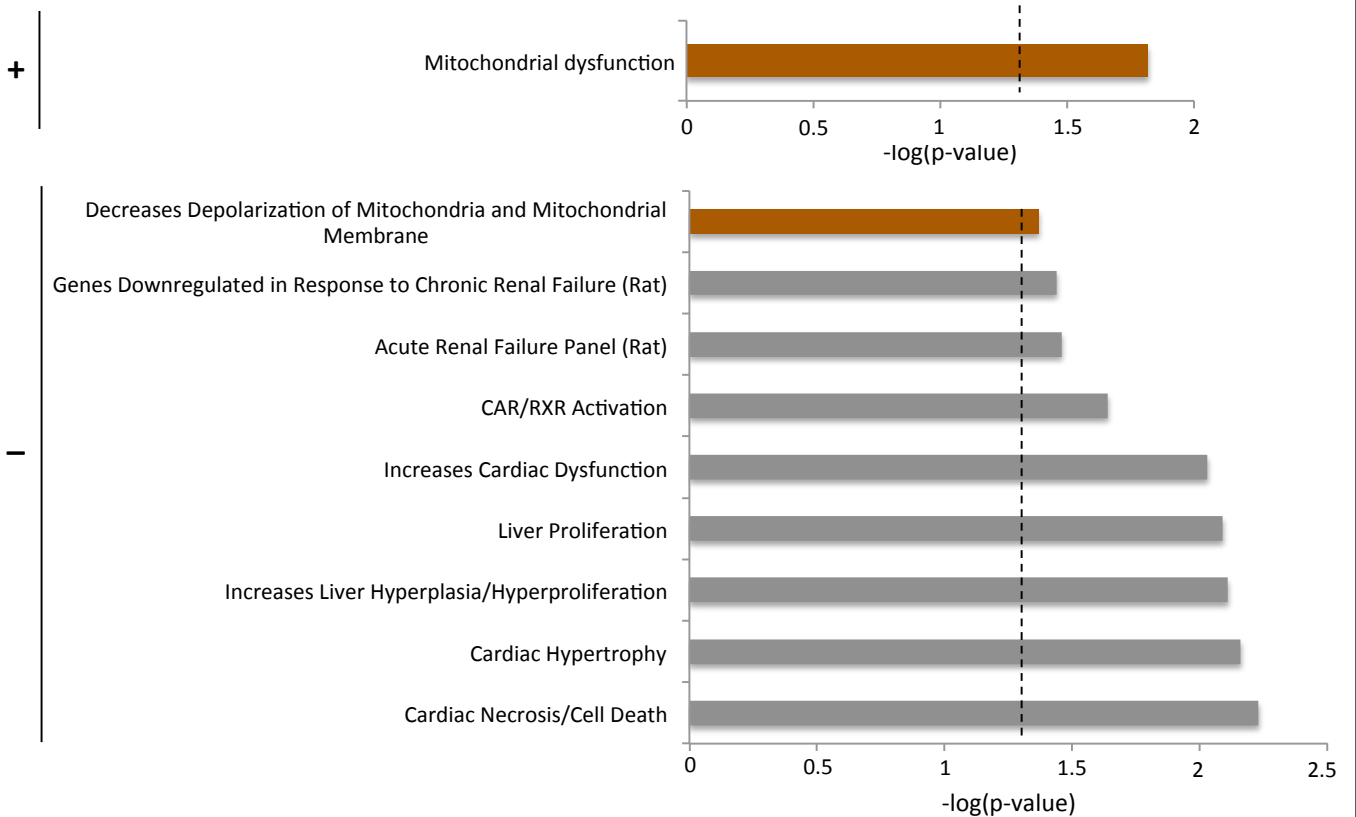

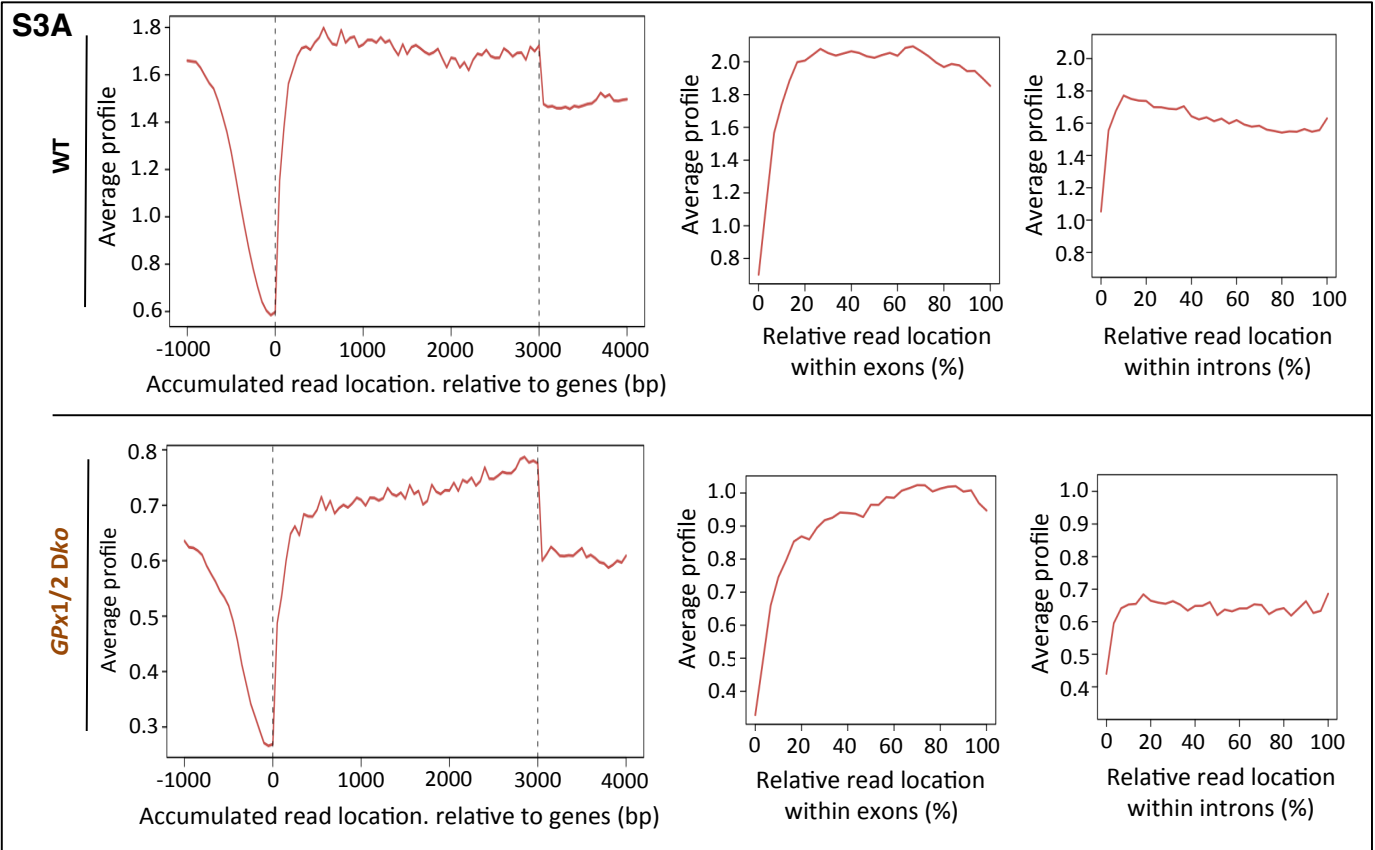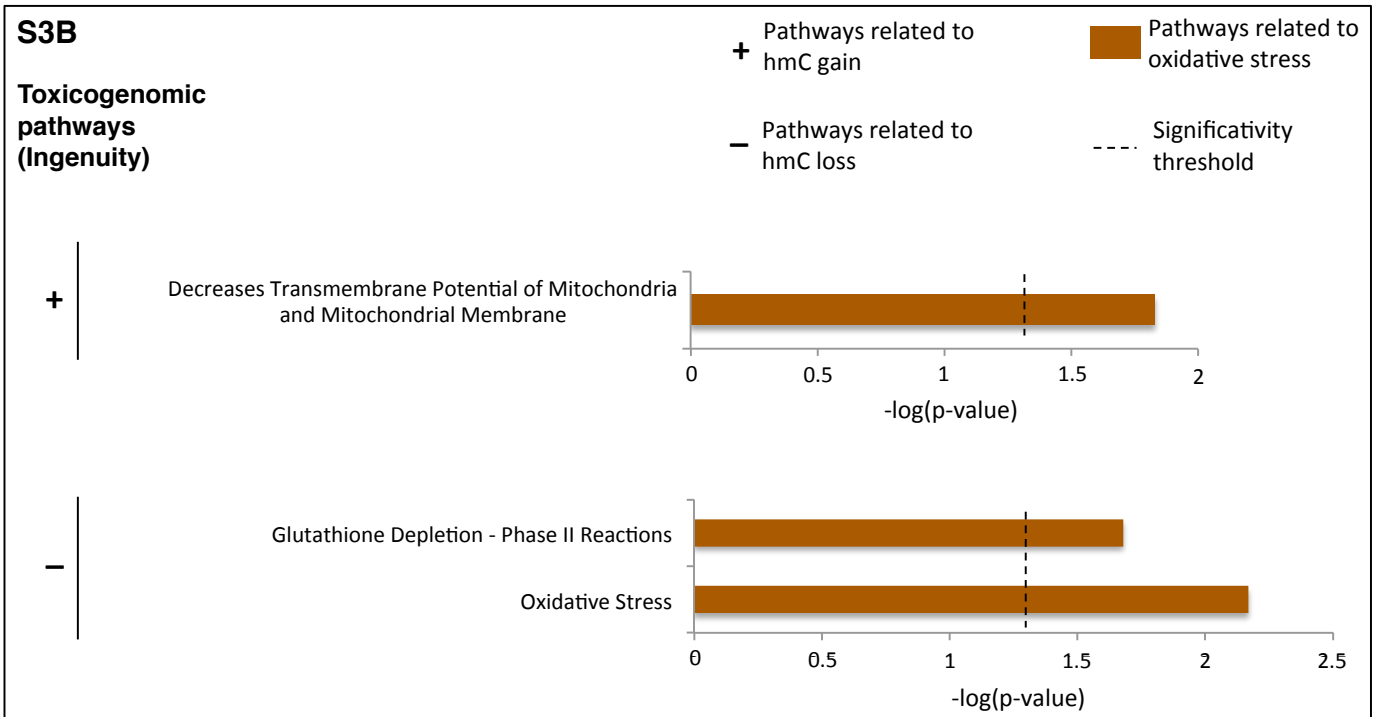

**S4**

| Common miRs contained in dhMGs (SY5Y and mice samples) | Increase (+) or decrease (-) hmC in BSO vs mock -treated SY5Y | Increase (+) or decrease (-) hmC in <i>GPx1/2 Dko</i> vs wt mice |
|--------------------------------------------------------|---------------------------------------------------------------|------------------------------------------------------------------|
| <b>miR-1247</b>                                        | -                                                             | -                                                                |
| <b>miR-137</b>                                         | +                                                             | +                                                                |
| <b>miR-148a</b>                                        | +                                                             | +                                                                |
| <b>miR-148b</b>                                        | +                                                             | +                                                                |
| <b>miR-15a</b>                                         | -                                                             | -                                                                |
| <b>miR-191</b>                                         | -                                                             | -                                                                |
| <b>miR-193b</b>                                        | -                                                             | -                                                                |
| <b>miR-202</b>                                         | +                                                             | +                                                                |
| <b>miR-22</b>                                          | +                                                             | +                                                                |
| <b>miR-30a</b>                                         | -                                                             | -                                                                |
| <b>miR-31</b>                                          | -                                                             | -                                                                |
| <b>miR-449a</b>                                        | +                                                             | +                                                                |
| <b>miR-488</b>                                         | -                                                             | -                                                                |
| <b>miR-497</b>                                         | +                                                             | +                                                                |
| <b>miR-532</b>                                         | -                                                             | -                                                                |
| <b>miR-675</b>                                         | +                                                             | +                                                                |
| <b>miR-7-2</b>                                         | -                                                             | -                                                                |
| <b>miR-877</b>                                         | +                                                             | +                                                                |
| <b>miR-let-7d</b>                                      | -                                                             | -                                                                |
| <b>miR-let-7g</b>                                      | -                                                             | -                                                                |

## Supplementary methods

### RNA interference and RT-qPCR analysis

Interfering RNAs for TET1 and TET2 were generated as previously described<sup>1</sup>. Briefly, the target sequence used to silence TETs (primers available upon request) were inserted as a short hairpin into the pRetroSuper (pRS) retroviral vector according to the manufacturer's recommendations (OligoEngine), to form TET1 or TET2 RNAi. Retrovirus production by HEK293GP cells and infection of SY5Y were performed as described in<sup>1</sup>. Infected cells were selected with 1.5 µg/ml puromycin (Sigma). RNA purification and RT-qPCR analysis were performed as described previously<sup>1</sup>. For supplementary Fig S1D (upper right panel), RT-qPCR analysis was performed on mRNAs from TET1- and TET2-knockdown cells (TET1, TET2 RNAi) and results are expressed relatively to the control (pRS-empty). In supplementary Fig S1D (upper left panel), the results are normalized to the level of *HPRT* housekeeping gene. Primers are available upon request.

### Dot blot for 5-hydroxymethylcytosine quantification

Isolated genomic DNA was incubated at 95°C for 10 min and immediately chilled on ice to obtain single-stranded DNA. Then, 1.5 µl (approx. 500nG) DNA was spotted in triplicate onto a nylon membrane (GE Healthcare Hybond-N+). After drying the membrane, cross-linking was performed twice with 200 000 µJ/cm<sup>2</sup> of UV. The membrane was blocked overnight at 4°C in 10% (w/v) non-fat dry milk + 1% (w/v) BSA in PBS+0.1% Tween 20. The membrane was then transferred into blocking solution supplemented with rabbit anti-hmC polyclonal antibodies (from Active Motif) diluted 1:1000. This antibody was validated for specificity in<sup>2,3</sup> and further validated as shown in supplementary Fig S1C. The quantity of input DNA was assessed by incubation for 1 h on a stripped membrane with human anti-ssDNA antibody (diluted 1:100)

(LSBio). After incubation with the primary antibody, the membrane was washed 3 times for 10 min with PBS+0.1% Tween 20 and transferred into blocking solution supplemented with HRP-conjugated anti-rabbit isotype (GE Healthcare) (diluted 1:5000) or anti-human isotype (Jackson Immuno Research) (diluted 1:10,000), and incubated for 1 h at room temperature. This was followed by 3 washing steps with PBS+0.1% Tween 20. Peroxidase activity was detected by ECL (Western Lightning Plus-ECL, Perkin-Elmer) and signal detection was done with the Bio-Rad ChemiDoc system (Bio-Rad). For spot signal quantification, imageJ64 software was used. Membrane stripping was performed in PBS supplemented with 20% SDS and 1.5%  $\beta$ -mercaptoethanol for 30 minutes at 50°C, then the membrane was washed extensively with PBS+0.1% Tween 20.

### **Reactive Oxygen Species (ROS) measurements**

Cellular ROS production was determined by CM-H2DCFDA staining (Life technologies) by following the manufacturer's protocol. This chloromethyl derivative of H2DCFDA passively diffuses into cells, where its acetate groups are cleaved by intracellular esterases and its thiol-reactive chloromethyl group reacts with intracellular glutathione and other thiols. Subsequent oxidation produces a fluorescent adduct that is trapped inside the cells, and that can be measured by fluorescence, in our case, by FACS measurement. In brief, SY5Y cells were incubated in PBS containing 5 $\mu$ M of the CM-H2DCFDA dye for 20 min at 37°C, then cells were further incubated in complete medium for 20 min at 37°C and were trypsinized. Measurements (on the FITC channel) were done on a FACSCanto II flow cytometer (BD Biosciences).

### **Measures of apoptosis and necrosis**

Percentages of viable, apoptotic, and necrotic cells were determined on mock-treated SY5Y cells and on SY5Y cells treated for 48 h with 500  $\mu$ M of BSO or 5  $\mu$ M rotenone (as a positive control

for apoptosis and necrosis) after a 15-min incubation with the DNA-binding dyes propidium iodide (PI, 5 µg/ml; Sigma) and Hoechst 33342 (HO, 5 µg/ml; Sigma), as previously described <sup>4,5</sup>. A minimum of 600 cells was counted for each experimental condition. Apoptosis and necrosis were evaluated by two independent observers, one of them unaware of sample identity. Agreement between the findings of the two observers was >90%. Results are expressed as percentages calculated by dividing the number of apoptotic or necrotic cells by the total number of cells and multiplying by 100.

### **Proliferation experiments (with the xCELLigence device)**

To evaluate SY5Y cell proliferation upon TET depletion (see above) and upon treatment with BSO, cells were seeded into the xCELLigence E-plate 16 (Roche) at 5000 cells/well according to the manufacturer's instructions, and as described in Denis *et al.* (manuscript in preparation). In this system, the electrical impedance is used to derive a cell index which, when continually monitored, gives a real-time representation of cell growth. Measurements were automatically collected with the RTCA DP analyzer every 40 min for up to 48 h. Three technical replicates were produced per condition and the experiment was done at least three independent times. The data were then analyzed with the provided RTCA software.

### **Library preparation, deep sequencing workflow, and data analysis**

Library preparation was done with the TruSeq ChIP Sample Prep Kit (Illumina) according to the manufacturer's instructions. Briefly, captured hydroxymethylated DNA fragments were subjected to 5' and 3' protruding end repair, and non-templated adenines were added to the 3' ends of the blunted DNA fragments. Illumina adapters were ligated and DNA was size selected with a 2% agarose gel cassette (E-gel, Life technologies) in order to remove all unligated adapters and to select for 300-bp fragments. Next, 18 cycles of PCR were done to amplify the library. DNA was



then quantified by fluorometry with the Qubit 2.0 fluorometer (Life technologies) and its integrity was assessed with the Agilent 2100 BioAnalyzer (Agilent). 6 pM of DNA library, spiked with 1% PhiX viral DNA, was clustered on cBot (Illumina), and then sequencing was performed on a HiScanSQ module (Illumina). The BWA software <sup>6</sup> was used to map sequencing reads that were mapped to the human genome (NCBI Build 36 / UCSC hg18) (SY5Y cells) or to the mouse genome (NCBI Build 37 / UCSC mm9) (mouse samples). Reads not uniquely mapping to the reference genome were discarded. Raw data are available under the Gene Expression Omnibus [<http://www.ncbi.nlm.nih.gov/geo/query/acc.cgi?token=cfgzooqetvulvgl&acc=GSE59718>] database [GSE59718] ID. Read density was computed by removing duplicate reads (*i.e.* mapping to the same location) and by normalizing the local read count with respect to the total read count. Local enrichment in hmC was evaluated with the MACS software <sup>7</sup>, with a p-value cut-off < 10e-10. Differences between hmC levels were assessed for all annotated RefSeq transcripts (Gene Body) by first counting the normalized number of reads (FPKM) and then computing the fold change (FPKM condition 1 / FPKM condition 2) and the absolute delta value (FPKM condition 1 - FPKM condition 2) between the two conditions. Genes were sorted according their absolute fold change after discarding genes with a low absolute difference (absolute delta) to avoid artifactual effects. hmC profiles around the TSS and within exons and introns were computed by first computing the local enrichment with the MACS software and then annotating the enrichment with the CEAS software <sup>8</sup>. All statistics and plotting were done with the R statistical software. To obtain sequencing tracks (Fig 2D and 3D), wig files were uploaded onto the UCSC genome browser.

## Supplementary references

- 1 Vire, E. *et al.* The Polycomb group protein EZH2 directly controls DNA methylation. *Nature* **439**, 871-874, doi:10.1038/nature04431 (2006).
- 2 Ito, S. *et al.* Role of Tet proteins in 5mC to 5hmC conversion, ES-cell self-renewal and inner cell mass specification. *Nature* **466**, 1129-1133, doi:10.1038/nature09303 (2010).
- 3 Deplus, R. *et al.* TET2 and TET3 regulate GlcNAcylation and H3K4 methylation through OGT and SET1/COMPASS. *EMBO J* **32**, 645-655, doi:10.1038/emboj.2012.357 (2013).
- 4 Kutlu, B. *et al.* Discovery of gene networks regulating cytokine-induced dysfunction and apoptosis in insulin-producing INS-1 cells. *Diabetes* **52**, 2701-2719 (2003).
- 5 Rasschaert, J. *et al.* Toll-like receptor 3 and STAT-1 contribute to double-stranded RNA+ interferon-gamma-induced apoptosis in primary pancreatic beta-cells. *J Biol Chem* **280**, 33984-33991, doi:10.1074/jbc.M502213200 (2005).
- 6 Li, H. & Durbin, R. Fast and accurate short read alignment with Burrows-Wheeler transform. *Bioinformatics* **25**, 1754-1760, doi:10.1093/bioinformatics/btp324 (2009).
- 7 Zhang, Y. *et al.* Model-based analysis of ChIP-Seq (MACS). *Genome Biol* **9**, R137, doi:10.1186/gb-2008-9-9-r137 (2008).
- 8 Shin, H., Liu, T., Manrai, A. K. & Liu, X. S. CEAS: cis-regulatory element annotation system. *Bioinformatics* **25**, 2605-2606, doi:10.1093/bioinformatics/btp479 (2009).

**Supplementary Figure S1 (related to Figure 1). Apoptosis, necrosis, and ROS measurements; dot blot controls and cell proliferation.**

**(A)** Percentages of apoptotic (upper panel) and necrotic (lower panel) cells measured by fluorescence microscopy on SY5Y cells subjected to mock treatment, or treated with 500  $\mu$ M of BSO and 5  $\mu$ M of rotenone (as a positive control for apoptosis/necrosis) for 48 h. Data are means  $\pm$  standard deviations of at least 3 independent experiments. NS = non-significant. **(B)** Reactive oxygen species (ROS) were quantitated by FACS analysis with a CM-H2DCFDA probe after treatment of SY5Y cells with 500  $\mu$ M of BSO. Peak shifts towards higher fluorescence intensities in BSO-treated (red peak) versus mock-treated (black peaks) cells, and are indicative of increased intracellular levels of ROS in the former cell population. Median intensities for this representative experiment are also shown. **(C)** Specificity of the anti-hmC antibody used in our experiments: controls with *in vitro* PCR fragments containing only non-modified cytosines (C control), methylated cytosines (mC control), or hydroxymethylated cytosines (hmC control). Dashed circles denote the total absence of signal. **(D)** Proliferation of SY5Y cells after knockdown of *TET1* or *TET2* expression. Upper left panel: Basal levels of *TET1*, *TET2*, and *TET3* transcripts (relative to *HPRT*). Upper right panel: Levels of the three TET transcripts after treatment with *TET1*- or *TET2*-targeting interfering RNA (RNAi). Results are normalized with respect to the levels observed in control cells transfected with an empty vector. On the upper right panel: validation of the *TET2*-targeting RNAi at protein level by western blotting. HDAC1 levels confirm that equal amounts of extract were used. The lower panel shows proliferation curves obtained with the xCelligence device for control-, *TET1*- and *TET2*-knockdown cells, mock-treated or BSO-treated. Briefly, SY5Y cells were seeded and grown for 24 h and then the proliferation of mock- and 500- $\mu$ M-BSO-treated cells was monitored continuously for 48 h.

**Supplementary Figure S2 (related to Figure 2). Deep-sequencing profiles and Ingenuity toxicogenomic analyses of dhMGs showing an increase or a decrease of hmC in BSO-treated cells.**

(A) Upper panels: Normalized average sequencing read counts obtained for mock-treated S5Y5 cells are plotted against the distance upstream or downstream from transcription start site (TSS). Average read accumulation within exons and introns is also shown. Lower panels: same as above, but for BSO-treated cells. (B) Toxicogenomic analyses (IPA-Tox) applied to dhMGs showing an hmC gain in SY5Y cells reveals over-representation of oxidative-stress-related pathways (marked in brown). IPA-Tox applied to dhMGs showing an hmC decrease reveals over-representation of other pathways, such as ones involved in heart or liver physiopathology. In each graph the log(p-value) is plotted on the x-axis and a dashed line indicates the significance threshold for pathway over-representation.

**Supplementary Figure S3 (related to Figure 3). Deep-sequencing profiles and Ingenuity toxicogenomic analysis of dhMGs showing an increase or a decrease of hmC in *GPx1/2 Dko* mice.**

(A) Upper panels: Average normalized sequencing reads corresponding to dhMGs are plotted as a function of distance upstream or downstream from the transcription start site (TSS) in epithelial cells from wt mice. Average read accumulation within exons and introns is also shown. Lower panels: Same as above, but for *GPx1/2 Dko* mice. Representative experiment. (B) IPA-Tox applied to dhMGs identified in cells from the large intestine of mice: oxidative-stress-related pathways (marked in brown) appear over-represented whether the dhMGs display a gain or a loss of hmC in *GPx1/2 Dko* vs. wt mice (data from the two sequencing experiments). In each graph the x axis shows the log(p-value) and a dashed line indicates the significance threshold for

pathway over-representation.

**Supplementary Figure S4 (related to Figure 4). Differentially hydroxymethylated microRNA regions common in SY5Y cells and in mice samples.**

A list of the 20 human (SY5Y) and mouse miRs is shown here. They were selected by comparing dhMGs in BSO- vs. mock-treated SY5Y and in *GPx1/2 Dko* vs. wt mice. A “+” means that there is an increase in hmC in BSO- vs. mock-treated SY5Y cells (column 2) and in *GPx1/2 Dko* vs. wt mouse samples (column 3). Accordingly, a “-” means that there is a decrease in hmC in BSO- vs. mock-treated SY5Y cells (column 2) and in *GPx1/2 Dko* vs. wt mouse samples.

## **SUPPLEMENTARY TABLES**

### **Table I (related to Fig. 2a). Gene symbol and hmC Fold enrichment (BSO vs Mock).**

Differentially hydroxymethylated regions (dhMRs) on gene-coding sequences, identified upon comparison of hmC profiles of BSO and mock -treated SY5Y cells.

### **Table II (related to Fig. 3a). Gene symbol, mice normalized intensity of reads, mean of the duplicate, and hmC Fold enrichment (Dko vs wt).**

Differentially hydroxymethylated regions (dhMRs) on gene-coding sequences, identified upon comparison of hmC profiles of *GPx1/2* double-knockout (*Dko*) and wild-type (wt) mice.

### **Table III (related to Fig. 4a). MiRs found in mice or in SY5Y cells.**

Differentially hydroxymethylated MicroRNA genes identified upon comparison of hmC profiles of BSO and mock -treated SY5Y cells (“miRs-SY5Y”), and upon comparison of hmC profiles of *GPx1/2* double-knockout and wild-type mice (“miRs-mice”).

### **Table IV (related to Fig. 4b). MiRWalk Predicted mRNAs found in mice or in SY5Y cells, as well as common mRNAs found in mice and in SY5Y cells.**

MiRWalk Predicted SY5Y and mice transcripts of the 20 differentially hydroxymethylated miRs identified upon comparison of hmC profiles of BSO and mock -treated SY5Y cells, and upon comparison of hmC profiles of *GPx1/2* double-knockout and wild-type mice.

**Table 1** Gene symbol and hmC Fold enrichment (BSO vs Mock), related to Fig. 2a

| <b>Gene symbol</b>  | <b>hmC Fold enrichment<br/>(BSO vs Mock)</b> |
|---------------------|----------------------------------------------|
| <i>USP9Y</i>        | inf                                          |
| <i>NLGN4Y</i>       | inf                                          |
| <i>NBPF24</i>       | inf                                          |
| <i>NBPF11</i>       | inf                                          |
| <i>THAP4</i>        | inf                                          |
| <i>GPR89C</i>       | inf                                          |
| <i>BTNL8</i>        | inf                                          |
| <i>TXLNG2P</i>      | inf                                          |
| <i>HGD</i>          | inf                                          |
| <i>NBPF24</i>       | inf                                          |
| <i>LOC100130000</i> | inf                                          |
| <i>BCORP1</i>       | inf                                          |
| <i>BMS1P5</i>       | inf                                          |
| <i>TXLNG2P</i>      | inf                                          |
| <i>LOC653501</i>    | inf                                          |
| <i>CRLF2</i>        | inf                                          |
| <i>CRLF2</i>        | inf                                          |
| <i>NPIPA3</i>       | inf                                          |
| <i>NPIPA2</i>       | inf                                          |
| <i>RIMBP3B</i>      | inf                                          |
| <i>SPACA5</i>       | inf                                          |
| <i>DGAT1</i>        | inf                                          |
| <i>GOLGA6L1</i>     | inf                                          |
| <i>UGT2B15</i>      | inf                                          |
| <i>PLGLB2</i>       | inf                                          |
| <i>PLGLB1</i>       | inf                                          |
| <i>TRIM53AP</i>     | inf                                          |
| <i>ANAPC11</i>      | inf                                          |
| <i>ANKRD20A3</i>    | inf                                          |
| <i>ANKRD20A2</i>    | inf                                          |
| <i>ARHGEF35</i>     | inf                                          |
| <i>PRAMEF5</i>      | inf                                          |
| <i>PRAMEF6</i>      | inf                                          |
| <i>LOC100133267</i> | inf                                          |
| <i>SPATA31A2</i>    | inf                                          |
| <i>SPATA31A1</i>    | inf                                          |
| <i>TMEM167B</i>     | inf                                          |
| <i>EIF3CL</i>       | inf                                          |
| <i>EIF3C</i>        | inf                                          |
| <i>TCP11X2</i>      | inf                                          |
| <i>SCRT1</i>        | inf                                          |
| <i>DUX4L</i>        | inf                                          |

|                     |     |
|---------------------|-----|
| <i>OPN1MW</i>       | inf |
| <i>DEFB107A</i>     | inf |
| <i>TAF9B</i>        | inf |
| <i>OPN1MW2</i>      | inf |
| <i>LOC151009</i>    | inf |
| <i>PRAMEF6</i>      | inf |
| <i>LOC440894</i>    | inf |
| <i>TMSB4Y</i>       | inf |
| <i>DEFB106B</i>     | inf |
| <i>PRAMEF23</i>     | inf |
| <i>LOC100133267</i> | inf |
| <i>GAGE2E</i>       | inf |
| <i>FAM225A</i>      | inf |
| <i>RIMBP3C</i>      | inf |
| <i>KIF22</i>        | inf |
| <i>PRAMEF13</i>     | inf |
| <i>CTAGE4</i>       | inf |
| <i>OR6T1</i>        | inf |
| <i>OR2W1</i>        | inf |
| <i>OR7A17</i>       | inf |
| <i>FFAR3</i>        | inf |
| <i>SPATA31D4</i>    | inf |
| <i>FAM27A</i>       | inf |
| <i>PRAMEF16</i>     | inf |
| <i>AMY1A</i>        | inf |
| <i>LOC100287728</i> | inf |
| <i>AMY1A</i>        | inf |
| <i>AMY1C</i>        | inf |
| <i>AMY1B</i>        | inf |
| <i>PRAMEF10</i>     | inf |
| <i>PRAMEF22</i>     | inf |
| <i>MTRNR2L8</i>     | inf |
| <i>KRTAP13-3</i>    | inf |
| <i>KRTAP29-1</i>    | inf |
| <i>DDX11L1</i>      | inf |
| <i>OR2L3</i>        | inf |
| <i>OR2T27</i>       | inf |
| <i>FBXO22-AS1</i>   | inf |
| <i>RNASE8</i>       | inf |
| <i>MIR3163</i>      | inf |
| <i>LOC100289656</i> | inf |
| <i>FAM25B</i>       | inf |
| <i>POU5F1P3</i>     | inf |
| <i>C9orf169</i>     | inf |
| <i>REXO1L2P</i>     | inf |
| <i>LOC100272216</i> | inf |



|                    |     |
|--------------------|-----|
| <i>FAM226B</i>     | inf |
| <i>OR52E8</i>      | inf |
| <i>KRTAP10-10</i>  | inf |
| <i>FOXD4L3</i>     | inf |
| <i>H1FX</i>        | inf |
| <i>OR13H1</i>      | inf |
| <i>FAM27B</i>      | inf |
| <i>SNORA11</i>     | inf |
| <i>SNORA7B</i>     | inf |
| <i>SCARNA3</i>     | inf |
| <i>PABPC1L2B</i>   | inf |
| <i>LCE3A</i>       | inf |
| <i>PRR21</i>       | inf |
| <i>CXorf27</i>     | inf |
| <i>DPM3</i>        | inf |
| <i>IFNA7</i>       | inf |
| <i>MRPL53</i>      | inf |
| <i>OR7E37P</i>     | inf |
| <i>PRR20E</i>      | inf |
| <i>OR13C2</i>      | inf |
| <i>OR8H3</i>       | inf |
| <i>MIR660</i>      | inf |
| <i>MIR502</i>      | inf |
| <i>MIR3613</i>     | inf |
| <i>MIR497</i>      | inf |
| <i>SNORD115-10</i> | inf |
| <i>SNORD115-14</i> | inf |
| <i>SNORD115-19</i> | inf |
| <i>MIR4503</i>     | inf |
| <i>MIR638</i>      | inf |
| <i>MIR520E</i>     | inf |
| <i>MIR941-3</i>    | inf |
| <i>MIR941-2</i>    | inf |
| <i>MIR5004</i>     | inf |
| <i>MIR580</i>      | inf |
| <i>MIR3960</i>     | inf |
| <i>OR4M2</i>       | inf |
| <i>LOC649352</i>   | inf |
| <i>SF3B5</i>       | inf |
| <i>SPANXC</i>      | inf |
| <i>OR52N4</i>      | inf |
| <i>OR4C13</i>      | inf |
| <i>DPM3</i>        | inf |
| <i>OR2T33</i>      | inf |
| <i>OR2T35</i>      | inf |
| <i>HIST1H4G</i>    | inf |

|                   |     |
|-------------------|-----|
| <i>OR8B2</i>      | inf |
| <i>HIST1H3A</i>   | inf |
| <i>CLDN17</i>     | inf |
| <i>DUX4L4</i>     | inf |
| <i>OR4F17</i>     | inf |
| <i>SNHG9</i>      | inf |
| <i>OR1E2</i>      | inf |
| <i>MIR3652</i>    | inf |
| <i>BACE1-AS</i>   | inf |
| <i>WWOX</i>       | inf |
| <i>SNORA4</i>     | inf |
| <i>HIST1H3H</i>   | inf |
| <i>MIR4767</i>    | inf |
| <i>MIR4329</i>    | inf |
| <i>MIR888</i>     | inf |
| <i>MIR4302</i>    | inf |
| <i>MIR4488</i>    | inf |
| <i>MIR4294</i>    | inf |
| <i>MIR4482-1</i>  | inf |
| <i>MIR484</i>     | inf |
| <i>MIR328</i>     | inf |
| <i>SNORD114-8</i> | inf |
| <i>MIR296</i>     | inf |
| <i>MIR3197</i>    | inf |
| <i>SNORA22</i>    | inf |
| <i>HIST1H4H</i>   | inf |
| <i>MIR3692</i>    | inf |
| <i>MIR711</i>     | inf |
| <i>MIR4446</i>    | inf |
| <i>MIR5703</i>    | inf |
| <i>SNORD74</i>    | inf |
| <i>MIR4260</i>    | inf |
| <i>MIR4667</i>    | inf |
| <i>MIR4668</i>    | inf |
| <i>HNRNPCP5</i>   | inf |
| <i>HCG14</i>      | inf |
| <i>WFDC12</i>     | inf |
| <i>OR2A4</i>      | inf |
| <i>OR10H3</i>     | inf |
| <i>OR11H1</i>     | inf |
| <i>KRTAP13-4</i>  | inf |
| <i>USP17L9P</i>   | inf |
| <i>USP17L22</i>   | inf |
| <i>OR5M10</i>     | inf |
| <i>OR56A4</i>     | inf |
| <i>FAM163B</i>    | inf |

|                    |     |
|--------------------|-----|
| <i>MIR221</i>      | inf |
| <i>MIR106A</i>     | inf |
| <i>MIR4725</i>     | inf |
| <i>SNORD116-4</i>  | inf |
| <i>SNORD116-16</i> | inf |
| <i>MIR329-2</i>    | inf |
| <i>MIR320C1</i>    | inf |
| <i>MIR5090</i>     | inf |
| <i>MIR1236</i>     | inf |
| <i>MIR324</i>      | inf |
| <i>SNORD115-23</i> | inf |
| <i>MIR4307</i>     | inf |
| <i>MIR527</i>      | inf |
| <i>MIR4741</i>     | inf |
| <i>MIR548F4</i>    | inf |
| <i>MIR449A</i>     | inf |
| <i>MIR3655</i>     | inf |
| <i>MIR3921</i>     | inf |
| <i>MIR942</i>      | inf |
| <i>SNORA20</i>     | inf |
| <i>SCARNA23</i>    | inf |
| <i>MIR498</i>      | inf |
| <i>TAS2R40</i>     | inf |
| <i>HIST1H2AM</i>   | inf |
| <i>CGB7</i>        | inf |
| <i>OR10A2</i>      | inf |
| <i>HIST1H3F</i>    | inf |
| <i>TAS2R8</i>      | inf |
| <i>OR11G2</i>      | inf |
| <i>KRTAP8-1</i>    | inf |
| <i>OR1D4</i>       | inf |
| <i>FTH1P18</i>     | inf |
| <i>OR1M1</i>       | inf |
| <i>OR5M1</i>       | inf |
| <i>OR6K6</i>       | inf |
| <i>RPL23AP32</i>   | inf |
| <i>OR10H5</i>      | inf |
| <i>MIR5582</i>     | inf |
| <i>OR5F1</i>       | inf |
| <i>MIR4483</i>     | inf |
| <i>SNORD49B</i>    | inf |
| <i>MIR1910</i>     | inf |
| <i>SNORD109A</i>   | inf |
| <i>SNORD113-6</i>  | inf |
| <i>MIR3201</i>     | inf |
| <i>SNORD12C</i>    | inf |

|                    |     |
|--------------------|-----|
| <i>MIR4645</i>     | inf |
| <i>MIR4270</i>     | inf |
| <i>MIR4782</i>     | inf |
| <i>SNORD38B</i>    | inf |
| <i>MIR4711</i>     | inf |
| <i>KRTAP19-8</i>   | inf |
| <i>MIR450A2</i>    | inf |
| <i>MIR1912</i>     | inf |
| <i>RNU6-78P</i>    | inf |
| <i>MIR670</i>      | inf |
| <i>MIR548AR</i>    | inf |
| <i>RNU6-59P</i>    | inf |
| <i>MIR4726</i>     | inf |
| <i>MIR4315-1</i>   | inf |
| <i>MIR3178</i>     | inf |
| <i>SNORD115-5</i>  | inf |
| <i>SNORD115-10</i> | inf |
| <i>SNORD115-13</i> | inf |
| <i>SNORD115-25</i> | inf |
| <i>SNORD115-47</i> | inf |
| <i>MIR4312</i>     | inf |
| <i>MIR3173</i>     | inf |
| <i>SNORD113-7</i>  | inf |
| <i>SNORD114-1</i>  | inf |
| <i>MIR889</i>      | inf |
| <i>MIR655</i>      | inf |
| <i>MIR369</i>      | inf |
| <i>MIR4710</i>     | inf |
| <i>MIR4999</i>     | inf |
| <i>MIR515-2</i>    | inf |
| <i>MIR517C</i>     | inf |
| <i>MIR1257</i>     | inf |
| <i>MIR941-4</i>    | inf |
| <i>MIR941-2</i>    | inf |
| <i>MIR4652</i>     | inf |
| <i>MIR592</i>      | inf |
| <i>SNORD52</i>     | inf |
| <i>MIR548AD</i>    | inf |
| <i>SNORA47</i>     | inf |
| <i>RNU6-69P</i>    | inf |
| <i>MIR1301</i>     | inf |
| <i>MIR216B</i>     | inf |
| <i>MIR4444-1</i>   | inf |
| <i>MIR1258</i>     | inf |
| <i>MIR3129</i>     | inf |
| <i>MIR4689</i>     | inf |

|                    |     |
|--------------------|-----|
| <i>MIR4695</i>     | inf |
| <i>MIR137</i>      | inf |
| <i>MIR2861</i>     | inf |
| <i>SNORD36C</i>    | inf |
| <i>MIR1322</i>     | inf |
| <i>MIR3610</i>     | inf |
| <i>OR51A4</i>      | inf |
| <i>PPIAL4G</i>     | inf |
| <i>MRPL41</i>      | inf |
| <i>RPL23AP64</i>   | inf |
| <i>DEFA9P</i>      | inf |
| <i>OR1A1</i>       | inf |
| <i>HIST1H3I</i>    | inf |
| <i>MIR504</i>      | inf |
| <i>MIR507</i>      | inf |
| <i>MIR548X2</i>    | inf |
| <i>MIR1287</i>     | inf |
| <i>MIR378C</i>     | inf |
| <i>MIR144</i>      | inf |
| <i>MIR4737</i>     | inf |
| <i>SNORD1B</i>     | inf |
| <i>SNORD60</i>     | inf |
| <i>MIR940</i>      | inf |
| <i>SNORD116-9</i>  | inf |
| <i>SNORD115-35</i> | inf |
| <i>SNORD115-10</i> | inf |
| <i>MIR4748</i>     | inf |
| <i>MIR519C</i>     | inf |
| <i>MIR519B</i>     | inf |
| <i>MIR520C</i>     | inf |
| <i>MIR521-2</i>    | inf |
| <i>MIR593</i>      | inf |
| <i>MIR9-2</i>      | inf |
| <i>MIR1289-2</i>   | inf |
| <i>MIR4267</i>     | inf |
| <i>OR6C75</i>      | inf |
| <i>MIR3169</i>     | inf |
| <i>SNORD86</i>     | inf |
| <i>MIR5707</i>     | inf |
| <i>MIR194-1</i>    | inf |
| <i>SPRR2A</i>      | inf |
| <i>OR8D4</i>       | inf |
| <i>C6orf226</i>    | inf |
| <i>PI3</i>         | inf |
| <i>KRTAP9-6</i>    | inf |
| <i>HIST1H2BD</i>   | inf |

|                     |     |
|---------------------|-----|
| <i>LOC100240734</i> | inf |
| <i>KRTAP12-4</i>    | inf |
| <i>MIR510</i>       | inf |
| <i>MIR675</i>       | inf |
| <i>SNORD114-6</i>   | inf |
| <i>MIR376C</i>      | inf |
| <i>MIR3192</i>      | inf |
| <i>SNORD45C</i>     | inf |
| <i>SNORD45B</i>     | inf |
| <i>MIR4423</i>      | inf |
| <i>SNAR-I</i>       | inf |
| <i>NAT8B</i>        | inf |
| <i>SNORA23</i>      | inf |
| <i>LOC100996349</i> | inf |
| <i>MIR636</i>       | inf |
| <i>MIR412</i>       | inf |
| <i>SNORD19B</i>     | inf |
| <i>MIR3663</i>      | inf |
| <i>MIR489</i>       | inf |
| <i>MIR1324</i>      | inf |
| <i>SNORA5B</i>      | inf |
| <i>HIST1H2BI</i>    | inf |
| <i>MIR4500</i>      | inf |
| <i>MIR3913-1</i>    | inf |
| <i>MIR3913-2</i>    | inf |
| <i>MIR1178</i>      | inf |
| <i>MIR4694</i>      | inf |
| <i>MIR4490</i>      | inf |
| <i>MIRLET7A2</i>    | inf |
| <i>MIR548AV</i>     | inf |
| <i>MIR3158-2</i>    | inf |
| <i>MIR146B</i>      | inf |
| <i>MIR4484</i>      | inf |
| <i>SNORD49A</i>     | inf |
| <i>MIR4732</i>      | inf |
| <i>MIR4728</i>      | inf |
| <i>MIR4719</i>      | inf |
| <i>SNORD64</i>      | inf |
| <i>SNORD116-24</i>  | inf |
| <i>SNORD115-4</i>   | inf |
| <i>SNORD115-28</i>  | inf |
| <i>MIR3175</i>      | inf |
| <i>MIR4707</i>      | inf |
| <i>MIR487B</i>      | inf |
| <i>SNORA28</i>      | inf |
| <i>SNORD83B</i>     | inf |

|                    |     |
|--------------------|-----|
| <i>RNU6-33P</i>    | inf |
| <i>MIR4464</i>     | inf |
| <i>MIR4442</i>     | inf |
| <i>MIR4443</i>     | inf |
| <i>MIR4262</i>     | inf |
| <i>MIR4417</i>     | inf |
| <i>MIR30C1</i>     | inf |
| <i>SNORD46</i>     | inf |
| <i>MIR557</i>      | inf |
| <i>MIR1278</i>     | inf |
| <i>MIR4671</i>     | inf |
| <i>MIR601</i>      | inf |
| <i>MIR4669</i>     | inf |
| <i>MIR3689E</i>    | inf |
| <i>MIR4292</i>     | inf |
| <i>MIR4470</i>     | inf |
| <i>MIR4661</i>     | inf |
| <i>SNORA56</i>     | inf |
| <i>SCARNA22</i>    | inf |
| <i>MIR5094</i>     | inf |
| <i>MIR342</i>      | inf |
| <i>MIR647</i>      | inf |
| <i>KRTAP19-5</i>   | inf |
| <i>SNORD70</i>     | inf |
| <i>MIR765</i>      | inf |
| <i>MIR509-3</i>    | inf |
| <i>SNORD115-45</i> | inf |
| <i>MIR3650</i>     | inf |
| <i>MIR3675</i>     | inf |
| <i>MIR1976</i>     | inf |
| <i>IFNA6</i>       | inf |
| <i>SNORA32</i>     | inf |
| <i>MIR22</i>       | inf |
| <i>MIR516B1</i>    | inf |
| <i>SNORD119</i>    | inf |
| <i>SNORD92</i>     | inf |
| <i>HIST1H2BO</i>   | inf |
| <i>MIR1260B</i>    | inf |
| <i>MIR3183</i>     | inf |
| <i>MIR4513</i>     | inf |
| <i>SNORD59B</i>    | inf |
| <i>MIR4708</i>     | inf |
| <i>MIR3925</i>     | inf |
| <i>MIR605</i>      | inf |
| <i>SNORD115-40</i> | inf |
| <i>MIR1179</i>     | inf |

|                    |     |
|--------------------|-----|
| <i>MIR643</i>      | inf |
| <i>SNORA72</i>     | inf |
| <i>MIR555</i>      | inf |
| <i>MIR1244-1</i>   | inf |
| <i>MIR148B</i>     | inf |
| <i>MIR603</i>      | inf |
| <i>SNORD4B</i>     | inf |
| <i>SNORD114-17</i> | inf |
| <i>MIR380</i>      | inf |
| <i>MIR4745</i>     | inf |
| <i>SNORD105B</i>   | inf |
| <i>SNORD88B</i>    | inf |
| <i>MIR519E</i>     | inf |
| <i>MIR516A2</i>    | inf |
| <i>MIR4325</i>     | inf |
| <i>MIR3914-1</i>   | inf |
| <i>MIR3914-2</i>   | inf |
| <i>SNORD96A</i>    | inf |
| <i>SNORD95</i>     | inf |
| <i>MIR217</i>      | inf |
| <i>MIR4436A</i>    | inf |
| <i>MIR561</i>      | inf |
| <i>MIR4255</i>     | inf |
| <i>MIR3117</i>     | inf |
| <i>MIR181B2</i>    | inf |
| <i>MIR551B</i>     | inf |
| <i>MIR3659</i>     | inf |
| <i>MIR4478</i>     | inf |
| <i>MIR2117</i>     | inf |
| <i>SNORA15</i>     | inf |
| <i>MIR511-1</i>    | inf |
| <i>MIR493</i>      | inf |
| <i>MIR1262</i>     | inf |
| <i>MIR377</i>      | inf |
| <i>MIR4775</i>     | inf |
| <i>MIR1283-1</i>   | inf |
| <i>MIR222</i>      | inf |
| <i>MIR635</i>      | inf |
| <i>SNORD116-21</i> | inf |
| <i>SNORD115-27</i> | inf |
| <i>SNORD58A</i>    | inf |
| <i>MIR644A</i>     | inf |
| <i>MIR3646</i>     | inf |
| <i>SNORD63</i>     | inf |
| <i>MIR146A</i>     | inf |
| <i>SNORA16B</i>    | inf |



|                    |       |
|--------------------|-------|
| <i>MIR483</i>      | inf   |
| <i>SNORD116-27</i> | inf   |
| <i>MIR5186</i>     | inf   |
| <i>MIR891B</i>     | inf   |
| <i>MIR508</i>      | inf   |
| <i>SNORD26</i>     | inf   |
| <i>MIR5579</i>     | inf   |
| <i>MIR553</i>      | inf   |
| <i>SNORA1</i>      | inf   |
| <i>MIR4263</i>     | inf   |
| <i>MIR3910-1</i>   | inf   |
| <i>MIR4298</i>     | inf   |
| <i>MIR4281</i>     | inf   |
| <i>SNORA62</i>     | inf   |
| <i>MIR3910-2</i>   | inf   |
| <i>KRTAP4-3</i>    | 41,03 |
| <i>OR5J2</i>       | 40,49 |
| <i>ACTRT2</i>      | 35,64 |
| <i>OR52H1</i>      | 23,22 |
| <i>OR5D18</i>      | 23,22 |
| <i>SCARNA13</i>    | 22,68 |
| <i>MIR597</i>      | 22,67 |
| <i>TMEM256</i>     | 22,41 |
| <i>MIR184</i>      | 20,51 |
| <i>SNORA77</i>     | 19,44 |
| <i>CLDN8</i>       | 19,44 |
| <i>C6orf100</i>    | 17,28 |
| <i>OR5H1</i>       | 16,20 |
| <i>HBE1</i>        | 14,85 |
| <i>OR51Q1</i>      | 14,85 |
| <i>C16orf91</i>    | 14,58 |
| <i>MC3R</i>        | 14,31 |
| <i>FAM218A</i>     | 14,04 |
| <i>SNORA67</i>     | 14,04 |
| <i>OR1L4</i>       | 13,50 |
| <i>OR10G7</i>      | 13,23 |
| <i>MIR4784</i>     | 12,96 |
| <i>OR10A5</i>      | 12,42 |
| <i>RETN</i>        | 12,31 |
| <i>H2AFX</i>       | 12,24 |
| <i>OR13J1</i>      | 12,15 |
| <i>TIMM8A</i>      | 11,52 |
| <i>SPRR2G</i>      | 11,11 |
| <i>FTH1P3</i>      | 11,07 |
| <i>NEUROG1</i>     | 10,80 |
| <i>PPBPP2</i>      | 10,80 |

|                     |       |
|---------------------|-------|
| <i>KRTAP5-11</i>    | 10,80 |
| <i>HBA1</i>         | 10,80 |
| <i>SPCS1</i>        | 10,58 |
| <i>OR5C1</i>        | 10,53 |
| <i>LOC100286922</i> | 10,08 |
| <i>OR4K15</i>       | 10,08 |
| <i>MIR29B1</i>      | 9,72  |
| <i>OR1E1</i>        | 9,72  |
| <i>SPINT4</i>       | 9,45  |
| <i>LCE1A</i>        | 9,18  |
| <i>MIR892B</i>      | 8,64  |
| <i>MIR1827</i>      | 8,64  |
| <i>MIR4514</i>      | 8,64  |
| <i>MIR516A1</i>     | 8,64  |
| <i>MIR3664</i>      | 8,64  |
| <i>SNORA58</i>      | 8,64  |
| <i>OR5H15</i>       | 8,64  |
| <i>OR9G4</i>        | 8,28  |
| <i>HIST1H2AH</i>    | 8,10  |
| <i>KT112</i>        | 8,10  |
| <i>OR51S1</i>       | 7,78  |
| <i>POU5F1B</i>      | 7,56  |
| <i>MIR376A1</i>     | 7,56  |
| <i>NAP1L2</i>       | 7,56  |
| <i>IGBP1P1</i>      | 7,41  |
| <i>PCDHGA1</i>      | 7,39  |
| <i>FAM26F</i>       | 7,38  |
| <i>OR1G1</i>        | 7,29  |
| <i>LOC1720</i>      | 7,29  |
| <i>OR3A2</i>        | 7,20  |
| <i>DEFB129</i>      | 7,13  |
| <i>KRTAP13-1</i>    | 7,13  |
| <i>OR6P1</i>        | 7,02  |
| <i>GPHA2</i>        | 7,02  |
| <i>SLC35G4</i>      | 7,02  |
| <i>SNORD35A</i>     | 7,02  |
| <i>MIR550A1</i>     | 7,02  |
| <i>SNORD24</i>      | 7,02  |
| <i>NAT8</i>         | 6,79  |
| <i>BLOC1S4</i>      | 6,75  |
| <i>OR4D11</i>       | 6,75  |
| <i>OR5T1</i>        | 6,75  |
| <i>OR4C16</i>       | 6,70  |
| <i>LOC283352</i>    | 6,69  |
| <i>LOC100270804</i> | 6,60  |
| <i>MAGEA6</i>       | 6,48  |

|                     |      |
|---------------------|------|
| <i>MIR4637</i>      | 6,48 |
| <i>SNORA2B</i>      | 6,48 |
| <i>MIR4714</i>      | 6,48 |
| <i>MIR885</i>       | 6,48 |
| <i>MIR4677</i>      | 6,48 |
| <i>SNORA74B</i>     | 6,48 |
| <i>DEFB113</i>      | 6,48 |
| <i>MIR326</i>       | 6,48 |
| <i>MIR645</i>       | 6,48 |
| <i>OR4A47</i>       | 6,48 |
| <i>SCARNA4</i>      | 6,48 |
| <i>TAAR3</i>        | 6,24 |
| <i>TPRX1</i>        | 6,21 |
| <i>ALYREF</i>       | 6,21 |
| <i>SNORA9</i>       | 6,21 |
| <i>MTRNR2L5</i>     | 6,15 |
| <i>SNORA29</i>      | 5,94 |
| <i>SNORD33</i>      | 5,94 |
| <i>LOC392452</i>    | 5,80 |
| <i>SULT1A4</i>      | 5,76 |
| <i>LOC100128573</i> | 5,76 |
| <i>RPS14P3</i>      | 5,67 |
| <i>LOC401127</i>    | 5,67 |
| <i>ZNRF2P1</i>      | 5,67 |
| <i>C16orf90</i>     | 5,52 |
| <i>CYP2A6</i>       | 5,49 |
| <i>RAD21-AS1</i>    | 5,48 |
| <i>CGB8</i>         | 5,40 |
| <i>OR5K4</i>        | 5,40 |
| <i>MIR365A</i>      | 5,40 |
| <i>MIR4257</i>      | 5,40 |
| <i>TAS2R31</i>      | 5,40 |
| <i>LOC100132781</i> | 5,40 |
| <i>FKBPL</i>        | 5,40 |
| <i>OR10T2</i>       | 5,40 |
| <i>TTC3P1</i>       | 5,40 |
| <i>TAS2R16</i>      | 5,40 |
| <i>LCE4A</i>        | 5,40 |
| <i>SNORD85</i>      | 5,40 |
| <i>MIR4763</i>      | 5,40 |
| <i>GLUD1P7</i>      | 5,40 |
| <i>MAGEB16</i>      | 5,36 |
| <i>DBIL5P2</i>      | 5,28 |
| <i>KMT2E-AS1</i>    | 5,24 |
| <i>HUS1B</i>        | 5,22 |
| <i>SNAR-A10</i>     | 5,18 |

|              |      |
|--------------|------|
| ZNF705B      | 5,18 |
| SERF1A       | 5,13 |
| SERF1B       | 5,13 |
| OR5AC2       | 5,13 |
| SCGB1D1      | 5,10 |
| ATP6V0CP3    | 5,09 |
| MKRN9P       | 5,08 |
| TPD52L3      | 5,07 |
| ACTRT1       | 4,99 |
| OR2G6        | 4,99 |
| FAM27E2      | 4,97 |
| SAA3P        | 4,95 |
| FFAR1        | 4,94 |
| HIST1H4D     | 4,86 |
| SNORD111B    | 4,86 |
| MIR378D2     | 4,86 |
| OR5L1        | 4,86 |
| LOC254128    | 4,83 |
| IGFL1        | 4,83 |
| UGT2B15      | 4,80 |
| CTAGE6       | 4,80 |
| LOC100133985 | 4,78 |
| TCEAL6       | 4,75 |
| RBMXL2       | 4,68 |
| MIR1-2       | 4,68 |
| LOC613038    | 4,68 |
| MIR4683      | 4,68 |
| POU6F2-AS1   | 4,66 |
| OR10W1       | 4,62 |
| OR52E2       | 4,59 |
| MIR657       | 4,53 |
| FERD3L       | 4,50 |
| IL36A        | 4,50 |
| ZNF32-AS1    | 4,50 |
| REG1P        | 4,48 |
| HIST1H1D     | 4,45 |
| LOC641515    | 4,45 |
| MEIS3P1      | 4,44 |
| YBX3P1       | 4,42 |
| PWAR4        | 4,32 |
| MIR3658      | 4,32 |
| MIR4288      | 4,32 |
| MIR4536-1    | 4,32 |
| MIR4639      | 4,32 |
| MIR4804      | 4,32 |
| MIR524       | 4,32 |

|                  |      |
|------------------|------|
| <i>DCAF12L1</i>  | 4,32 |
| <i>PSENN</i>     | 4,32 |
| <i>KRTAP19-1</i> | 4,32 |
| <i>MIR4467</i>   | 4,32 |
| <i>SCARNA5</i>   | 4,32 |
| <i>MIR1224</i>   | 4,32 |
| <i>MIR770</i>    | 4,32 |
| <i>OR2H2</i>     | 4,32 |
| <i>OR52B4</i>    | 4,32 |
| <i>MIR2110</i>   | 4,32 |
| <i>SNORD51</i>   | 4,32 |
| <i>HIST4H4</i>   | 4,32 |
| <i>P2RY13</i>    | 4,27 |
| <i>LAMB2P1</i>   | 4,25 |
| <i>CAPZA3</i>    | 4,24 |
| <i>SLC6A10P</i>  | 4,20 |
| <i>BTF3P11</i>   | 4,20 |
| <i>RPL7A</i>     | 4,18 |
| <i>MIR4308</i>   | 4,17 |
| <i>HIST1H2BB</i> | 4,12 |
| <i>DEFB104B</i>  | 4,10 |
| <i>MTRNR2L4</i>  | 4,10 |
| <i>FAM181B</i>   | 4,09 |
| <i>JUNB</i>      | 4,08 |
| <i>IRGM</i>      | 4,07 |
| <i>GOLGA80</i>   | 4,05 |
| <i>GPR89C</i>    | 4,05 |
| <i>OR5K2</i>     | 4,05 |
| <i>TAAR9</i>     | 4,05 |
| <i>SPAG11B</i>   | 4,05 |
| <i>GPR174</i>    | 4,05 |
| <i>SMN2</i>      | 4,05 |
| <i>SMN1</i>      | 4,05 |
| <i>HIST1H2AA</i> | 4,05 |
| <i>OR5A2</i>     | 4,05 |
| <i>CCR5</i>      | 4,05 |
| <i>TNFRSF17</i>  | 4,02 |
| <i>CXADRP2</i>   | 3,99 |
| <i>IL37</i>      | 3,98 |
| <i>OR2W5</i>     | 3,98 |
| <i>LCE3B</i>     | 3,96 |
| <i>MIR4738</i>   | 3,96 |
| <i>CEMP1</i>     | 3,96 |
| <i>GPR148</i>    | 3,96 |
| <i>RPL23P8</i>   | 3,96 |
| <i>LINC00982</i> | 3,95 |

|                  |      |
|------------------|------|
| <i>CCL4</i>      | 3,94 |
| <i>MRPL17</i>    | 3,94 |
| <i>OR52A5</i>    | 3,91 |
| <i>TSPYL6</i>    | 3,89 |
| <i>KRTAP25-1</i> | 3,89 |
| <i>SDHAF1</i>    | 3,89 |
| <i>OR5R1</i>     | 3,89 |
| <i>ZNF135</i>    | 3,88 |
| <i>KLRC2</i>     | 3,87 |
| <i>HLA-DOA</i>   | 3,87 |
| <i>LCE1B</i>     | 3,86 |
| <i>IRS4</i>      | 3,86 |
| <i>C8orf33</i>   | 3,85 |
| <i>HOXA7</i>     | 3,84 |
| <i>PWAR1</i>     | 3,83 |
| <i>NKX2-3</i>    | 3,83 |
| <i>SNORD56</i>   | 3,78 |
| <i>MIR133A1</i>  | 3,78 |
| <i>RPL21P44</i>  | 3,78 |
| <i>OR2AK2</i>    | 3,78 |
| <i>OR7D4</i>     | 3,78 |
| <i>OR5W2</i>     | 3,78 |
| <i>POU3F4</i>    | 3,78 |
| <i>HIST1H2BH</i> | 3,78 |
| <i>MIR526A1</i>  | 3,78 |
| <i>GOLGA8G</i>   | 3,78 |
| <i>SARS</i>      | 3,76 |
| <i>FOXF1</i>     | 3,76 |
| <i>BEX4</i>      | 3,73 |
| <i>OR5D13</i>    | 3,73 |
| <i>CMA1</i>      | 3,68 |
| <i>IL37</i>      | 3,68 |
| <i>OR52I1</i>    | 3,67 |
| <i>RBM5-AS1</i>  | 3,67 |
| <i>GLUD2</i>     | 3,66 |
| <i>LOC254128</i> | 3,66 |
| <i>KRTAP5-5</i>  | 3,64 |
| <i>EID2</i>      | 3,64 |
| <i>OR4K5</i>     | 3,64 |
| <i>CST2</i>      | 3,63 |
| <i>TPD52L3</i>   | 3,63 |
| <i>RPL13P5</i>   | 3,62 |
| <i>GAS1</i>      | 3,61 |
| <i>OR52N2</i>    | 3,60 |
| <i>KRTAP9-4</i>  | 3,60 |
| <i>MIR548A1</i>  | 3,60 |

|                     |      |
|---------------------|------|
| <i>REG3A</i>        | 3,60 |
| <i>REG3A</i>        | 3,60 |
| <i>C19orf73</i>     | 3,60 |
| <i>MIR4656</i>      | 3,60 |
| <i>SNORD72</i>      | 3,60 |
| <i>UQCRQ</i>        | 3,59 |
| <i>NPY5R</i>        | 3,58 |
| <i>KRT6C</i>        | 3,58 |
| <i>DLG5-AS1</i>     | 3,57 |
| <i>HULC</i>         | 3,56 |
| <i>LINC00588</i>    | 3,55 |
| <i>FAM229A</i>      | 3,55 |
| <i>CDRT15P1</i>     | 3,51 |
| <i>ERVV-1</i>       | 3,51 |
| <i>NCBP2-AS2</i>    | 3,51 |
| <i>OR8U8</i>        | 3,51 |
| <i>MAGEB1</i>       | 3,50 |
| <i>LOC100130849</i> | 3,49 |
| <i>SPANXN3</i>      | 3,49 |
| <i>OR10H4</i>       | 3,48 |
| <i>AKR1C2</i>       | 3,48 |
| <i>PCDHA9</i>       | 3,47 |
| <i>LINC00662</i>    | 3,46 |
| <i>OR2G3</i>        | 3,46 |
| <i>ZNF830</i>       | 3,46 |
| <i>SPRR1B</i>       | 3,45 |
| <i>S100A8</i>       | 3,42 |
| <i>TOB1-AS1</i>     | 3,42 |
| <i>NDUFA2</i>       | 3,41 |
| <i>HLA-DQB2</i>     | 3,39 |
| <i>OR1N2</i>        | 3,38 |
| <i>OR7G1</i>        | 3,37 |
| <i>ILF3-AS1</i>     | 3,36 |
| <i>OR6M1</i>        | 3,35 |
| <i>DARC</i>         | 3,34 |
| <i>UQCR10</i>       | 3,34 |
| <i>AQP12B</i>       | 3,32 |
| <i>ZNF733P</i>      | 3,30 |
| <i>RGPD2</i>        | 3,30 |
| <i>CD1E</i>         | 3,27 |
| <i>NDUFB4</i>       | 3,24 |
| <i>KRTAP22-2</i>    | 3,24 |
| <i>MIR149</i>       | 3,24 |
| <i>PRAMEF1</i>      | 3,24 |
| <i>BRWD1-IT2</i>    | 3,24 |
| <i>TCP11X2</i>      | 3,24 |

|                     |      |
|---------------------|------|
| <i>MIR202</i>       | 3,24 |
| <i>MIR4436B1</i>    | 3,24 |
| <i>MIR1304</i>      | 3,24 |
| <i>MIR4685</i>      | 3,24 |
| <i>MIR1539</i>      | 3,24 |
| <i>MIR4529</i>      | 3,24 |
| <i>SNORD117</i>     | 3,24 |
| <i>MIR4660</i>      | 3,24 |
| <i>FAM27L</i>       | 3,24 |
| <i>DNAJB7</i>       | 3,24 |
| <i>MIR3916</i>      | 3,24 |
| <i>LOC100303749</i> | 3,24 |
| <i>MIR766</i>       | 3,24 |
| <i>MIR617</i>       | 3,24 |
| <i>SNORD83A</i>     | 3,24 |
| <i>MIR196B</i>      | 3,24 |
| <i>MIR4275</i>      | 3,24 |
| <i>SNAR-H</i>       | 3,24 |
| <i>MIR4290</i>      | 3,24 |
| <i>OR5M9</i>        | 3,24 |
| <i>SNORA59A</i>     | 3,24 |
| <i>DTX3</i>         | 3,23 |
| <i>PDX1</i>         | 3,21 |
| <i>PLA2G2E</i>      | 3,21 |
| <i>WBP11P1</i>      | 3,20 |
| <i>ADRA2A</i>       | 3,20 |
| <i>MID1IP1</i>      | 3,20 |
| <i>OR4K14</i>       | 3,19 |
| <i>IL1RL1</i>       | 3,17 |
| <i>DKK1</i>         | 3,15 |
| <i>IFNA2</i>        | 3,15 |
| <i>TMEM155</i>      | 3,13 |
| <i>KIR3DL2</i>      | 3,13 |
| <i>OR6C3</i>        | 3,12 |
| <i>PCDHGB3</i>      | 3,11 |
| <i>OR56B4</i>       | 3,11 |
| <i>HIST1H3G</i>     | 3,10 |
| <i>CBWD3</i>        | 3,09 |
| <i>CBWD5</i>        | 3,09 |
| <i>KRT34</i>        | 3,08 |
| <i>TFF2</i>         | 3,06 |
| <i>APOE</i>         | 3,06 |
| <i>ULK4P1</i>       | 3,06 |
| <i>OR10G9</i>       | 3,06 |
| <i>C17orf97</i>     | 3,06 |
| <i>IER2</i>         | 3,06 |



|                  |      |
|------------------|------|
| <i>LINC00173</i> | 3,06 |
| <i>NCF1B</i>     | 3,05 |
| <i>PURG</i>      | 3,05 |
| <i>MAGEE2</i>    | 3,04 |
| <i>PYDC1</i>     | 3,04 |
| <i>COX8C</i>     | 3,02 |
| <i>CAMP</i>      | 3,02 |
| <i>MIR136</i>    | 3,02 |
| <i>MIR5691</i>   | 3,02 |
| <i>HOXB9</i>     | 3,02 |
| <i>TAF10</i>     | 3,01 |
| <i>APOC1P1</i>   | 3,00 |
| <i>TMEM257</i>   | 3,00 |
| <i>HES3</i>      | 3,00 |
| <i>LY6G6F</i>    | 2,99 |
| <i>OR10R2</i>    | 2,97 |
| <i>MIR3684</i>   | 2,97 |
| <i>PNMA5</i>     | 2,95 |
| <i>OR4Q3</i>     | 2,95 |
| <i>TIMM8A</i>    | 2,95 |
| <i>PDZD11</i>    | 2,94 |
| <i>CARD18</i>    | 2,93 |
| <i>HIST1H1B</i>  | 2,93 |
| <i>GPR151</i>    | 2,92 |
| <i>LHB</i>       | 2,91 |
| <i>RNASE3</i>    | 2,91 |
| <i>C10orf40</i>  | 2,90 |
| <i>OR9Q2</i>     | 2,90 |
| <i>C3orf36</i>   | 2,89 |
| <i>ASPRV1</i>    | 2,88 |
| <i>MIR4672</i>   | 2,88 |
| <i>SPIN2A</i>    | 2,88 |
| <i>GPR45</i>     | 2,88 |
| <i>MIR5193</i>   | 2,88 |
| <i>MIR602</i>    | 2,88 |
| <i>KRTAP20-3</i> | 2,88 |
| <i>PRR14</i>     | 2,87 |
| <i>LOC113230</i> | 2,86 |
| <i>CSN3</i>      | 2,86 |
| <i>AQP7P3</i>    | 2,86 |
| <i>OR5B12</i>    | 2,85 |
| <i>IFNG</i>      | 2,85 |
| <i>OR3A4P</i>    | 2,84 |
| <i>OR14J1</i>    | 2,83 |
| <i>OR13C5</i>    | 2,83 |
| <i>FGFBP1</i>    | 2,83 |

|                     |      |
|---------------------|------|
| <i>TISP43</i>       | 2,83 |
| <i>TISP43</i>       | 2,83 |
| <i>LOC646743</i>    | 2,83 |
| <i>PCDHA6</i>       | 2,82 |
| <i>NLGN4Y</i>       | 2,81 |
| <i>LOC100287534</i> | 2,81 |
| <i>KIR2DL4</i>      | 2,81 |
| <i>NLGN4Y</i>       | 2,81 |
| <i>NLGN4Y</i>       | 2,81 |
| <i>NLGN4Y</i>       | 2,81 |
| <i>H3F3C</i>        | 2,81 |
| <i>ZNF32-AS2</i>    | 2,81 |
| <i>GPX8</i>         | 2,80 |
| <i>TEX38</i>        | 2,79 |
| <i>NKX2-8</i>       | 2,78 |
| <i>HLA-DRB5</i>     | 2,78 |
| <i>ADAM21P1</i>     | 2,76 |
| <i>OR2F2</i>        | 2,76 |
| <i>OR5V1</i>        | 2,76 |
| <i>LINC00516</i>    | 2,75 |
| <i>LINC00628</i>    | 2,75 |
| <i>EGFL8</i>        | 2,74 |
| <i>ABCC6</i>        | 2,73 |
| <i>LYZL6</i>        | 2,73 |
| <i>LOC286437</i>    | 2,73 |
| <i>CCL1</i>         | 2,72 |
| <i>LOC731223</i>    | 2,72 |
| <i>RBMXL3</i>       | 2,72 |
| <i>NANOG</i>        | 2,72 |
| <i>GNGT2</i>        | 2,71 |
| <i>APOA1</i>        | 2,70 |
| <i>BTNL8</i>        | 2,70 |
| <i>INGX</i>         | 2,70 |
| <i>OR7C1</i>        | 2,70 |
| <i>SCGB1B2P</i>     | 2,70 |
| <i>SLC25A52</i>     | 2,70 |
| <i>HIST1H3C</i>     | 2,70 |
| <i>LCE1F</i>        | 2,70 |
| <i>HOXD4</i>        | 2,70 |
| <i>OR52L1</i>       | 2,70 |
| <i>RPL41</i>        | 2,70 |
| <i>LOC100289511</i> | 2,70 |
| <i>RPL29P2</i>      | 2,70 |
| <i>AOAH-IT1</i>     | 2,70 |
| <i>MID1IP1</i>      | 2,70 |
| <i>SPIN2B</i>       | 2,70 |

|                  |      |
|------------------|------|
| <i>MIR629</i>    | 2,70 |
| <i>OR10H1</i>    | 2,70 |
| <i>MIR4316</i>   | 2,70 |
| <i>MIR4648</i>   | 2,70 |
| <i>SNORA5A</i>   | 2,70 |
| <i>MIR4773-2</i> | 2,70 |
| <i>SNORD30</i>   | 2,70 |
| <i>MIR4258</i>   | 2,70 |
| <i>BASP1P1</i>   | 2,70 |
| <i>SCARNA17</i>  | 2,70 |
| <i>UTY</i>       | 2,70 |
| <i>KRTAP21-3</i> | 2,70 |
| <i>UTY</i>       | 2,70 |
| <i>FAM25B</i>    | 2,70 |
| <i>FAM25G</i>    | 2,70 |
| <i>GOLGA8F</i>   | 2,70 |
| <i>SNRNP27</i>   | 2,69 |
| <i>PSMB10</i>    | 2,68 |
| <i>OR2AT4</i>    | 2,67 |
| <i>SLURP1</i>    | 2,67 |
| <i>TRAPPC1</i>   | 2,67 |
| <i>NAIP</i>      | 2,66 |
| <i>NAIP</i>      | 2,66 |
| <i>AA06</i>      | 2,66 |
| <i>ZNF549</i>    | 2,65 |
| <i>ZNF135</i>    | 2,65 |
| <i>DIO3OS</i>    | 2,65 |
| <i>TARDBP</i>    | 2,64 |
| <i>UBE2M</i>     | 2,64 |
| <i>FAM133CP</i>  | 2,64 |
| <i>ATP5G3</i>    | 2,64 |
| <i>ATP5G3</i>    | 2,64 |
| <i>PEX16</i>     | 2,64 |
| <i>RBAKDN</i>    | 2,63 |
| <i>HMG3-AS1</i>  | 2,63 |
| <i>LOC284933</i> | 2,63 |
| <i>PGLYRP2</i>   | 2,62 |
| <i>HLA-DQA2</i>  | 2,62 |
| <i>CD3EAP</i>    | 2,61 |
| <i>DDX11L2</i>   | 2,61 |
| <i>C15orf40</i>  | 2,61 |
| <i>SRP14</i>     | 2,60 |
| <i>EPC1</i>      | 2,60 |
| <i>HOXD-AS2</i>  | 2,60 |
| <i>MIR3618</i>   | 2,59 |
| <i>OR10A4</i>    | 2,59 |

|                  |      |
|------------------|------|
| <i>SNORA71A</i>  | 2,59 |
| <i>KRTAP9-9</i>  | 2,59 |
| <i>CCDC121</i>   | 2,59 |
| <i>MKRN3</i>     | 2,59 |
| <i>NHLH1</i>     | 2,57 |
| <i>OR8I2</i>     | 2,57 |
| <i>OR52R1</i>    | 2,56 |
| <i>MIR96</i>     | 2,56 |
| <i>MIR3605</i>   | 2,56 |
| <i>MIR3689A</i>  | 2,56 |
| <i>ODF3</i>      | 2,56 |
| <i>RPL29</i>     | 2,56 |
| <i>NAP1L3</i>    | 2,55 |
| <i>CNTD2</i>     | 2,55 |
| <i>ZNF705A</i>   | 2,55 |
| <i>IGFL4</i>     | 2,55 |
| <i>TRAPPC1</i>   | 2,54 |
| <i>RFPL4A</i>    | 2,54 |
| <i>PPP1R3G</i>   | 2,53 |
| <i>MIR2392</i>   | 2,52 |
| <i>MIR877</i>    | 2,52 |
| <i>MT1X</i>      | 2,52 |
| <i>RIMBP3</i>    | 2,52 |
| <i>MIR183</i>    | 2,52 |
| <i>IFITM4P</i>   | 2,52 |
| <i>OR8U1</i>     | 2,52 |
| <i>MIR4786</i>   | 2,52 |
| <i>CGB2</i>      | 2,52 |
| <i>CPS1-IT1</i>  | 2,52 |
| <i>MIR550A2</i>  | 2,52 |
| <i>ANXA2P1</i>   | 2,52 |
| <i>ADORA3</i>    | 2,51 |
| <i>AZGP1P1</i>   | 2,51 |
| <i>ID4</i>       | 2,51 |
| <i>HIF1A-AS2</i> | 2,51 |
| <i>MIR4492</i>   | 2,50 |
| <i>SH3GL1P2</i>  | 2,49 |
| <i>CXCR5</i>     | 2,49 |
| <i>OR52E4</i>    | 2,48 |
| <i>XCL2</i>      | 2,48 |
| <i>YRDC</i>      | 2,48 |
| <i>C12orf74</i>  | 2,48 |
| <i>MAGEA10</i>   | 2,46 |
| <i>HAMP</i>      | 2,45 |
| <i>OR7E2P</i>    | 2,45 |
| <i>PDZK1IP1</i>  | 2,45 |

|                     |      |
|---------------------|------|
| <i>STATH</i>        | 2,45 |
| <i>LOC100506384</i> | 2,45 |
| <i>TXNDC17</i>      | 2,45 |
| <i>TSN</i>          | 2,44 |
| <i>GDF3</i>         | 2,44 |
| <i>TMCO2</i>        | 2,44 |
| <i>CITED4</i>       | 2,44 |
| <i>FAM156B</i>      | 2,43 |
| <i>FAM156A</i>      | 2,43 |
| <i>RBM12B-AS1</i>   | 2,43 |
| <i>LCE3E</i>        | 2,43 |
| <i>SNORA70C</i>     | 2,43 |
| <i>UQCRHL</i>       | 2,43 |
| <i>OR5AN1</i>       | 2,43 |
| <i>SERP1</i>        | 2,43 |
| <i>POU4F1</i>       | 2,42 |
| <i>GNGT2</i>        | 2,42 |
| <i>C6orf141</i>     | 2,42 |
| <i>CXCL11</i>       | 2,42 |
| <i>HIST2H2BE</i>    | 2,42 |
| <i>TSPO2</i>        | 2,41 |
| <i>CUTA</i>         | 2,41 |
| <i>DOCK9-AS2</i>    | 2,41 |
| <i>MDH2</i>         | 2,41 |
| <i>NPIP3</i>        | 2,40 |
| <i>SPRR2F</i>       | 2,40 |
| <i>GAGE2C</i>       | 2,40 |
| <i>SHISA9</i>       | 2,40 |
| <i>CCL7</i>         | 2,39 |
| <i>FOXC1</i>        | 2,39 |
| <i>NPTN-IT1</i>     | 2,38 |
| <i>SIKE1</i>        | 2,38 |
| <i>GSX1</i>         | 2,38 |
| <i>OR4D2</i>        | 2,38 |
| <i>LOC100288911</i> | 2,38 |
| <i>OR12D2</i>       | 2,38 |
| <i>KRTAP10-8</i>    | 2,38 |
| <i>NKRF</i>         | 2,37 |
| <i>GNGT2</i>        | 2,37 |
| <i>CCDC121</i>      | 2,37 |
| <i>TAPSAR1</i>      | 2,36 |
| <i>AOC3</i>         | 2,36 |
| <i>UTP3</i>         | 2,36 |
| <i>SNAR-E</i>       | 2,36 |
| <i>KBTBD13</i>      | 2,36 |
| <i>LRR30</i>        | 2,36 |

|                      |      |
|----------------------|------|
| <i>PCED1B-AS1</i>    | 2,36 |
| <i>C17orf112</i>     | 2,36 |
| <i>DKFZp434J0226</i> | 2,36 |
| <i>MYF6</i>          | 2,36 |
| <i>PNMA5</i>         | 2,34 |
| <i>MPHOSPH10</i>     | 2,34 |
| <i>IRX2</i>          | 2,34 |
| <i>MRGPRX1</i>       | 2,34 |
| <i>TSHB</i>          | 2,33 |
| <i>LOC100129520</i>  | 2,33 |
| <i>RIPPLY1</i>       | 2,33 |
| <i>CDV3</i>          | 2,32 |
| <i>PFN1</i>          | 2,32 |
| <i>PCDHA1</i>        | 2,32 |
| <i>BCAS2</i>         | 2,32 |
| <i>ZNF224</i>        | 2,32 |
| <i>GSPT2</i>         | 2,32 |
| <i>CDV3</i>          | 2,31 |
| <i>NPBWR2</i>        | 2,31 |
| <i>HOXC-AS1</i>      | 2,31 |
| <i>LOC100288778</i>  | 2,31 |
| <i>LOC100506076</i>  | 2,31 |
| <i>GATA3-AS1</i>     | 2,31 |
| <i>TMEM86A</i>       | 2,31 |
| <i>ELOVL3</i>        | 2,31 |
| <i>APEH</i>          | 2,31 |
| <i>PMAIP1</i>        | 2,31 |
| <i>CH25H</i>         | 2,31 |
| <i>KIR3DL1</i>       | 2,31 |
| <i>LINC00173</i>     | 2,31 |
| <i>MIR4276</i>       | 2,30 |
| <i>PMS2L2</i>        | 2,30 |
| <i>LOC286359</i>     | 2,30 |
| <i>OR10A6</i>        | 2,29 |
| <i>LINC00852</i>     | 2,29 |
| <i>GHSR</i>          | 2,29 |
| <i>ZNRF4</i>         | 2,29 |
| <i>C1QTNF4</i>       | 2,28 |
| <i>CETN4P</i>        | 2,28 |
| <i>ECSCR</i>         | 2,28 |
| <i>SAMD15</i>        | 2,28 |
| <i>PITX2</i>         | 2,28 |
| <i>ASPHD1</i>        | 2,28 |
| <i>MIR612</i>        | 2,28 |
| <i>LOC100506328</i>  | 2,28 |
| <i>KLK12</i>         | 2,27 |

|                     |      |
|---------------------|------|
| <i>OR6C6</i>        | 2,27 |
| <i>LOC100130451</i> | 2,27 |
| <i>POU4F3</i>       | 2,27 |
| <i>SEMG1</i>        | 2,27 |
| <i>CKMT1B</i>       | 2,27 |
| <i>MIR148A</i>      | 2,27 |
| <i>LDHAL6B</i>      | 2,26 |
| <i>TSPO2</i>        | 2,26 |
| <i>FAM138D</i>      | 2,26 |
| <i>FAM187B</i>      | 2,26 |
| <i>TTC36</i>        | 2,26 |
| <i>RNF223</i>       | 2,26 |
| <i>C3orf72</i>      | 2,25 |
| <i>GPR52</i>        | 2,25 |
| <i>PRSS2</i>        | 2,25 |
| <i>RLN2</i>         | 2,25 |
| <i>PGBD4</i>        | 2,25 |
| <i>OR6N1</i>        | 2,25 |
| <i>RSPO1</i>        | 2,24 |
| <i>ZNF256</i>       | 2,24 |
| <i>C17orf47</i>     | 2,24 |
| <i>FOXR2</i>        | 2,24 |
| <i>TAAR6</i>        | 2,24 |
| <i>HOXD11</i>       | 2,24 |
| <i>LINC00661</i>    | 2,23 |
| <i>DNAJC4</i>       | 2,23 |
| <i>KCNMB1</i>       | 2,23 |
| <i>HPS6</i>         | 2,23 |
| <i>HOXB2</i>        | 2,23 |
| <i>MAGEB18</i>      | 2,22 |
| <i>RPL13AP3</i>     | 2,22 |
| <i>P2RY4</i>        | 2,22 |
| <i>KRT79</i>        | 2,22 |
| <i>SPATA8-AS1</i>   | 2,22 |
| <i>OMP</i>          | 2,21 |
| <i>KRT33B</i>       | 2,21 |
| <i>CLK2P</i>        | 2,21 |
| <i>RPL37A</i>       | 2,21 |
| <i>SUMO1P3</i>      | 2,21 |
| <i>CCDC85B</i>      | 2,20 |
| <i>UBQLNL</i>       | 2,20 |
| <i>TLR9</i>         | 2,20 |
| <i>GLYCAM1</i>      | 2,19 |
| <i>CLDND1</i>       | 2,19 |
| <i>GPX6</i>         | 2,19 |
| <i>RAET1E</i>       | 2,19 |

|                     |      |
|---------------------|------|
| <i>TPI1</i>         | 2,19 |
| <i>PCDHB1</i>       | 2,19 |
| <i>PET100</i>       | 2,19 |
| <i>RHOV</i>         | 2,19 |
| <i>HLA-G</i>        | 2,18 |
| <i>LILRB2</i>       | 2,18 |
| <i>LILRB2</i>       | 2,18 |
| <i>LILRB2</i>       | 2,18 |
| <i>LILRB2</i>       | 2,18 |
| <i>NXF3</i>         | 2,18 |
| <i>C4orf33</i>      | 2,18 |
| <i>SPEF1</i>        | 2,18 |
| <i>SNORA49</i>      | 2,16 |
| <i>MIR139</i>       | 2,16 |
| <i>SNORD4A</i>      | 2,16 |
| <i>SNORD34</i>      | 2,16 |
| <i>MIRLET7C</i>     | 2,16 |
| <i>HBG2</i>         | 2,16 |
| <i>MIR224</i>       | 2,16 |
| <i>MIR5100</i>      | 2,16 |
| <i>MIR190A</i>      | 2,16 |
| <i>MIR4309</i>      | 2,16 |
| <i>SBSN</i>         | 2,16 |
| <i>LOC100289092</i> | 2,16 |
| <i>SNORD69</i>      | 2,16 |
| <i>MIR4273</i>      | 2,16 |
| <i>IFNA8</i>        | 2,16 |
| <i>LOC729080</i>    | 2,16 |
| <i>LOC284379</i>    | 2,16 |
| <i>MIR24-2</i>      | 2,16 |
| <i>MOBP</i>         | 2,16 |
| <i>MIR4733</i>      | 2,16 |
| <i>MIR203</i>       | 2,16 |
| <i>MIR3545</i>      | 2,16 |
| <i>MIR432</i>       | 2,16 |
| <i>CCDC163P</i>     | 2,16 |
| <i>GNLY</i>         | 2,16 |
| <i>CRB3</i>         | 2,16 |
| <i>ZNF654</i>       | 2,16 |
| <i>MIR23B</i>       | 2,16 |
| <i>SSNA1</i>        | 2,16 |
| <i>MIR15B</i>       | 2,16 |
| <i>HILS1</i>        | 2,16 |
| <i>SORCS3-AS1</i>   | 2,16 |
| <i>LINC00957</i>    | 2,16 |
| <i>LOC441455</i>    | 2,16 |



|                     |      |
|---------------------|------|
| <i>MIR3187</i>      | 2,16 |
| <i>OR9G1</i>        | 2,16 |
| <i>SEMG2</i>        | 2,16 |
| <i>RNASE13</i>      | 2,16 |
| <i>MMP23A</i>       | 2,16 |
| <i>FAM72A</i>       | 2,16 |
| <i>LOC643486</i>    | 2,16 |
| <i>SPACA5</i>       | 2,16 |
| <i>HGD</i>          | 2,16 |
| <i>GOLGA8EP</i>     | 2,16 |
| <i>NEUROG3</i>      | 2,16 |
| <i>USP17L4</i>      | 2,16 |
| <i>CDRT7</i>        | 2,16 |
| <i>MIR1264</i>      | 2,16 |
| <i>MIR891A</i>      | 2,16 |
| <i>RNU6-67P</i>     | 2,16 |
| <i>MIR506</i>       | 2,16 |
| <i>MIR4705</i>      | 2,16 |
| <i>MIR1228</i>      | 2,16 |
| <i>MIR1469</i>      | 2,16 |
| <i>MIR381</i>       | 2,16 |
| <i>SNORD110</i>     | 2,16 |
| <i>MIR4468</i>      | 2,16 |
| <i>MIR153-1</i>     | 2,16 |
| <i>MIR4286</i>      | 2,16 |
| <i>OR2T3</i>        | 2,16 |
| <i>OR2T34</i>       | 2,16 |
| <i>LOC729737</i>    | 2,16 |
| <i>LOC100652736</i> | 2,16 |
| <i>HBZ</i>          | 2,16 |
| <i>TBC1D3H</i>      | 2,16 |
| <i>VN1R10P</i>      | 2,16 |
| <i>FAM225B</i>      | 2,16 |
| <i>SNORD116-18</i>  | 2,16 |
| <i>MIR574</i>       | 2,16 |
| <i>CD3E</i>         | 2,15 |
| <i>MRPL9</i>        | 2,15 |
| <i>C4orf33</i>      | 2,15 |
| <i>FAM87A</i>       | 2,15 |
| <i>PSMB8</i>        | 2,15 |
| <i>PLA2G2D</i>      | 2,14 |
| <i>ASAH2B</i>       | 2,14 |
| <i>GADD45GIP1</i>   | 2,14 |
| <i>FOXP3</i>        | 2,14 |
| <i>ZNF737</i>       | 2,14 |
| <i>MTCP1</i>        | 2,13 |

|                       |      |
|-----------------------|------|
| <i>SMR3B</i>          | 2,13 |
| <i>TCONS_00024492</i> | 2,13 |
| <i>CTSLP8</i>         | 2,13 |
| <i>BOLA3-AS1</i>      | 2,13 |
| <i>ALKBH4</i>         | 2,13 |
| <i>C11orf91</i>       | 2,12 |
| <i>S1PR5</i>          | 2,12 |
| <i>JPH3</i>           | 2,12 |
| <i>PCDHA10</i>        | 2,12 |
| <i>C16orf13</i>       | 2,12 |
| <i>CTGF</i>           | 2,12 |
| <i>PMCH</i>           | 2,12 |
| <i>MRPL11</i>         | 2,12 |
| <i>FAM71E1</i>        | 2,11 |
| <i>OR2K2</i>          | 2,11 |
| <i>CKMT1A</i>         | 2,11 |
| <i>NKX6-1</i>         | 2,11 |
| <i>RNF26</i>          | 2,10 |
| <i>SPACA4</i>         | 2,10 |
| <i>OR52M1</i>         | 2,10 |
| <i>SCGB2A2</i>        | 2,10 |
| <i>OR13C9</i>         | 2,10 |
| <i>ZNF80</i>          | 2,10 |
| <i>BTG1</i>           | 2,09 |
| <i>LOC440905</i>      | 2,09 |
| <i>FAM72B</i>         | 2,09 |
| <i>C3orf80</i>        | 2,09 |
| <i>ATP6V1F</i>        | 2,09 |
| <i>APOBEC3C</i>       | 2,09 |
| <i>TMEM31</i>         | 2,09 |
| <i>CITED1</i>         | 2,09 |
| <i>RPS12</i>          | 2,09 |
| <i>CHPF</i>           | 2,09 |
| <i>LOC100996758</i>   | 2,09 |
| <i>ALB</i>            | 2,09 |
| <i>FOXD2-AS1</i>      | 2,09 |
| <i>HMGB4</i>          | 2,08 |
| <i>SDR39U1</i>        | 2,08 |
| <i>ASCL2</i>          | 2,08 |
| <i>LOC653501</i>      | 2,08 |
| <i>LOC440896</i>      | 2,08 |
| <i>OR56A1</i>         | 2,08 |
| <i>SYCE1</i>          | 2,08 |
| <i>HCRT</i>           | 2,07 |
| <i>KLHDC7A</i>        | 2,07 |
| <i>C11orf1</i>        | 2,07 |

|                  |      |
|------------------|------|
| <i>PRNT</i>      | 2,07 |
| <i>KRT14</i>     | 2,07 |
| <i>BOD1L2</i>    | 2,07 |
| <i>MED18</i>     | 2,07 |
| <i>PGA3</i>      | 2,07 |
| <i>CXorf40A</i>  | 2,06 |
| <i>MSGN1</i>     | 2,06 |
| <i>BCL2</i>      | 2,06 |
| <i>MRPL16</i>    | 2,06 |
| <i>FGF8</i>      | 2,06 |
| <i>ZFP92</i>     | 2,05 |
| <i>DRD1</i>      | 2,05 |
| <i>C9orf66</i>   | 2,05 |
| <i>CLEC10A</i>   | 2,05 |
| <i>TSPAN6</i>    | 2,05 |
| <i>LINC00421</i> | 2,05 |
| <i>PAGE2B</i>    | 2,04 |
| <i>TWF1</i>      | 2,04 |
| <i>GNRH2</i>     | 2,04 |
| <i>CNPPD1</i>    | 2,04 |
| <i>GALR3</i>     | 2,04 |
| <i>FKSG29</i>    | 2,04 |
| <i>OR7E12P</i>   | 2,04 |
| <i>ZNF619</i>    | 2,04 |
| <i>HLA-DOB</i>   | 2,04 |
| <i>LIM2</i>      | 2,04 |
| <i>FLJ26245</i>  | 2,04 |
| <i>PAGR1</i>     | 2,03 |
| <i>TMEM88</i>    | 2,03 |
| <i>OR10Z1</i>    | 2,03 |
| <i>ANXA2P3</i>   | 2,02 |
| <i>RNF5</i>      | 2,02 |
| <i>AGAP4</i>     | 2,02 |
| <i>TREM1</i>     | 2,02 |
| <i>OR4K1</i>     | 2,02 |
| <i>GUSBP9</i>    | 2,02 |
| <i>SKIV2L</i>    | 2,02 |
| <i>LINC00893</i> | 2,02 |
| <i>KRTDAP</i>    | 2,02 |
| <i>PTHLH</i>     | 2,02 |
| <i>FOXS1</i>     | 2,02 |
| <i>HINFP</i>     | 2,02 |
| <i>ESRP2</i>     | 2,02 |
| <i>TCF15</i>     | 2,02 |
| <i>SPINK14</i>   | 2,01 |
| <i>PKI55</i>     | 2,01 |

|                     |      |
|---------------------|------|
| <i>PLA2G12A</i>     | 2,01 |
| <i>CD207</i>        | 2,01 |
| <i>NEFM</i>         | 2,01 |
| <i>AMT</i>          | 2,01 |
| <i>C1GALT1C1</i>    | 2,01 |
| <i>CLECL1</i>       | 2,01 |
| <i>RING1</i>        | 2,00 |
| <i>IL10RA</i>       | 2,00 |
| <i>IMP3</i>         | 0,50 |
| <i>RCOR2</i>        | 0,50 |
| <i>CALCA</i>        | 0,50 |
| <i>SNORD114-20</i>  | 0,50 |
| <i>OR6C65</i>       | 0,50 |
| <i>SCGB2B3P</i>     | 0,50 |
| <i>HYI</i>          | 0,50 |
| <i>ZBTB3</i>        | 0,50 |
| <i>TRIM49B</i>      | 0,50 |
| <i>GJD2</i>         | 0,50 |
| <i>LHX1</i>         | 0,50 |
| <i>LOC100268168</i> | 0,50 |
| <i>CPT1B</i>        | 0,50 |
| <i>LAGE3</i>        | 0,50 |
| <i>NR1I3</i>        | 0,50 |
| <i>CDCA3</i>        | 0,50 |
| <i>sept-05</i>      | 0,50 |
| <i>GLIS3-AS1</i>    | 0,50 |
| <i>OR5AS1</i>       | 0,49 |
| <i>MCL1</i>         | 0,49 |
| <i>LOC100268168</i> | 0,49 |
| <i>LOC100288069</i> | 0,49 |
| <i>ZXDB</i>         | 0,49 |
| <i>C7orf49</i>      | 0,49 |
| <i>LYPD5</i>        | 0,49 |
| <i>COMTD1</i>       | 0,49 |
| <i>AQP12A</i>       | 0,49 |
| <i>GH2</i>          | 0,49 |
| <i>ATP7A</i>        | 0,49 |
| <i>GSN-AS1</i>      | 0,49 |
| <i>STAG3L3</i>      | 0,49 |
| <i>CAMK2N2</i>      | 0,49 |
| <i>OR2T1</i>        | 0,49 |
| <i>HMX3</i>         | 0,49 |
| <i>ANXA8</i>        | 0,49 |
| <i>DUX4</i>         | 0,49 |
| <i>TRIM73</i>       | 0,49 |
| <i>TRIM74</i>       | 0,49 |

|                   |      |
|-------------------|------|
| <i>KRTAP4-6</i>   | 0,49 |
| <i>C4A</i>        | 0,49 |
| <i>C4B_2</i>      | 0,49 |
| <i>OR10Q1</i>     | 0,49 |
| <i>PIK3R1</i>     | 0,49 |
| <i>OXL1</i>       | 0,49 |
| <i>NKAPL</i>      | 0,49 |
| <i>RPL15</i>      | 0,49 |
| <i>MRP63</i>      | 0,49 |
| <i>CXCR2</i>      | 0,49 |
| <i>DLX1</i>       | 0,49 |
| <i>RDH14</i>      | 0,49 |
| <i>C8orf86</i>    | 0,49 |
| <i>KLHL38</i>     | 0,49 |
| <i>BLOC1S1</i>    | 0,49 |
| <i>TLR8</i>       | 0,49 |
| <i>LOC653712</i>  | 0,49 |
| <i>DNASE1L2</i>   | 0,49 |
| <i>CDK4</i>       | 0,49 |
| <i>LRRC2-AS1</i>  | 0,49 |
| <i>NRG1-IT3</i>   | 0,49 |
| <i>CXorf64</i>    | 0,49 |
| <i>MIR4285</i>    | 0,49 |
| <i>MIR4269</i>    | 0,49 |
| <i>PRR24</i>      | 0,49 |
| <i>ATXN3L</i>     | 0,49 |
| <i>FAM115A</i>    | 0,49 |
| <i>NPW</i>        | 0,48 |
| <i>CHKB-CPT1B</i> | 0,48 |
| <i>SPDYE4</i>     | 0,48 |
| <i>HBBP1</i>      | 0,48 |
| <i>ARF6</i>       | 0,48 |
| <i>MIR3065</i>    | 0,48 |
| <i>MIR338</i>     | 0,48 |
| <i>PIP5KL1</i>    | 0,48 |
| <i>SNRPD2</i>     | 0,48 |
| <i>IL2RG</i>      | 0,48 |
| <i>LPP-AS2</i>    | 0,48 |
| <i>PINLYP</i>     | 0,48 |
| <i>TIGD2</i>      | 0,48 |
| <i>CXCR4</i>      | 0,48 |
| <i>RDH8</i>       | 0,48 |
| <i>HAGHL</i>      | 0,48 |
| <i>CD300LD</i>    | 0,48 |
| <i>RPL15</i>      | 0,48 |
| <i>CCL15</i>      | 0,48 |

|                  |      |
|------------------|------|
| <i>C17orf77</i>  | 0,48 |
| <i>HMGB1</i>     | 0,48 |
| <i>MORN2</i>     | 0,48 |
| <i>CYB561D1</i>  | 0,48 |
| <i>CYB561D1</i>  | 0,48 |
| <i>SNORA68</i>   | 0,48 |
| <i>MFAP2</i>     | 0,48 |
| <i>GH1</i>       | 0,48 |
| <i>CFL2</i>      | 0,48 |
| <i>MS4A6E</i>    | 0,48 |
| <i>MIR520F</i>   | 0,48 |
| <i>MIR921</i>    | 0,48 |
| <i>WNT1</i>      | 0,48 |
| <i>RAB3A</i>     | 0,48 |
| <i>PCDHGB5</i>   | 0,48 |
| <i>FOXC2</i>     | 0,48 |
| <i>HSPB3</i>     | 0,48 |
| <i>RNF224</i>    | 0,48 |
| <i>MOSPD3</i>    | 0,48 |
| <i>RGS1</i>      | 0,48 |
| <i>RPL15</i>     | 0,48 |
| <i>TAAR2</i>     | 0,48 |
| <i>OBP2B</i>     | 0,48 |
| <i>ZNF296</i>    | 0,48 |
| <i>BST2</i>      | 0,48 |
| <i>C10orf12</i>  | 0,48 |
| <i>B4GALT3</i>   | 0,48 |
| <i>GALT</i>      | 0,48 |
| <i>HOXC-AS2</i>  | 0,48 |
| <i>RPL15</i>     | 0,48 |
| <i>SOX10</i>     | 0,48 |
| <i>DEFB136</i>   | 0,48 |
| <i>RAN</i>       | 0,48 |
| <i>SPRR2D</i>    | 0,48 |
| <i>NEURL2</i>    | 0,47 |
| <i>CHRNG</i>     | 0,47 |
| <i>PART1</i>     | 0,47 |
| <i>MFAP2</i>     | 0,47 |
| <i>TRERNA1</i>   | 0,47 |
| <i>TFDP3</i>     | 0,47 |
| <i>RAET1L</i>    | 0,47 |
| <i>TMEM121</i>   | 0,47 |
| <i>ATF3</i>      | 0,47 |
| <i>PTPRCAP</i>   | 0,47 |
| <i>LOC284578</i> | 0,47 |
| <i>TMEM52</i>    | 0,47 |

|                     |      |
|---------------------|------|
| <i>HOXC6</i>        | 0,47 |
| <i>sept-12</i>      | 0,47 |
| <i>NDUFA6</i>       | 0,47 |
| <i>SUPT20HL2</i>    | 0,47 |
| <i>DEFB127</i>      | 0,47 |
| <i>FAM74A3</i>      | 0,47 |
| <i>HRG</i>          | 0,47 |
| <i>CALML5</i>       | 0,47 |
| <i>MIR5189</i>      | 0,47 |
| <i>ARL6IP4</i>      | 0,47 |
| <i>POLR1C</i>       | 0,47 |
| <i>TNXB</i>         | 0,47 |
| <i>C1orf122</i>     | 0,47 |
| <i>BPIFA4P</i>      | 0,47 |
| <i>ASIC1</i>        | 0,47 |
| <i>CPT1B</i>        | 0,47 |
| <i>C7orf25</i>      | 0,46 |
| <i>MAF1</i>         | 0,46 |
| <i>LINC01015</i>    | 0,46 |
| <i>SNORD91A</i>     | 0,46 |
| <i>LRRC37A2</i>     | 0,46 |
| <i>CDC14C</i>       | 0,46 |
| <i>RNF181</i>       | 0,46 |
| <i>FAM115C</i>      | 0,46 |
| <i>MESP1</i>        | 0,46 |
| <i>ARL17A</i>       | 0,46 |
| <i>TK1</i>          | 0,46 |
| <i>LRP5L</i>        | 0,46 |
| <i>MRPL10</i>       | 0,46 |
| <i>HCG22</i>        | 0,46 |
| <i>C2orf68</i>      | 0,46 |
| <i>SS18L2</i>       | 0,46 |
| <i>GAMT</i>         | 0,46 |
| <i>NXNL2</i>        | 0,46 |
| <i>LTA</i>          | 0,46 |
| <i>LOC100506795</i> | 0,46 |
| <i>APOBEC3H</i>     | 0,46 |
| <i>IL1F10</i>       | 0,46 |
| <i>TIGD7</i>        | 0,46 |
| <i>LOC400685</i>    | 0,46 |
| <i>DGCR10</i>       | 0,46 |
| <i>RNF215</i>       | 0,46 |
| <i>LOC100131094</i> | 0,46 |
| <i>CCDC177</i>      | 0,46 |
| <i>PABPC1L2A</i>    | 0,46 |
| <i>GJA10</i>        | 0,45 |

|                     |      |
|---------------------|------|
| <i>HEIH</i>         | 0,45 |
| <i>USE1</i>         | 0,45 |
| <i>RNASEK</i>       | 0,45 |
| <i>TCAP</i>         | 0,45 |
| <i>EGR4</i>         | 0,45 |
| <i>OR13F1</i>       | 0,45 |
| <i>KGFLP1</i>       | 0,45 |
| <i>SNORA63</i>      | 0,45 |
| <i>IL17C</i>        | 0,45 |
| <i>POLR2L</i>       | 0,45 |
| <i>NBPF24</i>       | 0,45 |
| <i>RPS15AP10</i>    | 0,45 |
| <i>NBPF11</i>       | 0,45 |
| <i>NBPF24</i>       | 0,45 |
| <i>OR13C8</i>       | 0,45 |
| <i>MT1DP</i>        | 0,45 |
| <i>CCDC166</i>      | 0,45 |
| <i>LILRB4</i>       | 0,45 |
| <i>GCHFR</i>        | 0,45 |
| <i>SPZ1</i>         | 0,45 |
| <i>FLJ44313</i>     | 0,45 |
| <i>RHOB</i>         | 0,45 |
| <i>SHISA4</i>       | 0,45 |
| <i>SHISA4</i>       | 0,45 |
| <i>C1orf64</i>      | 0,44 |
| <i>RNF103</i>       | 0,44 |
| <i>NANOS2</i>       | 0,44 |
| <i>C1orf180</i>     | 0,44 |
| <i>FBXL6</i>        | 0,44 |
| <i>KBTBD6</i>       | 0,44 |
| <i>PLA2G7</i>       | 0,44 |
| <i>IER5</i>         | 0,44 |
| <i>MT1JP</i>        | 0,44 |
| <i>LOC283070</i>    | 0,44 |
| <i>MED21</i>        | 0,44 |
| <i>SERTAD4-AS1</i>  | 0,44 |
| <i>ENPP5</i>        | 0,44 |
| <i>LTC4S</i>        | 0,44 |
| <i>LOC100287632</i> | 0,44 |
| <i>PIGY</i>         | 0,44 |
| <i>RPP21</i>        | 0,44 |
| <i>ORM1</i>         | 0,44 |
| <i>VSX1</i>         | 0,44 |
| <i>LOC100287177</i> | 0,44 |
| <i>SLC10A3</i>      | 0,44 |
| <i>C4orf48</i>      | 0,44 |



|                     |      |
|---------------------|------|
| <i>BET1L</i>        | 0,44 |
| <i>SNTN</i>         | 0,44 |
| <i>TINF2</i>        | 0,44 |
| <i>PHGR1</i>        | 0,43 |
| <i>KCND1</i>        | 0,43 |
| <i>MESTIT1</i>      | 0,43 |
| <i>CENPT</i>        | 0,43 |
| <i>SNORD114-12</i>  | 0,43 |
| <i>HLA-DRB6</i>     | 0,43 |
| <i>EPHX3</i>        | 0,43 |
| <i>MIR5089</i>      | 0,43 |
| <i>MYADML</i>       | 0,43 |
| <i>NKX2-2</i>       | 0,43 |
| <i>SNORD10</i>      | 0,43 |
| <i>MIR188</i>       | 0,43 |
| <i>MIR518F</i>      | 0,43 |
| <i>MIR4759</i>      | 0,43 |
| <i>MIR1297</i>      | 0,43 |
| <i>MIR4681</i>      | 0,43 |
| <i>SNORD18C</i>     | 0,43 |
| <i>MIR4519</i>      | 0,43 |
| <i>SNORD101</i>     | 0,43 |
| <i>SNORA66</i>      | 0,43 |
| <i>OR2W3</i>        | 0,43 |
| <i>DPRXP4</i>       | 0,43 |
| <i>LOC100129917</i> | 0,43 |
| <i>POC1B-GALNT4</i> | 0,43 |
| <i>FAM92A1P2</i>    | 0,43 |
| <i>KPNA2</i>        | 0,43 |
| <i>C22orf42</i>     | 0,43 |
| <i>LOC146481</i>    | 0,43 |
| <i>LOC348761</i>    | 0,43 |
| <i>PLA2G7</i>       | 0,43 |
| <i>CCL14</i>        | 0,43 |
| <i>LINC00161</i>    | 0,43 |
| <i>DLEU2L</i>       | 0,43 |
| <i>LINC00092</i>    | 0,43 |
| <i>TMEM211</i>      | 0,43 |
| <i>SLC7A6OS</i>     | 0,43 |
| <i>GTSE1-AS1</i>    | 0,43 |
| <i>SCAND1</i>       | 0,42 |
| <i>IFITM3</i>       | 0,42 |
| <i>LINC00657</i>    | 0,42 |
| <i>GSTM4</i>        | 0,42 |
| <i>CCDC153</i>      | 0,42 |
| <i>IFNA22P</i>      | 0,42 |

|                   |      |
|-------------------|------|
| <i>ATOH7</i>      | 0,42 |
| <i>PRSS8</i>      | 0,42 |
| <i>APOBEC3H</i>   | 0,42 |
| <i>NAT14</i>      | 0,42 |
| <i>OR5D14</i>     | 0,42 |
| <i>NHLRC4</i>     | 0,42 |
| <i>TSPY26P</i>    | 0,42 |
| <i>SLC9A9-AS1</i> | 0,42 |
| <i>TUBB2B</i>     | 0,42 |
| <i>MAD2L1</i>     | 0,42 |
| <i>PARD6A</i>     | 0,42 |
| <i>POLR2J</i>     | 0,42 |
| <i>TUBB</i>       | 0,42 |
| <i>RAET1G</i>     | 0,42 |
| <i>FJX1</i>       | 0,42 |
| <i>NRARP</i>      | 0,42 |
| <i>ARMCX3</i>     | 0,42 |
| <i>MGC34796</i>   | 0,42 |
| <i>MGC16025</i>   | 0,42 |
| <i>LGALS1</i>     | 0,42 |
| <i>FAM35BP</i>    | 0,42 |
| <i>TRIM49C</i>    | 0,42 |
| <i>TPSAB1</i>     | 0,42 |
| <i>OR7D2</i>      | 0,42 |
| <i>OR2A5</i>      | 0,42 |
| <i>CTAGE10P</i>   | 0,42 |
| <i>FAM86EP</i>    | 0,41 |
| <i>UPK1A-AS1</i>  | 0,41 |
| <i>FEZ1</i>       | 0,41 |
| <i>EPHX3</i>      | 0,41 |
| <i>LINC00577</i>  | 0,41 |
| <i>CRHR1-IT1</i>  | 0,41 |
| <i>ZBED2</i>      | 0,41 |
| <i>KRT37</i>      | 0,41 |
| <i>LOC645434</i>  | 0,41 |
| <i>OXCT2</i>      | 0,41 |
| <i>GDNF-AS1</i>   | 0,41 |
| <i>IRG1</i>       | 0,41 |
| <i>NUTM2D</i>     | 0,41 |
| <i>MAGEE1</i>     | 0,41 |
| <i>TREML4</i>     | 0,41 |
| <i>FAM83E</i>     | 0,41 |
| <i>FZD10</i>      | 0,41 |
| <i>LOC646903</i>  | 0,41 |
| <i>APOA2</i>      | 0,41 |
| <i>MIR589</i>     | 0,41 |

|                     |      |
|---------------------|------|
| <i>LINC00618</i>    | 0,41 |
| <i>CYP1A1</i>       | 0,41 |
| <i>NUDT8</i>        | 0,41 |
| <i>NUDT8</i>        | 0,41 |
| <i>LINC01023</i>    | 0,41 |
| <i>OR52N5</i>       | 0,41 |
| <i>HIST3H3</i>      | 0,41 |
| <i>SNORA71D</i>     | 0,41 |
| <i>ARMCX3</i>       | 0,41 |
| <i>MIR2682</i>      | 0,41 |
| <i>SOX3</i>         | 0,41 |
| <i>LGALS9B</i>      | 0,40 |
| <i>SPAG11A</i>      | 0,40 |
| <i>MIR4793</i>      | 0,40 |
| <i>MIR556</i>       | 0,40 |
| <i>MIR4679-2</i>    | 0,40 |
| <i>MIR4679-1</i>    | 0,40 |
| <i>SNORA69</i>      | 0,40 |
| <i>HDGFL1</i>       | 0,40 |
| <i>PRM3</i>         | 0,40 |
| <i>OR4K2</i>        | 0,40 |
| <i>TMEM89</i>       | 0,40 |
| <i>CREM</i>         | 0,40 |
| <i>KRT8P41</i>      | 0,40 |
| <i>RTP3</i>         | 0,40 |
| <i>LRRC26</i>       | 0,40 |
| <i>GOLGA8I</i>      | 0,40 |
| <i>SPATA25</i>      | 0,40 |
| <i>PTPN20A</i>      | 0,40 |
| <i>LOC100287534</i> | 0,40 |
| <i>PTPN20B</i>      | 0,40 |
| <i>KIR2DL4</i>      | 0,40 |
| <i>LOC339524</i>    | 0,40 |
| <i>SOX21</i>        | 0,40 |
| <i>DALRD3</i>       | 0,40 |
| <i>TMEM185B</i>     | 0,40 |
| <i>CCL18</i>        | 0,40 |
| <i>NUBP2</i>        | 0,40 |
| <i>CHKB</i>         | 0,39 |
| <i>SPATA8</i>       | 0,39 |
| <i>PIP5K1P1</i>     | 0,39 |
| <i>GLTPD2</i>       | 0,39 |
| <i>INSM1</i>        | 0,39 |
| <i>FAM90A25P</i>    | 0,39 |
| <i>RRAS</i>         | 0,39 |
| <i>SULT1A1</i>      | 0,39 |

|                     |      |
|---------------------|------|
| <i>CCDC41-AS1</i>   | 0,39 |
| <i>GAMT</i>         | 0,39 |
| <i>LOC100507387</i> | 0,39 |
| <i>SIX6</i>         | 0,39 |
| <i>PRKXP1</i>       | 0,39 |
| <i>CHMP4A</i>       | 0,39 |
| <i>DEFB121</i>      | 0,39 |
| <i>OR2AE1</i>       | 0,39 |
| <i>CRYGS</i>        | 0,39 |
| <i>NFE2</i>         | 0,39 |
| <i>RAB40AL</i>      | 0,39 |
| <i>FOXD4L1</i>      | 0,39 |
| <i>LCE2C</i>        | 0,39 |
| <i>LOC389332</i>    | 0,39 |
| <i>IFIT3</i>        | 0,39 |
| <i>PTRHD1</i>       | 0,39 |
| <i>OR6B2</i>        | 0,39 |
| <i>RPLP2</i>        | 0,38 |
| <i>CLDN5</i>        | 0,38 |
| <i>MPDU1</i>        | 0,38 |
| <i>ID2</i>          | 0,38 |
| <i>CHAD</i>         | 0,38 |
| <i>ACR</i>          | 0,38 |
| <i>PABPC4L</i>      | 0,38 |
| <i>DSCAM-AS1</i>    | 0,38 |
| <i>DSCAM-AS1</i>    | 0,38 |
| <i>TNP2</i>         | 0,38 |
| <i>PI16</i>         | 0,38 |
| <i>GCNT4</i>        | 0,38 |
| <i>YY2</i>          | 0,38 |
| <i>SOX14</i>        | 0,38 |
| <i>LOC401242</i>    | 0,38 |
| <i>OR4D9</i>        | 0,38 |
| <i>MEA1</i>         | 0,38 |
| <i>GATM-AS1</i>     | 0,38 |
| <i>OR52D1</i>       | 0,38 |
| <i>KRTAP5-6</i>     | 0,38 |
| <i>APEX1</i>        | 0,38 |
| <i>PCDHB17</i>      | 0,37 |
| <i>MIR126</i>       | 0,37 |
| <i>ZNF581</i>       | 0,37 |
| <i>PRDX5</i>        | 0,37 |
| <i>RPS21</i>        | 0,37 |
| <i>PITPNA-AS1</i>   | 0,37 |
| <i>CORT</i>         | 0,37 |
| <i>HOXD12</i>       | 0,37 |

|                     |      |
|---------------------|------|
| <i>C9orf131</i>     | 0,37 |
| <i>MSTO1</i>        | 0,37 |
| <i>FANCD2OS</i>     | 0,37 |
| <i>C9orf172</i>     | 0,37 |
| <i>FNDC8</i>        | 0,37 |
| <i>LINC00515</i>    | 0,37 |
| <i>SNRPD2P2</i>     | 0,37 |
| <i>LOC100996255</i> | 0,37 |
| <i>GAGE2A</i>       | 0,37 |
| <i>PCDHGA8</i>      | 0,37 |
| <i>KBTD7</i>        | 0,37 |
| <i>C4orf48</i>      | 0,37 |
| <i>MAGEB5</i>       | 0,37 |
| <i>GALNT4</i>       | 0,37 |
| <i>ZP1</i>          | 0,37 |
| <i>WBP1</i>         | 0,37 |
| <i>CST6</i>         | 0,37 |
| <i>LAMA4</i>        | 0,37 |
| <i>ACY3</i>         | 0,37 |
| <i>APOC4</i>        | 0,37 |
| <i>LOC100128361</i> | 0,37 |
| <i>RAB6C</i>        | 0,36 |
| <i>EIF1AD</i>       | 0,36 |
| <i>RHOXF2B</i>      | 0,36 |
| <i>RHOXF2</i>       | 0,36 |
| <i>SNORD116-19</i>  | 0,36 |
| <i>MIR1306</i>      | 0,36 |
| <i>MIR4779</i>      | 0,36 |
| <i>MIR199B</i>      | 0,36 |
| <i>GOLGA6B</i>      | 0,36 |
| <i>OR8H2</i>        | 0,36 |
| <i>MIR4727</i>      | 0,36 |
| <i>MIR3940</i>      | 0,36 |
| <i>MIRLET7G</i>     | 0,36 |
| <i>MIR4666A</i>     | 0,36 |
| <i>MIR583</i>       | 0,36 |
| <i>IFNA10</i>       | 0,36 |
| <i>IFNL2</i>        | 0,36 |
| <i>LOC613037</i>    | 0,36 |
| <i>LOC100130348</i> | 0,36 |
| <i>MIR130A</i>      | 0,36 |
| <i>MIR1276</i>      | 0,36 |
| <i>LOC100505978</i> | 0,36 |
| <i>GPR84</i>        | 0,36 |
| <i>MIR548J</i>      | 0,36 |
| <i>MIR3130-2</i>    | 0,36 |

|                    |      |
|--------------------|------|
| <i>MIR935</i>      | 0,36 |
| <i>C1orf229</i>    | 0,36 |
| <i>SNORD17</i>     | 0,36 |
| <i>PRAF2</i>       | 0,36 |
| <i>ZNHIT2</i>      | 0,36 |
| <i>SNORA5C</i>     | 0,36 |
| <i>C9orf131</i>    | 0,36 |
| <i>ANKRD63</i>     | 0,36 |
| <i>PRR9</i>        | 0,36 |
| <i>MIR4297</i>     | 0,36 |
| <i>SNORD81</i>     | 0,36 |
| <i>SNORA74A</i>    | 0,36 |
| <i>SNORD116-8</i>  | 0,36 |
| <i>SNORD116-29</i> | 0,36 |
| <i>MIR3150B</i>    | 0,36 |
| <i>KRTAP17-1</i>   | 0,36 |
| <i>ATP5EP2</i>     | 0,36 |
| <i>OR13C3</i>      | 0,36 |
| <i>ISG15</i>       | 0,35 |
| <i>PRM2</i>        | 0,35 |
| <i>TSTD1</i>       | 0,35 |
| <i>SRSF1</i>       | 0,35 |
| <i>MAS1L</i>       | 0,35 |
| <i>KCNA10</i>      | 0,35 |
| <i>DPY19L2P3</i>   | 0,35 |
| <i>MRGPRD</i>      | 0,35 |
| <i>NXNL1</i>       | 0,35 |
| <i>LOC149086</i>   | 0,35 |
| <i>TPP1</i>        | 0,35 |
| <i>OTOR</i>        | 0,35 |
| <i>CDK16</i>       | 0,35 |
| <i>LOC541473</i>   | 0,35 |
| <i>SCGB1C1</i>     | 0,35 |
| <i>IFNK</i>        | 0,35 |
| <i>LOC143666</i>   | 0,35 |
| <i>OR2A25</i>      | 0,35 |
| <i>BLOC1S1</i>     | 0,34 |
| <i>CCL3</i>        | 0,34 |
| <i>PCDHB9</i>      | 0,34 |
| <i>MMP9</i>        | 0,34 |
| <i>MSTO2P</i>      | 0,34 |
| <i>TMEM14E</i>     | 0,34 |
| <i>FAM122A</i>     | 0,34 |
| <i>MIR431</i>      | 0,34 |
| <i>ULBP3</i>       | 0,34 |
| <i>HTATSF1P2</i>   | 0,34 |

|                    |      |
|--------------------|------|
| <i>SNORD114-24</i> | 0,34 |
| <i>GPX4</i>        | 0,34 |
| <i>NAP1L6</i>      | 0,34 |
| <i>PPP3R2</i>      | 0,34 |
| <i>HOXA6</i>       | 0,34 |
| <i>PNRC1</i>       | 0,34 |
| <i>TTC9B</i>       | 0,34 |
| <i>HIST2H2BA</i>   | 0,34 |
| <i>LINC00889</i>   | 0,34 |
| <i>MRPS12</i>      | 0,34 |
| <i>ATP6V1G2</i>    | 0,34 |
| <i>UBQLN3</i>      | 0,34 |
| <i>MRPL34</i>      | 0,34 |
| <i>PTH2</i>        | 0,34 |
| <i>GPX4</i>        | 0,34 |
| <i>ISM1-AS1</i>    | 0,34 |
| <i>TMEM88B</i>     | 0,34 |
| <i>OR1K1</i>       | 0,34 |
| <i>ICAM4</i>       | 0,33 |
| <i>LOC339524</i>   | 0,33 |
| <i>GABARAPL3</i>   | 0,33 |
| <i>SLC39A7</i>     | 0,33 |
| <i>WHAMMP1</i>     | 0,33 |
| <i>FABP1</i>       | 0,33 |
| <i>LINC00634</i>   | 0,33 |
| <i>PNN</i>         | 0,33 |
| <i>SLX1B</i>       | 0,33 |
| <i>OR2AG2</i>      | 0,33 |
| <i>DANCR</i>       | 0,33 |
| <i>KCNA2</i>       | 0,33 |
| <i>HIST1H2BL</i>   | 0,32 |
| <i>MIR133A2</i>    | 0,32 |
| <i>MIRLET7F1</i>   | 0,32 |
| <i>TAS2R14</i>     | 0,32 |
| <i>MIR34C</i>      | 0,32 |
| <i>MIR4296</i>     | 0,32 |
| <i>MIR193A</i>     | 0,32 |
| <i>C2CD4A</i>      | 0,32 |
| <i>YAF2</i>        | 0,32 |
| <i>FOXH1</i>       | 0,32 |
| <i>CYB561D2</i>    | 0,32 |
| <i>NACAP1</i>      | 0,32 |
| <i>C12orf68</i>    | 0,32 |
| <i>OR52K1</i>      | 0,32 |
| <i>KRTAP12-2</i>   | 0,32 |
| <i>LOC641367</i>   | 0,32 |

|                      |      |
|----------------------|------|
| <i>MIR411</i>        | 0,32 |
| <i>ANXA8L1</i>       | 0,32 |
| <i>ANXA8L2</i>       | 0,32 |
| <i>TRMT10C</i>       | 0,31 |
| <i>GP1BA</i>         | 0,31 |
| <i>SNORD114-23</i>   | 0,31 |
| <i>GPR119</i>        | 0,31 |
| <i>GAS6-AS2</i>      | 0,31 |
| <i>MIR31</i>         | 0,31 |
| <i>FAM90A7P</i>      | 0,31 |
| <i>LOC100287846</i>  | 0,31 |
| <i>C16orf86</i>      | 0,31 |
| <i>MIR548U</i>       | 0,31 |
| <i>MIR7-2</i>        | 0,31 |
| <i>PRAC1</i>         | 0,31 |
| <i>YPEL4</i>         | 0,31 |
| <i>LILRA6</i>        | 0,31 |
| <i>CCL21</i>         | 0,31 |
| <i>LOC440117</i>     | 0,31 |
| <i>C9orf142</i>      | 0,30 |
| <i>OR10H2</i>        | 0,30 |
| <i>SPATA33</i>       | 0,30 |
| <i>MIR3126</i>       | 0,30 |
| <i>LOC286297</i>     | 0,30 |
| <i>DKFZp779M0652</i> | 0,30 |
| <i>LOC100270746</i>  | 0,30 |
| <i>STH</i>           | 0,30 |
| <i>MDK</i>           | 0,30 |
| <i>MDK</i>           | 0,30 |
| <i>MDK</i>           | 0,30 |
| <i>MDK</i>           | 0,30 |
| <i>MDK</i>           | 0,30 |
| <i>OR4A15</i>        | 0,30 |
| <i>ANXA2R</i>        | 0,30 |
| <i>PPP1R3E</i>       | 0,30 |
| <i>ENSA</i>          | 0,30 |
| <i>SNORD105</i>      | 0,29 |
| <i>OR56B1</i>        | 0,29 |
| <i>MAN1B1-AS1</i>    | 0,29 |
| <i>SNORA27</i>       | 0,29 |
| <i>FDX1L</i>         | 0,29 |
| <i>ANKRD36BP1</i>    | 0,29 |
| <i>MRPS12</i>        | 0,29 |
| <i>LOC728752</i>     | 0,29 |
| <i>LOC653653</i>     | 0,29 |
| <i>MIR3141</i>       | 0,29 |
| <i>S100A6</i>        | 0,29 |



|                     |      |
|---------------------|------|
| <i>RXFP4</i>        | 0,29 |
| <i>ARL14</i>        | 0,29 |
| <i>LOC101059948</i> | 0,28 |
| <i>OR5P2</i>        | 0,28 |
| <i>SNHG5</i>        | 0,28 |
| <i>TPRKB</i>        | 0,28 |
| <i>REP15</i>        | 0,28 |
| <i>LOC100505812</i> | 0,28 |
| <i>PCDHGA3</i>      | 0,28 |
| <i>BIN3-IT1</i>     | 0,28 |
| <i>GJB5</i>         | 0,28 |
| <i>FAM195B</i>      | 0,28 |
| <i>OR2G2</i>        | 0,28 |
| <i>NGFRAP1</i>      | 0,27 |
| <i>THAP11</i>       | 0,27 |
| <i>SNORD116-23</i>  | 0,27 |
| <i>MIR495</i>       | 0,27 |
| <i>MIR5088</i>      | 0,27 |
| <i>MIR1234</i>      | 0,27 |
| <i>TOPORS-AS1</i>   | 0,27 |
| <i>SNORD16</i>      | 0,27 |
| <i>MIR4790</i>      | 0,27 |
| <i>ZNRF2P2</i>      | 0,27 |
| <i>H2BFXP</i>       | 0,27 |
| <i>MIR3165</i>      | 0,27 |
| <i>SLC35G6</i>      | 0,27 |
| <i>EIF3IP1</i>      | 0,27 |
| <i>LCE1C</i>        | 0,27 |
| <i>HLA-DQA1</i>     | 0,27 |
| <i>MIR661</i>       | 0,27 |
| <i>SNORD114-31</i>  | 0,27 |
| <i>SNORA8</i>       | 0,27 |
| <i>MIR662</i>       | 0,27 |
| <i>LY6G5B</i>       | 0,27 |
| <i>ANP32C</i>       | 0,27 |
| <i>MIR195</i>       | 0,27 |
| <i>HOXC12</i>       | 0,27 |
| <i>SAP25</i>        | 0,27 |
| <i>OR5D16</i>       | 0,26 |
| <i>HSPA1B</i>       | 0,26 |
| <i>TRIM51HP</i>     | 0,26 |
| <i>GATSL1</i>       | 0,26 |
| <i>GATSL2</i>       | 0,26 |
| <i>OR7E14P</i>      | 0,26 |
| <i>TEX21P</i>       | 0,26 |
| <i>SNORD114-21</i>  | 0,26 |

|                     |      |
|---------------------|------|
| <i>OR2B11</i>       | 0,26 |
| <i>GOLGA6D</i>      | 0,26 |
| <i>MIR3976</i>      | 0,26 |
| <i>LIPT2</i>        | 0,26 |
| <i>TOP1P1</i>       | 0,26 |
| <i>IFNL1</i>        | 0,26 |
| <i>OR6Y1</i>        | 0,26 |
| <i>UPK3BL</i>       | 0,25 |
| <i>TAS2R30</i>      | 0,25 |
| <i>OR4N2</i>        | 0,25 |
| <i>FAU</i>          | 0,25 |
| <i>LCE5A</i>        | 0,25 |
| <i>NUTM2A</i>       | 0,25 |
| <i>SBDS</i>         | 0,25 |
| <i>ZNF524</i>       | 0,25 |
| <i>SNORD116-2</i>   | 0,25 |
| <i>BARX1</i>        | 0,25 |
| <i>CNFN</i>         | 0,25 |
| <i>IFNA16</i>       | 0,25 |
| <i>LOC390660</i>    | 0,25 |
| <i>OR8H1</i>        | 0,25 |
| <i>OR9A2</i>        | 0,25 |
| <i>OR14A16</i>      | 0,25 |
| <i>FAM106CP</i>     | 0,25 |
| <i>SLC25A2</i>      | 0,25 |
| <i>LOC392196</i>    | 0,25 |
| <i>DIO3</i>         | 0,25 |
| <i>MANEA-AS1</i>    | 0,25 |
| <i>LOC440925</i>    | 0,24 |
| <i>NGFRAP1</i>      | 0,24 |
| <i>LOC101241902</i> | 0,24 |
| <i>NPB</i>          | 0,24 |
| <i>KRTAP20-1</i>    | 0,24 |
| <i>SNORA31</i>      | 0,24 |
| <i>LOC100272217</i> | 0,24 |
| <i>ATF4</i>         | 0,24 |
| <i>C11orf86</i>     | 0,24 |
| <i>SNORD87</i>      | 0,24 |
| <i>CST1</i>         | 0,24 |
| <i>DEFB133</i>      | 0,24 |
| <i>OR10J1</i>       | 0,24 |
| <i>FTO-IT1</i>      | 0,24 |
| <i>OR1J2</i>        | 0,23 |
| <i>LOC729020</i>    | 0,23 |
| <i>MIR4684</i>      | 0,23 |
| <i>CDK5R2</i>       | 0,23 |

|                     |      |
|---------------------|------|
| <i>DCAF8L2</i>      | 0,23 |
| <i>CCL24</i>        | 0,23 |
| <i>TMEM167B</i>     | 0,23 |
| <i>MARK2P9</i>      | 0,23 |
| <i>ZFP62</i>        | 0,23 |
| <i>OR10G3</i>       | 0,23 |
| <i>FRMD8P1</i>      | 0,23 |
| <i>EDDM3A</i>       | 0,23 |
| <i>COMMD4</i>       | 0,22 |
| <i>MT2A</i>         | 0,22 |
| <i>PTPN20A</i>      | 0,22 |
| <i>LOC100288748</i> | 0,22 |
| <i>SNORD6</i>       | 0,22 |
| <i>MIR558</i>       | 0,22 |
| <i>TMSB10</i>       | 0,22 |
| <i>SNORD114-9</i>   | 0,22 |
| <i>SNORD19</i>      | 0,22 |
| <i>MIR4265</i>      | 0,22 |
| <i>MIR27B</i>       | 0,22 |
| <i>LOC100132356</i> | 0,22 |
| <i>SCARNA9L</i>     | 0,22 |
| <i>OR2M5</i>        | 0,22 |
| <i>SNORA34</i>      | 0,22 |
| <i>TXNDC2</i>       | 0,22 |
| <i>MIR19B1</i>      | 0,22 |
| <i>HELT</i>         | 0,21 |
| <i>PRR22</i>        | 0,21 |
| <i>CLEC3A</i>       | 0,21 |
| <i>GTSF1L</i>       | 0,20 |
| <i>SLC25A21-AS1</i> | 0,20 |
| <i>IFITM1</i>       | 0,20 |
| <i>SNORD116-13</i>  | 0,20 |
| <i>IFNA21</i>       | 0,20 |
| <i>SNORD1A</i>      | 0,20 |
| <i>HTR1B</i>        | 0,20 |
| <i>PFDN6</i>        | 0,20 |
| <i>PFDN6</i>        | 0,20 |
| <i>MIR1270-1</i>    | 0,20 |
| <i>TCEAL8</i>       | 0,20 |
| <i>D2HGDH</i>       | 0,20 |
| <i>C12orf57</i>     | 0,19 |
| <i>C5AR2</i>        | 0,19 |
| <i>CLEC18C</i>      | 0,19 |
| <i>DBIL5P</i>       | 0,19 |
| <i>OR10A3</i>       | 0,19 |
| <i>HCFC1R1</i>      | 0,19 |

|                     |      |
|---------------------|------|
| <i>TDRG1</i>        | 0,19 |
| <i>OR5B2</i>        | 0,18 |
| <i>LILRB4</i>       | 0,18 |
| <i>MIR1305</i>      | 0,18 |
| <i>MIR5187</i>      | 0,18 |
| <i>MIR5190</i>      | 0,18 |
| <i>SNORA33</i>      | 0,18 |
| <i>SCARNA1</i>      | 0,18 |
| <i>OR4C11</i>       | 0,18 |
| <i>SNORD35B</i>     | 0,18 |
| <i>LCE3D</i>        | 0,18 |
| <i>RPS27</i>        | 0,18 |
| <i>SNORD97</i>      | 0,18 |
| <i>SNORA70B</i>     | 0,18 |
| <i>SIGMAR1</i>      | 0,18 |
| <i>GPR31</i>        | 0,17 |
| <i>OVCA2</i>        | 0,17 |
| <i>SOX4</i>         | 0,17 |
| <i>KRTAP10-6</i>    | 0,17 |
| <i>HBB</i>          | 0,17 |
| <i>UCN</i>          | 0,17 |
| <i>OR51F1</i>       | 0,17 |
| <i>PPCS</i>         | 0,17 |
| <i>ACTL7B</i>       | 0,17 |
| <i>LOC84931</i>     | 0,17 |
| <i>MIR1247</i>      | 0,17 |
| <i>HS6ST2-AS1</i>   | 0,17 |
| <i>OR8D1</i>        | 0,17 |
| <i>FOXD4</i>        | 0,17 |
| <i>MIR181B1</i>     | 0,17 |
| <i>LOC100506314</i> | 0,16 |
| <i>SCNM1</i>        | 0,16 |
| <i>TUBB4B</i>       | 0,16 |
| <i>MAGEF1</i>       | 0,16 |
| <i>OR5T3</i>        | 0,16 |
| <i>EGOT</i>         | 0,16 |
| <i>OR1C1</i>        | 0,15 |
| <i>OR1S2</i>        | 0,15 |
| <i>SPEM1</i>        | 0,15 |
| <i>OR2B3</i>        | 0,15 |
| <i>LOC100130075</i> | 0,15 |
| <i>SNORA17</i>      | 0,15 |
| <i>GAGE2A</i>       | 0,15 |
| <i>GAGE2C</i>       | 0,15 |
| <i>GAGE2E</i>       | 0,15 |
| <i>GAGE8</i>        | 0,15 |

|                     |      |
|---------------------|------|
| <i>ARMCX6</i>       | 0,14 |
| <i>OR8K3</i>        | 0,14 |
| <i>GADD45G</i>      | 0,14 |
| <i>GJB1</i>         | 0,14 |
| <i>POU3F1</i>       | 0,14 |
| <i>MAGOH2</i>       | 0,14 |
| <i>PHLDA2</i>       | 0,14 |
| <i>MIR138-1</i>     | 0,14 |
| <i>HIST1H2AC</i>    | 0,14 |
| <i>TOPORS-AS1</i>   | 0,14 |
| <i>MIR193B</i>      | 0,14 |
| <i>LOC407835</i>    | 0,13 |
| <i>SNORD89</i>      | 0,13 |
| <i>NRN1L</i>        | 0,13 |
| <i>AHSP</i>         | 0,13 |
| <i>SLC18A3</i>      | 0,13 |
| <i>MIR339</i>       | 0,13 |
| <i>FAM178A</i>      | 0,13 |
| <i>OR5AK4P</i>      | 0,13 |
| <i>MIR4460</i>      | 0,13 |
| <i>TMEM133</i>      | 0,12 |
| <i>MIR21</i>        | 0,12 |
| <i>MIR4724</i>      | 0,12 |
| <i>FAM127C</i>      | 0,12 |
| <i>MIR4757</i>      | 0,12 |
| <i>SNORD94</i>      | 0,12 |
| <i>OR7E24</i>       | 0,12 |
| <i>DRAP1</i>        | 0,12 |
| <i>SNORD32A</i>     | 0,12 |
| <i>UPK2</i>         | 0,12 |
| <i>LTB4R2</i>       | 0,11 |
| <i>OR2AP1</i>       | 0,11 |
| <i>MIR5687</i>      | 0,11 |
| <i>MIR190B</i>      | 0,11 |
| <i>CCNO</i>         | 0,11 |
| <i>FAM71C</i>       | 0,11 |
| <i>MGC45922</i>     | 0,10 |
| <i>NBPF6</i>        | 0,10 |
| <i>C9orf135-AS1</i> | 0,10 |
| <i>MIR367</i>       | 0,10 |
| <i>MT1HL1</i>       | 0,10 |
| <i>HIST2H2AC</i>    | 0,10 |
| <i>SSTR5</i>        | 0,09 |
| <i>C17orf100</i>    | 0,09 |
| <i>MIR1291</i>      | 0,09 |
| <i>LOC284023</i>    | 0,09 |

|                    |      |
|--------------------|------|
| <i>OR7G2</i>       | 0,09 |
| <i>RPPH1</i>       | 0,08 |
| <i>OR51I1</i>      | 0,08 |
| <i>PCDHGB4</i>     | 0,08 |
| <i>MT1M</i>        | 0,07 |
| <i>OR8K1</i>       | 0,07 |
| <i>MIR218-2</i>    | 0,07 |
| <i>HAND1</i>       | 0,06 |
| <i>COX6A2</i>      | 0,06 |
| <i>HIST1H4L</i>    | 0,06 |
| <i>MIR302D</i>     | 0,05 |
| <i>PRLH</i>        | 0,05 |
| <i>OR4S2</i>       | 0,05 |
| <i>LINC00895</i>   | 0,05 |
| <i>OR51B6</i>      | 0,04 |
| <i>OXT</i>         | 0,04 |
| <i>OR52W1</i>      | 0,04 |
| <i>OR4C6</i>       | 0,03 |
| <i>SNORA39</i>     | 0,03 |
| <i>RPS26</i>       | 0,02 |
| <i>MIR4633</i>     | 0,00 |
| <i>MIR599</i>      | 0,00 |
| <i>MIR323A</i>     | 0,00 |
| <i>MIR330</i>      | 0,00 |
| <i>MIR1200</i>     | 0,00 |
| <i>MIR4540</i>     | 0,00 |
| <i>MIR4642</i>     | 0,00 |
| <i>MIR3909</i>     | 0,00 |
| <i>MIR5047</i>     | 0,00 |
| <i>MIR624</i>      | 0,00 |
| <i>SNORD56B</i>    | 0,00 |
| <i>MIRLET7E</i>    | 0,00 |
| <i>MIR4758</i>     | 0,00 |
| <i>MIR3679</i>     | 0,00 |
| <i>SCARNA8</i>     | 0,00 |
| <i>MIR181D</i>     | 0,00 |
| <i>MIR337</i>      | 0,00 |
| <i>MIR5700</i>     | 0,00 |
| <i>MIR563</i>      | 0,00 |
| <i>MIR3186</i>     | 0,00 |
| <i>SNORD88A</i>    | 0,00 |
| <i>MIR20B</i>      | 0,00 |
| <i>MIR548G</i>     | 0,00 |
| <i>SNORD115-20</i> | 0,00 |
| <i>SNORD112</i>    | 0,00 |
| <i>MIR4526</i>     | 0,00 |

|                    |      |
|--------------------|------|
| <i>RNU86</i>       | 0,00 |
| <i>MIR4640</i>     | 0,00 |
| <i>MIR4799</i>     | 0,00 |
| <i>MIR3714</i>     | 0,00 |
| <i>SNORD53</i>     | 0,00 |
| <i>SNORD62B</i>    | 0,00 |
| <i>MIR30B</i>      | 0,00 |
| <i>MIR4736</i>     | 0,00 |
| <i>MIR5699</i>     | 0,00 |
| <i>MIR1197</i>     | 0,00 |
| <i>SNORA3</i>      | 0,00 |
| <i>MIR4682</i>     | 0,00 |
| <i>MIR632</i>      | 0,00 |
| <i>MIR152</i>      | 0,00 |
| <i>SNORD107</i>    | 0,00 |
| <i>SNORD116-5</i>  | 0,00 |
| <i>MIR382</i>      | 0,00 |
| <i>SNORD37</i>     | 0,00 |
| <i>MIR3198-1</i>   | 0,00 |
| <i>MIR4761</i>     | 0,00 |
| <i>MIR4429</i>     | 0,00 |
| <i>MIR4251</i>     | 0,00 |
| <i>MIR101-2</i>    | 0,00 |
| <i>MIR181A2</i>    | 0,00 |
| <i>MIR4673</i>     | 0,00 |
| <i>MIR875</i>      | 0,00 |
| <i>MIR199A2</i>    | 0,00 |
| <i>MIR4731</i>     | 0,00 |
| <i>MIR4718</i>     | 0,00 |
| <i>SCARNA27</i>    | 0,00 |
| <i>MIR3148</i>     | 0,00 |
| <i>MIR3924</i>     | 0,00 |
| <i>MIR335</i>      | 0,00 |
| <i>MIR4644</i>     | 0,00 |
| <i>SNORA36A</i>    | 0,00 |
| <i>MIR890</i>      | 0,00 |
| <i>MIR4704</i>     | 0,00 |
| <i>SNORA70G</i>    | 0,00 |
| <i>MIR4486</i>     | 0,00 |
| <i>SNORD18B</i>    | 0,00 |
| <i>MIR127</i>      | 0,00 |
| <i>SNORD114-19</i> | 0,00 |
| <i>MIR376A2</i>    | 0,00 |
| <i>MIR487A</i>     | 0,00 |
| <i>MIR134</i>      | 0,00 |
| <i>MIR323B</i>     | 0,00 |

|             |      |
|-------------|------|
| MIR4530     | 0,00 |
| MIR4751     | 0,00 |
| MIR1323     | 0,00 |
| MIR5011     | 0,00 |
| MIR3196     | 0,00 |
| MIR5690     | 0,00 |
| MIR449C     | 0,00 |
| MIR3938     | 0,00 |
| MIR548F2    | 0,00 |
| MIR548AR    | 0,00 |
| MIR551A     | 0,00 |
| MIR3122     | 0,00 |
| MIR455      | 0,00 |
| MIR147A     | 0,00 |
| MIR490      | 0,00 |
| MIR621      | 0,00 |
| MIR4688     | 0,00 |
| MIR4691     | 0,00 |
| MIR3167     | 0,00 |
| MIR4518     | 0,00 |
| SNORD116-11 | 0,00 |
| SNORD116-25 | 0,00 |
| SNORD115-32 | 0,00 |
| MIR4716     | 0,00 |
| MIR1238     | 0,00 |
| SNORD123    | 0,00 |
| MIR3142     | 0,00 |
| MIR135A1    | 0,00 |
| MIR5000     | 0,00 |
| MIR219-2    | 0,00 |
| MIR2964A    | 0,00 |
| KRTAP6-2    | 0,00 |
| MIR644B     | 0,00 |
| MIR3128     | 0,00 |
| SNORD77     | 0,00 |
| SNORD54     | 0,00 |
| MIR1203     | 0,00 |
| SNORD116-28 | 0,00 |
| MIR549      | 0,00 |
| MIR130B     | 0,00 |
| MIR3199-1   | 0,00 |
| MIR3199-2   | 0,00 |
| MIR145      | 0,00 |
| SNORD11B    | 0,00 |
| MIR3119-2   | 0,00 |
| MIR5194     | 0,00 |



|                    |      |
|--------------------|------|
| <i>SCARNA11</i>    | 0,00 |
| <i>HSPB9</i>       | 0,00 |
| <i>CYCSP52</i>     | 0,00 |
| <i>UBE2DNL</i>     | 0,00 |
| <i>OR10AG1</i>     | 0,00 |
| <i>OR10S1</i>      | 0,00 |
| <i>MIR362</i>      | 0,00 |
| <i>MIR1468</i>     | 0,00 |
| <i>MIR223</i>      | 0,00 |
| <i>MIR374A</i>     | 0,00 |
| <i>MIR19B2</i>     | 0,00 |
| <i>MIR4299</i>     | 0,00 |
| <i>MIR129-2</i>    | 0,00 |
| <i>MIR4493</i>     | 0,00 |
| <i>MIR1265</i>     | 0,00 |
| <i>MIR1253</i>     | 0,00 |
| <i>MIR4723</i>     | 0,00 |
| <i>MIR451A</i>     | 0,00 |
| <i>MIR451B</i>     | 0,00 |
| <i>MIR548AA2</i>   | 0,00 |
| <i>SCARNA16</i>    | 0,00 |
| <i>MIR1538</i>     | 0,00 |
| <i>SNORD115-10</i> | 0,00 |
| <i>SNORD115-19</i> | 0,00 |
| <i>MIR211</i>      | 0,00 |
| <i>MIR2116</i>     | 0,00 |
| <i>MIR433</i>      | 0,00 |
| <i>SNORD113-4</i>  | 0,00 |
| <i>SNORD114-13</i> | 0,00 |
| <i>MIR3188</i>     | 0,00 |
| <i>MIR4324</i>     | 0,00 |
| <i>MIR519D</i>     | 0,00 |
| <i>MIR526A2</i>    | 0,00 |
| <i>MIR1283-2</i>   | 0,00 |
| <i>MIR373</i>      | 0,00 |
| <i>MIRLET7B</i>    | 0,00 |
| <i>MIR1292</i>     | 0,00 |
| <i>MIR646</i>      | 0,00 |
| <i>MIR155</i>      | 0,00 |
| <i>KRTAP19-7</i>   | 0,00 |
| <i>MIR3146</i>     | 0,00 |
| <i>MIR4657</i>     | 0,00 |
| <i>MIR4284</i>     | 0,00 |
| <i>MIR3666</i>     | 0,00 |
| <i>MIR29A</i>      | 0,00 |
| <i>MIR548AR</i>    | 0,00 |

|                   |      |
|-------------------|------|
| <i>MIR4647</i>    | 0,00 |
| <i>MIR3668</i>    | 0,00 |
| <i>MIR4456</i>    | 0,00 |
| <i>MIR4457</i>    | 0,00 |
| <i>MIR4636</i>    | 0,00 |
| <i>MIR5197</i>    | 0,00 |
| <i>MIR3912</i>    | 0,00 |
| <i>MIR4800</i>    | 0,00 |
| <i>MIR302B</i>    | 0,00 |
| <i>MIR1243</i>    | 0,00 |
| <i>MIR4788</i>    | 0,00 |
| <i>SNORD2</i>     | 0,00 |
| <i>MIR3127</i>    | 0,00 |
| <i>MIR4771-2</i>  | 0,00 |
| <i>MIR4268</i>    | 0,00 |
| <i>MIR4632</i>    | 0,00 |
| <i>MIR3675</i>    | 0,00 |
| <i>MIR3115</i>    | 0,00 |
| <i>SNORD21</i>    | 0,00 |
| <i>MIR760</i>     | 0,00 |
| <i>MIR4654</i>    | 0,00 |
| <i>SNORD76</i>    | 0,00 |
| <i>MIR4476</i>    | 0,00 |
| <i>MIR486</i>     | 0,00 |
| <i>MIR1205</i>    | 0,00 |
| <i>MIR937</i>     | 0,00 |
| <i>KRTAP19-3</i>  | 0,00 |
| <i>TYRO3P</i>     | 0,00 |
| <i>KRTAP4-1</i>   | 0,00 |
| <i>DPPA2P3</i>    | 0,00 |
| <i>PPP1R2P9</i>   | 0,00 |
| <i>OR8J3</i>      | 0,00 |
| <i>SNORD15A</i>   | 0,00 |
| <i>SNORA10</i>    | 0,00 |
| <i>SNORA75</i>    | 0,00 |
| <i>SNORA16A</i>   | 0,00 |
| <i>CLDN25</i>     | 0,00 |
| <i>MIR450A1</i>   | 0,00 |
| <i>MIR17</i>      | 0,00 |
| <i>OR1D5</i>      | 0,00 |
| <i>SNORD116-1</i> | 0,00 |
| <i>SNORD115-3</i> | 0,00 |
| <i>MIR1282</i>    | 0,00 |
| <i>MIR3936</i>    | 0,00 |
| <i>MIR5702</i>    | 0,00 |
| <i>MIR5191</i>    | 0,00 |

|                   |      |
|-------------------|------|
| <i>MIR1231</i>    | 0,00 |
| <i>LINC01003</i>  | 0,00 |
| <i>OR52E6</i>     | 0,00 |
| <i>SNORA53</i>    | 0,00 |
| <i>OR5E1P</i>     | 0,00 |
| <i>RNASE1</i>     | 0,00 |
| <i>MIR4686</i>    | 0,00 |
| <i>MIR4480</i>    | 0,00 |
| <i>MIR4521</i>    | 0,00 |
| <i>SNORA38B</i>   | 0,00 |
| <i>MIR3529</i>    | 0,00 |
| <i>MIR208B</i>    | 0,00 |
| <i>SNORA79</i>    | 0,00 |
| <i>MIR1275</i>    | 0,00 |
| <i>SNORA44</i>    | 0,00 |
| <i>SNORD78</i>    | 0,00 |
| <i>SNORD44</i>    | 0,00 |
| <i>SNORD75</i>    | 0,00 |
| <i>MIR4670</i>    | 0,00 |
| <i>OR4D5</i>      | 0,00 |
| <i>HIST1H4E</i>   | 0,00 |
| <i>MIR651</i>     | 0,00 |
| <i>MIR4305</i>    | 0,00 |
| <i>MIR15A</i>     | 0,00 |
| <i>MIR331</i>     | 0,00 |
| <i>MIR548K</i>    | 0,00 |
| <i>SNORD91B</i>   | 0,00 |
| <i>SNORD116-2</i> | 0,00 |
| <i>SNORD115-2</i> | 0,00 |
| <i>MIR518E</i>    | 0,00 |
| <i>SNORD58C</i>   | 0,00 |
| <i>MIR122</i>     | 0,00 |
| <i>MIR578</i>     | 0,00 |
| <i>MIR5192</i>    | 0,00 |
| <i>MIR200A</i>    | 0,00 |
| <i>MIR554</i>     | 0,00 |
| <i>MIR204</i>     | 0,00 |
| <i>GSTM2P1</i>    | 0,00 |
| <i>LYPD8</i>      | 0,00 |
| <i>SNORA48</i>    | 0,00 |
| <i>SNORA24</i>    | 0,00 |
| <i>SCARNA9</i>    | 0,00 |
| <i>OR52J3</i>     | 0,00 |
| <i>RNASE1</i>     | 0,00 |
| <i>TAS2R7</i>     | 0,00 |
| <i>OR8G2</i>      | 0,00 |

|                    |      |
|--------------------|------|
| <i>HIST1H4B</i>    | 0,00 |
| <i>KRTAP12-3</i>   | 0,00 |
| <i>OR5AU1</i>      | 0,00 |
| <i>SPRR4</i>       | 0,00 |
| <i>CGB1</i>        | 0,00 |
| <i>OR5K1</i>       | 0,00 |
| <i>APOOP5</i>      | 0,00 |
| <i>MIR1911</i>     | 0,00 |
| <i>MIR542</i>      | 0,00 |
| <i>MIR4499</i>     | 0,00 |
| <i>SNORD102</i>    | 0,00 |
| <i>MIR18A</i>      | 0,00 |
| <i>MIR613</i>      | 0,00 |
| <i>MIR615</i>      | 0,00 |
| <i>MIR1252</i>     | 0,00 |
| <i>MIR4700</i>     | 0,00 |
| <i>MIR4491</i>     | 0,00 |
| <i>MIR125B1</i>    | 0,00 |
| <i>MIR5692C2</i>   | 0,00 |
| <i>MIR3184</i>     | 0,00 |
| <i>MIR2909</i>     | 0,00 |
| <i>MIR196A1</i>    | 0,00 |
| <i>SNORA76</i>     | 0,00 |
| <i>MIR3064</i>     | 0,00 |
| <i>MIR4721</i>     | 0,00 |
| <i>MIR4508</i>     | 0,00 |
| <i>SNORD116-12</i> | 0,00 |
| <i>SNORD116-17</i> | 0,00 |
| <i>MIR628</i>      | 0,00 |
| <i>SNORD127</i>    | 0,00 |
| <i>MIR4709</i>     | 0,00 |
| <i>MIR665</i>      | 0,00 |
| <i>SNORD113-8</i>  | 0,00 |
| <i>SNORD114-11</i> | 0,00 |
| <i>MIR543</i>      | 0,00 |
| <i>MIR668</i>      | 0,00 |
| <i>MIR656</i>      | 0,00 |
| <i>MIR4322</i>     | 0,00 |
| <i>SNORD41</i>     | 0,00 |
| <i>MIR181C</i>     | 0,00 |
| <i>MIR639</i>      | 0,00 |
| <i>MIR3189</i>     | 0,00 |
| <i>MIR4531</i>     | 0,00 |
| <i>SNAR-C1</i>     | 0,00 |
| <i>SNAR-C3</i>     | 0,00 |
| <i>MIR518A1</i>    | 0,00 |

|                  |      |
|------------------|------|
| <i>MIR371A</i>   | 0,00 |
| <i>MIR371B</i>   | 0,00 |
| <i>MIR4320</i>   | 0,00 |
| <i>MIR3591</i>   | 0,00 |
| <i>MIR650</i>    | 0,00 |
| <i>SNORA71C</i>  | 0,00 |
| <i>MIR3194</i>   | 0,00 |
| <i>MIR941-1</i>  | 0,00 |
| <i>KRTAP27-1</i> | 0,00 |
| <i>SNORA80</i>   | 0,00 |
| <i>MIR4658</i>   | 0,00 |
| <i>MIR3691</i>   | 0,00 |
| <i>SNORD48</i>   | 0,00 |
| <i>MIR219-1</i>  | 0,00 |
| <i>MIR30A</i>    | 0,00 |
| <i>MIR3939</i>   | 0,00 |
| <i>MIR4280</i>   | 0,00 |
| <i>VTRNA1-3</i>  | 0,00 |
| <i>MIR103A1</i>  | 0,00 |
| <i>MIR103B1</i>  | 0,00 |
| <i>MIR943</i>    | 0,00 |
| <i>MIR4798</i>   | 0,00 |
| <i>MIR4802</i>   | 0,00 |
| <i>MIR1973</i>   | 0,00 |
| <i>SNORD73A</i>  | 0,00 |
| <i>MIR3945</i>   | 0,00 |
| <i>MIR191</i>    | 0,00 |
| <i>MIR4787</i>   | 0,00 |
| <i>MIR3136</i>   | 0,00 |
| <i>OR5H14</i>    | 0,00 |
| <i>MIR568</i>    | 0,00 |
| <i>MIR5704</i>   | 0,00 |
| <i>PISRT1</i>    | 0,00 |
| <i>MIR3919</i>   | 0,00 |
| <i>MIR944</i>    | 0,00 |
| <i>MIR570</i>    | 0,00 |
| <i>MIR4797</i>   | 0,00 |
| <i>MIR4261</i>   | 0,00 |
| <i>MIR4778</i>   | 0,00 |
| <i>MIR4264</i>   | 0,00 |
| <i>MIR378F</i>   | 0,00 |
| <i>MIR4420</i>   | 0,00 |
| <i>MIR5584</i>   | 0,00 |
| <i>MIR3671</i>   | 0,00 |
| <i>MIR5087</i>   | 0,00 |
| <i>MIR4424</i>   | 0,00 |

|                  |      |
|------------------|------|
| <i>MIR4735</i>   | 0,00 |
| <i>MIR664</i>    | 0,00 |
| <i>MIR4742</i>   | 0,00 |
| <i>MIR5008</i>   | 0,00 |
| <i>MIR3620</i>   | 0,00 |
| <i>MIR3153</i>   | 0,00 |
| <i>MIR2278</i>   | 0,00 |
| <i>MIR3689D2</i> | 0,00 |
| <i>MIR5708</i>   | 0,00 |
| <i>MIR3150A</i>  | 0,00 |
| <i>MIR1206</i>   | 0,00 |
| <i>MIR4472-1</i> | 0,00 |
| <i>OR51G2</i>    | 0,00 |
| <i>ACTL7A</i>    | 0,00 |
| <i>OR52A1</i>    | 0,00 |
| <i>OR6Q1</i>     | 0,00 |
| <i>OR4K13</i>    | 0,00 |
| <i>OR2A2</i>     | 0,00 |
| <i>KRTAP13-2</i> | 0,00 |
| <i>OR8J1</i>     | 0,00 |
| <i>HIST1H2BJ</i> | 0,00 |
| <i>IQCF4</i>     | 0,00 |
| <i>KRTAP5-3</i>  | 0,00 |
| <i>OR2Z1</i>     | 0,00 |
| <i>KRTAP9-8</i>  | 0,00 |
| <i>PCNA-AS1</i>  | 0,00 |
| <i>MTRNR2L10</i> | 0,00 |
| <i>OR4F5</i>     | 0,00 |
| <i>TAL2</i>      | 0,00 |
| <i>OR6S1</i>     | 0,00 |
| <i>SNORA45</i>   | 0,00 |
| <i>SNAR-F</i>    | 0,00 |
| <i>SNORA51</i>   | 0,00 |
| <i>SNORA42</i>   | 0,00 |
| <i>SCARNA12</i>  | 0,00 |
| <i>KRTAP4-2</i>  | 0,00 |
| <i>RPS28</i>     | 0,00 |
| <i>KRTAP10-4</i> | 0,00 |
| <i>MIR532</i>    | 0,00 |
| <i>MIR452</i>    | 0,00 |
| <i>MIR105-2</i>  | 0,00 |
| <i>MIR623</i>    | 0,00 |
| <i>MIR1244-1</i> | 0,00 |
| <i>MIR3973</i>   | 0,00 |
| <i>MIR3160-1</i> | 0,00 |
| <i>MIR3160-2</i> | 0,00 |

|                    |      |
|--------------------|------|
| <i>MIR3162</i>     | 0,00 |
| <i>MIR423</i>      | 0,00 |
| <i>MIR3615</i>     | 0,00 |
| <i>SNORD116-22</i> | 0,00 |
| <i>SNORD115-41</i> | 0,00 |
| <i>MIR4515</i>     | 0,00 |
| <i>SNORD8</i>      | 0,00 |
| <i>MIR758</i>      | 0,00 |
| <i>MIR654</i>      | 0,00 |
| <i>MIR7-3</i>      | 0,00 |
| <i>SNAR-D</i>      | 0,00 |
| <i>MIR523</i>      | 0,00 |
| <i>MIR124-3</i>    | 0,00 |
| <i>MIR3943</i>     | 0,00 |
| <i>MIR590</i>      | 0,00 |
| <i>MIR182</i>      | 0,00 |
| <i>MIR671</i>      | 0,00 |
| <i>MIR586</i>      | 0,00 |
| <i>MIR2113</i>     | 0,00 |
| <i>MIR4277</i>     | 0,00 |
| <i>MIR5688</i>     | 0,00 |
| <i>MIR4796</i>     | 0,00 |
| <i>TERC</i>        | 0,00 |
| <i>MIR4432</i>     | 0,00 |
| <i>MIR30E</i>      | 0,00 |
| <i>SNORD45A</i>    | 0,00 |
| <i>MIR488</i>      | 0,00 |
| <i>MIRLET7D</i>    | 0,00 |
| <i>MIR124-1</i>    | 0,00 |
| <i>C11orf96</i>    | 0,00 |
| <i>OR6C4</i>       | 0,00 |
| <i>PYDC2</i>       | 0,00 |
| <i>HIST3H2A</i>    | 0,00 |
| <i>DPPA5</i>       | 0,00 |
| <i>CHKB-AS1</i>    | 0,00 |
| <i>PIN1P1</i>      | 0,00 |
| <i>IFNA4</i>       | 0,00 |
| <i>CGB5</i>        | 0,00 |
| <i>CLDN24</i>      | 0,00 |
| <i>OR4P4</i>       | 0,00 |
| <i>HIST1H3B</i>    | 0,00 |
| <i>KRTAP10-3</i>   | 0,00 |
| <i>MTRNR2L9</i>    | 0,00 |
| <i>CDRT15P2</i>    | 0,00 |
| <i>KRTAP10-12</i>  | 0,00 |
| <i>OR4L1</i>       | 0,00 |

|                    |      |
|--------------------|------|
| <i>HIST1H2AE</i>   | 0,00 |
| <i>ZNF847P</i>     | 0,00 |
| <i>MIR363</i>      | 0,00 |
| <i>MIR503</i>      | 0,00 |
| <i>SNORA57</i>     | 0,00 |
| <i>SNORD31</i>     | 0,00 |
| <i>UBTFL1</i>      | 0,00 |
| <i>MIR4693</i>     | 0,00 |
| <i>OR10G4</i>      | 0,00 |
| <i>SNORD42B</i>    | 0,00 |
| <i>SNORD1C</i>     | 0,00 |
| <i>SNORD115-24</i> | 0,00 |
| <i>SCARNA15</i>    | 0,00 |
| <i>SNORD113-2</i>  | 0,00 |
| <i>SNORD113-3</i>  | 0,00 |
| <i>SNORD114-18</i> | 0,00 |
| <i>MIR329-1</i>    | 0,00 |
| <i>MIR1193</i>     | 0,00 |
| <i>OR7G3</i>       | 0,00 |
| <i>MIR4750</i>     | 0,00 |
| <i>SNORD58B</i>    | 0,00 |
| <i>MIR103A2</i>    | 0,00 |
| <i>MIR103B2</i>    | 0,00 |
| <i>SNORA71B</i>    | 0,00 |
| <i>MIR1914</i>     | 0,00 |
| <i>MIR4650-1</i>   | 0,00 |
| <i>MIR3139</i>     | 0,00 |
| <i>SNORD20</i>     | 0,00 |
| <i>SNORA36B</i>    | 0,00 |
| <i>OR1L8</i>       | 0,00 |
| <i>SNORD36A</i>    | 0,00 |
| <i>DEFA8P</i>      | 0,00 |
| <i>MIR4287</i>     | 0,00 |
| <i>KRTAP5-4</i>    | 0,00 |
| <i>CDRT15L2</i>    | 0,00 |
| <i>OR5B3</i>       | 0,00 |
| <i>HBQ1</i>        | 0,00 |
| <i>FAM223B</i>     | 0,00 |
| <i>VPS13A-AS1</i>  | 0,00 |
| <i>ECRP</i>        | 0,00 |
| <i>KRTAP21-2</i>   | 0,00 |
| <i>OR8B8</i>       | 0,00 |
| <i>HIST2H3D</i>    | 0,00 |
| <i>FAM127B</i>     | 0,00 |
| <i>MPC1L</i>       | 0,00 |
| <i>HIST1H4C</i>    | 0,00 |



|                    |      |
|--------------------|------|
| <i>VCX3B</i>       | 0,00 |
| <i>IFNA13</i>      | 0,00 |
| <i>LILRB2</i>      | 0,00 |
| <i>C10orf120</i>   | 0,00 |
| <i>OR4D10</i>      | 0,00 |
| <i>MIR98</i>       | 0,00 |
| <i>TGIF2LX</i>     | 0,00 |
| <i>MIR448</i>      | 0,00 |
| <i>MIR2276</i>     | 0,00 |
| <i>MIR26A2</i>     | 0,00 |
| <i>MIR210</i>      | 0,00 |
| <i>MIR34B</i>      | 0,00 |
| <i>OR8B3</i>       | 0,00 |
| <i>MIR608</i>      | 0,00 |
| <i>MIR138-2</i>    | 0,00 |
| <i>SNORD116-9</i>  | 0,00 |
| <i>SNORD115-11</i> | 0,00 |
| <i>SNORD115-15</i> | 0,00 |
| <i>SNORD115-38</i> | 0,00 |
| <i>MIR3942</i>     | 0,00 |
| <i>MIR627</i>      | 0,00 |
| <i>MIR125A</i>     | 0,00 |
| <i>MIR521-1</i>    | 0,00 |
| <i>MIR4764</i>     | 0,00 |
| <i>MIR941-3</i>    | 0,00 |
| <i>MIR941-2</i>    | 0,00 |
| <i>MIR941-4</i>    | 0,00 |
| <i>HIST1H3E</i>    | 0,00 |
| <i>TREML5P</i>     | 0,00 |
| <i>MIR567</i>      | 0,00 |
| <i>MIR1244-1</i>   | 0,00 |
| <i>MIR5001</i>     | 0,00 |
| <i>MIR200B</i>     | 0,00 |
| <i>MIR3917</i>     | 0,00 |
| <i>MIR92B</i>      | 0,00 |
| <i>MIR4753</i>     | 0,00 |
| <i>OR2L5</i>       | 0,00 |
| <i>MIR491</i>      | 0,00 |
| <i>MIR4674</i>     | 0,00 |
| <i>OR11H12</i>     | 0,00 |
| <i>RNASE2</i>      | 0,00 |
| <i>NPBWR1</i>      | 0,00 |
| <i>APOA4</i>       | 0,00 |
| <i>CTAGE9</i>      | 0,00 |
| <i>MSMP</i>        | 0,00 |
| <i>KRT19P2</i>     | 0,00 |

|                     |      |
|---------------------|------|
| <i>HIST1H1C</i>     | 0,00 |
| <i>HBG1</i>         | 0,00 |
| <i>MIR3654</i>      | 0,00 |
| <i>ATP5L2</i>       | 0,00 |
| <i>PF4</i>          | 0,00 |
| <i>KRT16P1</i>      | 0,00 |
| <i>RNASE10</i>      | 0,00 |
| <i>SPANXD</i>       | 0,00 |
| <i>KRTAP10-1</i>    | 0,00 |
| <i>HIST2H2BF</i>    | 0,00 |
| <i>HIST1H4K</i>     | 0,00 |
| <i>SPANXE</i>       | 0,00 |
| <i>CSH2</i>         | 0,00 |
| <i>OR4C46</i>       | 0,00 |
| <i>OR4E2</i>        | 0,00 |
| <i>OR3A3</i>        | 0,00 |
| <i>HBM</i>          | 0,00 |
| <i>UBE2MP1</i>      | 0,00 |
| <i>OR11H2</i>       | 0,00 |
| <i>LOC392364</i>    | 0,00 |
| <i>RPL10L</i>       | 0,00 |
| <i>RHOXF2</i>       | 0,00 |
| <i>RHOXF2B</i>      | 0,00 |
| <i>OR2M2</i>        | 0,00 |
| <i>CYP21A1P</i>     | 0,00 |
| <i>HIST1H2APS1</i>  | 0,00 |
| <i>PAGE2</i>        | 0,00 |
| <i>FAM106A</i>      | 0,00 |
| <i>TAS2R42</i>      | 0,00 |
| <i>OR6C68</i>       | 0,00 |
| <i>OR7C2</i>        | 0,00 |
| <i>OR2A7</i>        | 0,00 |
| <i>HIST3H2BB</i>    | 0,00 |
| <i>SPAG11B</i>      | 0,00 |
| <i>KRTAP10-11</i>   | 0,00 |
| <i>CCRL2</i>        | 0,00 |
| <i>LOC643648</i>    | 0,00 |
| <i>FAM90A27P</i>    | 0,00 |
| <i>TMEM191B</i>     | 0,00 |
| <i>CCRL2</i>        | 0,00 |
| <i>GOLGA6A</i>      | 0,00 |
| <i>SPDYE2B</i>      | 0,00 |
| <i>CLEC11A</i>      | 0,00 |
| <i>HERC2P4</i>      | 0,00 |
| <i>PRAMEF21</i>     | 0,00 |
| <i>LOC100133920</i> | 0,00 |

|                      |      |
|----------------------|------|
| <i>FAM27E3</i>       | 0,00 |
| <i>ARHGDI1A</i>      | 0,00 |
| <i>VCX3A</i>         | 0,00 |
| <i>FOXD4L5</i>       | 0,00 |
| <i>SPACA5B</i>       | 0,00 |
| <i>HIST1H4F</i>      | 0,00 |
| <i>USP17L1P</i>      | 0,00 |
| <i>HSPA1A</i>        | 0,00 |
| <i>CTAG2</i>         | 0,00 |
| <i>LOC100134868</i>  | 0,00 |
| <i>PNMA6A</i>        | 0,00 |
| <i>APOA1</i>         | 0,00 |
| <i>CCR2</i>          | 0,00 |
| <i>HIST1H2BM</i>     | 0,00 |
| <i>OR2T29</i>        | 0,00 |
| <i>DEFB4B</i>        | 0,00 |
| <i>SPDYE8P</i>       | 0,00 |
| <i>LGALS7</i>        | 0,00 |
| <i>PNMA6D</i>        | 0,00 |
| <i>CTAGE15</i>       | 0,00 |
| <i>TRIM64</i>        | 0,00 |
| <i>PRAMEF20</i>      | 0,00 |
| <i>CCR2</i>          | 0,00 |
| <i>GAGE2B</i>        | 0,00 |
| <i>FLJ44511</i>      | 0,00 |
| <i>SPATA31A2</i>     | 0,00 |
| <i>SPATA31A1</i>     | 0,00 |
| <i>HERC2P7</i>       | 0,00 |
| <i>DEFB106B</i>      | 0,00 |
| <i>GOLGA8CP</i>      | 0,00 |
| <i>CCR5</i>          | 0,00 |
| <i>LOC100506076</i>  | 0,00 |
| <i>HSFX2</i>         | 0,00 |
| <i>HSFX1</i>         | 0,00 |
| <i>SLX1B-SULT1A4</i> | 0,00 |
| <i>MLLT4-AS1</i>     | 0,00 |
| <i>GAGE12J</i>       | 0,00 |
| <i>SLX1B</i>         | 0,00 |
| <i>DMRTC1B</i>       | 0,00 |
| <i>TAS1R3</i>        | 0,00 |
| <i>LOC643648</i>     | 0,00 |
| <i>TBC1D3F</i>       | 0,00 |
| <i>TBC1D3C</i>       | 0,00 |
| <i>TBC1D3</i>        | 0,00 |
| <i>DNM1P41</i>       | 0,00 |
| <i>GOLGA6C</i>       | 0,00 |

|                        |      |
|------------------------|------|
| <i>STAG3L1</i>         | 0,00 |
| <i>TBC1D3B</i>         | 0,00 |
| <i>USP17L6P</i>        | 0,00 |
| <i>LOC100190986</i>    | 0,00 |
| <i>SSX4B</i>           | 0,00 |
| <i>SSX4</i>            | 0,00 |
| <i>SULT1A4</i>         | 0,00 |
| <i>PRAMEF8</i>         | 0,00 |
| <i>FAM95B1</i>         | 0,00 |
| <i>SRSF10</i>          | 0,00 |
| <i>GAGE12I</i>         | 0,00 |
| <i>GAGE7</i>           | 0,00 |
| <i>GAGE4</i>           | 0,00 |
| <i>GAGE5</i>           | 0,00 |
| <i>BEND3P3</i>         | 0,00 |
| <i>LINC00891</i>       | 0,00 |
| <i>ACOT1</i>           | 0,00 |
| <i>SPDYE8P</i>         | 0,00 |
| <i>SRSF10</i>          | 0,00 |
| <i>ARL17B</i>          | 0,00 |
| <i>LINC00854</i>       | 0,00 |
| <i>GYG2P1</i>          | 0,00 |
| <i>LOC100505679</i>    | 0,00 |
| <i>PCYT2</i>           | 0,00 |
| <i>PCYT2</i>           | 0,00 |
| <i>NXF2B</i>           | 0,00 |
| <i>PCYT2</i>           | 0,00 |
| <i>FAM74A1</i>         | 0,00 |
| <i>C6orf123</i>        | 0,00 |
| <i>GOLGA8G</i>         | 0,00 |
| <i>DTYMK</i>           | 0,00 |
| <i>TTY15</i>           | 0,00 |
| <i>DGAT1</i>           | 0,00 |
| <i>KIR2DS3</i>         | 0,00 |
| <i>PDZK1P1</i>         | 0,00 |
| <i>KIR2DS5</i>         | 0,00 |
| <i>LIMS3-LOC440895</i> | 0,00 |
| <i>EIF1AY</i>          | 0,00 |
| <i>P4HB</i>            | 0,00 |
| <i>CT45A4</i>          | 0,00 |
| <i>FAM66E</i>          | 0,00 |
| <i>TMPRSS11E</i>       | 0,00 |
| <i>PCDH11Y</i>         | 0,00 |
| <i>TBL1Y</i>           | 0,00 |

**Table II** Gene symbol, mice normalized intensity of reads, mean of the duplicate, and hmC Fold enrichment (Dko vs wt), related to Fig. 3.a

| Gene symbol      | Mouse 16756<br>(Dko#1)<br>normalized<br>intensity of reads | Mouse 16641<br>(Dko#2)<br>normalized<br>intensity of reads | Mouse 16670<br>(WT#1)<br>normalized<br>intensity of reads | Mouse 16669<br>(WT#2)<br>normalized<br>intensity of reads | GPx1/2 Dko<br>intensity MEAN | WT intensity<br>MEAN | hmC Fold<br>enrichment (Dko<br>vs wt) |
|------------------|------------------------------------------------------------|------------------------------------------------------------|-----------------------------------------------------------|-----------------------------------------------------------|------------------------------|----------------------|---------------------------------------|
| <i>Mir3076</i>   | 0,00                                                       | 0,00                                                       | 0,34                                                      | 0,14                                                      | 0,00                         | 0,24                 | 0,00                                  |
| <i>Snord58b</i>  | 0,00                                                       | 0,00                                                       | 0,17                                                      | 0,25                                                      | 0,00                         | 0,21                 | 0,00                                  |
| <i>Mir92-1</i>   | 0,00                                                       | 0,00                                                       | 0,34                                                      | 0,07                                                      | 0,00                         | 0,20                 | 0,00                                  |
| <i>Mir26b</i>    | 0,00                                                       | 0,00                                                       | 0,21                                                      | 0,19                                                      | 0,00                         | 0,20                 | 0,00                                  |
| <i>Mir434</i>    | 0,00                                                       | 0,00                                                       | 0,26                                                      | 0,11                                                      | 0,00                         | 0,18                 | 0,00                                  |
| <i>Mir10a</i>    | 0,00                                                       | 0,00                                                       | 0,26                                                      | 0,11                                                      | 0,00                         | 0,18                 | 0,00                                  |
| <i>Mir488</i>    | 0,00                                                       | 0,00                                                       | 0,34                                                      | 0,01                                                      | 0,00                         | 0,17                 | 0,00                                  |
| <i>Mir3103</i>   | 0,00                                                       | 0,00                                                       | 0,34                                                      | 0,00                                                      | 0,00                         | 0,17                 | 0,00                                  |
| <i>Snord100</i>  | 0,00                                                       | 0,00                                                       | 0,06                                                      | 0,27                                                      | 0,00                         | 0,16                 | 0,00                                  |
| <i>Mir322</i>    | 0,00                                                       | 0,00                                                       | 0,22                                                      | 0,04                                                      | 0,00                         | 0,13                 | 0,00                                  |
| <i>Mir139</i>    | 0,00                                                       | 0,00                                                       | 0,22                                                      | 0,04                                                      | 0,00                         | 0,13                 | 0,00                                  |
| <i>Mir191</i>    | 0,00                                                       | 0,00                                                       | 0,06                                                      | 0,18                                                      | 0,00                         | 0,12                 | 0,00                                  |
| <i>Spr4</i>      | 0,00                                                       | 0,00                                                       | 0,08                                                      | 0,14                                                      | 0,00                         | 0,11                 | 0,00                                  |
| <i>Mir106a</i>   | 0,00                                                       | 0,00                                                       | 0,22                                                      | 0,00                                                      | 0,00                         | 0,11                 | 0,00                                  |
| <i>Mir540</i>    | 0,00                                                       | 0,00                                                       | 0,22                                                      | 0,00                                                      | 0,00                         | 0,11                 | 0,00                                  |
| <i>Mir1247</i>   | 0,00                                                       | 0,00                                                       | 0,22                                                      | 0,00                                                      | 0,00                         | 0,11                 | 0,00                                  |
| <i>Mir193b</i>   | 0,00                                                       | 0,00                                                       | 0,22                                                      | 0,00                                                      | 0,00                         | 0,11                 | 0,00                                  |
| <i>Mir706</i>    | 0,00                                                       | 0,00                                                       | 0,00                                                      | 0,21                                                      | 0,00                         | 0,11                 | 0,00                                  |
| <i>Mirlet7g</i>  | 0,00                                                       | 0,00                                                       | 0,17                                                      | 0,04                                                      | 0,00                         | 0,10                 | 0,00                                  |
| <i>Mir7-2</i>    | 0,00                                                       | 0,02                                                       | 0,17                                                      | 0,08                                                      | 0,01                         | 0,13                 | 0,07                                  |
| <i>Mir3061</i>   | 0,00                                                       | 0,02                                                       | 0,04                                                      | 0,21                                                      | 0,01                         | 0,13                 | 0,07                                  |
| <i>Mir1192</i>   | 0,00                                                       | 0,04                                                       | 0,28                                                      | 0,20                                                      | 0,02                         | 0,24                 | 0,08                                  |
| <i>Krtap19-3</i> | 0,00                                                       | 0,03                                                       | 0,24                                                      | 0,08                                                      | 0,02                         | 0,16                 | 0,10                                  |
| <i>Snora34</i>   | 0,00                                                       | 0,05                                                       | 0,47                                                      | 0,04                                                      | 0,03                         | 0,25                 | 0,10                                  |
| <i>Mir3075</i>   | 0,00                                                       | 0,03                                                       | 0,17                                                      | 0,17                                                      | 0,02                         | 0,17                 | 0,10                                  |
| <i>Mir31</i>     | 0,00                                                       | 0,03                                                       | 0,11                                                      | 0,21                                                      | 0,02                         | 0,16                 | 0,11                                  |

|                      |      |      |      |      |      |      |      |
|----------------------|------|------|------|------|------|------|------|
| <i>Scarna13</i>      | 0,00 | 0,04 | 0,37 | 0,05 | 0,02 | 0,21 | 0,11 |
| <i>Snord123</i>      | 0,00 | 0,07 | 0,45 | 0,17 | 0,03 | 0,31 | 0,11 |
| <i>Mir103-1</i>      | 0,00 | 0,07 | 0,22 | 0,39 | 0,03 | 0,31 | 0,11 |
| <i>Snora2b</i>       | 0,00 | 0,03 | 0,15 | 0,15 | 0,02 | 0,15 | 0,11 |
| <i>Mir1930</i>       | 0,00 | 0,05 | 0,22 | 0,21 | 0,03 | 0,22 | 0,12 |
| <i>Mir15a</i>        | 0,00 | 0,03 | 0,09 | 0,19 | 0,02 | 0,14 | 0,12 |
| <i>Mir1961</i>       | 0,00 | 0,10 | 0,22 | 0,58 | 0,05 | 0,40 | 0,13 |
| <i>Mir30a</i>        | 0,00 | 0,10 | 0,48 | 0,30 | 0,05 | 0,39 | 0,13 |
| <i>Snord35b</i>      | 0,00 | 0,12 | 0,58 | 0,30 | 0,06 | 0,44 | 0,14 |
| <i>Snora75</i>       | 0,00 | 0,03 | 0,22 | 0,01 | 0,02 | 0,12 | 0,15 |
| <i>Mir468</i>        | 0,00 | 0,05 | 0,28 | 0,05 | 0,03 | 0,17 | 0,15 |
| <i>Mir326</i>        | 0,00 | 0,14 | 0,39 | 0,48 | 0,07 | 0,44 | 0,16 |
| <i>Gm5547</i>        | 0,00 | 0,05 | 0,16 | 0,15 | 0,02 | 0,16 | 0,16 |
| <i>Hps6</i>          | 0,00 | 0,05 | 0,14 | 0,16 | 0,02 | 0,15 | 0,16 |
| <i>Snord69</i>       | 0,00 | 0,05 | 0,11 | 0,20 | 0,03 | 0,15 | 0,17 |
| <i>A630066F11Rik</i> | 0,02 | 0,03 | 0,18 | 0,08 | 0,02 | 0,13 | 0,17 |
| <i>Mir511</i>        | 0,00 | 0,05 | 0,22 | 0,07 | 0,03 | 0,15 | 0,17 |
| <i>Mir3095</i>       | 0,00 | 0,14 | 0,43 | 0,34 | 0,07 | 0,39 | 0,18 |
| <i>Snord96a</i>      | 0,00 | 0,05 | 0,06 | 0,23 | 0,03 | 0,14 | 0,18 |
| <i>Mir1929</i>       | 0,00 | 0,07 | 0,19 | 0,19 | 0,03 | 0,19 | 0,18 |
| <i>Snord1b</i>       | 0,00 | 0,13 | 0,51 | 0,18 | 0,06 | 0,34 | 0,19 |
| <i>Isg15</i>         | 0,10 | 0,04 | 0,44 | 0,27 | 0,07 | 0,36 | 0,19 |
| <i>D4Wsu53e</i>      | 0,00 | 0,06 | 0,18 | 0,12 | 0,03 | 0,15 | 0,20 |
| <i>Gm13580</i>       | 0,00 | 0,07 | 0,18 | 0,16 | 0,03 | 0,17 | 0,20 |
| <i>Mir429</i>        | 0,00 | 0,22 | 0,32 | 0,77 | 0,11 | 0,54 | 0,21 |
| <i>Sstr2</i>         | 0,01 | 0,09 | 0,20 | 0,28 | 0,05 | 0,24 | 0,21 |
| <i>1600014C23Rik</i> | 0,00 | 0,06 | 0,19 | 0,09 | 0,03 | 0,14 | 0,21 |
| <i>Snora28</i>       | 0,00 | 0,17 | 0,42 | 0,38 | 0,08 | 0,40 | 0,21 |
| <i>Mia</i>           | 0,04 | 0,09 | 0,35 | 0,26 | 0,06 | 0,31 | 0,21 |
| <i>Mir763</i>        | 0,00 | 0,19 | 0,49 | 0,40 | 0,09 | 0,44 | 0,21 |
| <i>Crip1</i>         | 0,06 | 0,13 | 0,47 | 0,38 | 0,09 | 0,43 | 0,21 |
| <i>Mir26a-1</i>      | 0,00 | 0,09 | 0,32 | 0,08 | 0,04 | 0,20 | 0,21 |

|                   |      |      |      |      |      |      |      |
|-------------------|------|------|------|------|------|------|------|
| <i>H2-Q8</i>      | 0,05 | 0,03 | 0,21 | 0,12 | 0,04 | 0,17 | 0,21 |
| <i>Mir147</i>     | 0,00 | 0,10 | 0,34 | 0,14 | 0,05 | 0,24 | 0,22 |
| <i>Snord37</i>    | 0,27 | 0,21 | 1,32 | 0,89 | 0,24 | 1,10 | 0,22 |
| <i>H2-Q6</i>      | 0,05 | 0,03 | 0,21 | 0,12 | 0,04 | 0,17 | 0,22 |
| <i>Cyhr1</i>      | 0,05 | 0,09 | 0,39 | 0,23 | 0,07 | 0,31 | 0,23 |
| <i>Leng9</i>      | 0,02 | 0,04 | 0,18 | 0,09 | 0,03 | 0,13 | 0,23 |
| <i>Aprt</i>       | 0,05 | 0,04 | 0,23 | 0,14 | 0,04 | 0,19 | 0,23 |
| <i>Sstr2</i>      | 0,01 | 0,16 | 0,29 | 0,42 | 0,08 | 0,36 | 0,24 |
| <i>Nfe2l1</i>     | 0,02 | 0,06 | 0,19 | 0,15 | 0,04 | 0,17 | 0,24 |
| <i>Nfe2l1</i>     | 0,02 | 0,06 | 0,19 | 0,16 | 0,04 | 0,17 | 0,24 |
| <i>Mir20a</i>     | 0,00 | 0,21 | 0,34 | 0,53 | 0,10 | 0,43 | 0,24 |
| <i>Pck1</i>       | 0,13 | 0,15 | 0,65 | 0,50 | 0,14 | 0,58 | 0,24 |
| <i>Cct8l1</i>     | 0,01 | 0,08 | 0,17 | 0,24 | 0,05 | 0,20 | 0,24 |
| <i>Gjb5</i>       | 0,02 | 0,11 | 0,25 | 0,25 | 0,06 | 0,25 | 0,24 |
| <i>Cdx2</i>       | 0,05 | 0,04 | 0,21 | 0,14 | 0,04 | 0,17 | 0,24 |
| <i>Mdp1</i>       | 0,02 | 0,15 | 0,37 | 0,34 | 0,09 | 0,35 | 0,25 |
| <i>Nat9</i>       | 0,07 | 0,07 | 0,31 | 0,26 | 0,07 | 0,28 | 0,25 |
| <i>Hrc</i>        | 0,01 | 0,07 | 0,14 | 0,20 | 0,04 | 0,17 | 0,25 |
| <i>Pabpn1</i>     | 0,01 | 0,07 | 0,19 | 0,15 | 0,04 | 0,17 | 0,25 |
| <i>Gm5111</i>     | 0,05 | 0,04 | 0,07 | 0,28 | 0,04 | 0,17 | 0,26 |
| <i>Mir1982</i>    | 0,00 | 0,16 | 0,42 | 0,18 | 0,08 | 0,30 | 0,26 |
| <i>Lenep</i>      | 0,04 | 0,05 | 0,29 | 0,08 | 0,05 | 0,19 | 0,26 |
| <i>Aurkaip1</i>   | 0,03 | 0,04 | 0,14 | 0,14 | 0,04 | 0,14 | 0,26 |
| <i>Cyhr1</i>      | 0,04 | 0,09 | 0,30 | 0,18 | 0,07 | 0,24 | 0,27 |
| <i>Mir3069</i>    | 0,00 | 0,16 | 0,45 | 0,12 | 0,08 | 0,29 | 0,27 |
| <i>Tigd5</i>      | 0,03 | 0,07 | 0,20 | 0,20 | 0,05 | 0,20 | 0,27 |
| <i>Mirlet7c-2</i> | 0,00 | 0,40 | 0,62 | 0,82 | 0,20 | 0,72 | 0,28 |
| <i>Gpbar1</i>     | 0,00 | 0,08 | 0,16 | 0,12 | 0,04 | 0,14 | 0,28 |
| <i>Mir1981</i>    | 0,27 | 0,24 | 0,86 | 0,97 | 0,26 | 0,92 | 0,28 |
| <i>Mir1190</i>    | 0,00 | 0,22 | 0,39 | 0,39 | 0,11 | 0,39 | 0,28 |
| <i>Dbil5</i>      | 0,10 | 0,07 | 0,39 | 0,22 | 0,09 | 0,30 | 0,28 |
| <i>Gm14873</i>    | 0,00 | 0,12 | 0,16 | 0,26 | 0,06 | 0,21 | 0,28 |

|                      |      |      |      |      |      |      |      |
|----------------------|------|------|------|------|------|------|------|
| <i>1700018L02Rik</i> | 0,00 | 0,15 | 0,32 | 0,23 | 0,08 | 0,27 | 0,28 |
| <i>Coa4</i>          | 0,04 | 0,12 | 0,31 | 0,24 | 0,08 | 0,27 | 0,29 |
| <i>Mir29c</i>        | 0,18 | 0,05 | 0,47 | 0,34 | 0,12 | 0,41 | 0,29 |
| <i>Mir340</i>        | 0,27 | 0,19 | 0,94 | 0,66 | 0,23 | 0,80 | 0,29 |
| <i>BC048609</i>      | 0,09 | 0,06 | 0,33 | 0,18 | 0,07 | 0,26 | 0,29 |
| <i>4930539J05Rik</i> | 0,07 | 0,05 | 0,20 | 0,20 | 0,06 | 0,20 | 0,29 |
| <i>S100a16</i>       | 0,06 | 0,09 | 0,30 | 0,18 | 0,07 | 0,24 | 0,30 |
| <i>AA388235</i>      | 0,06 | 0,05 | 0,22 | 0,15 | 0,06 | 0,19 | 0,30 |
| <i>Cyp8b1</i>        | 0,11 | 0,12 | 0,38 | 0,34 | 0,11 | 0,36 | 0,31 |
| <i>Defb45</i>        | 0,07 | 0,06 | 0,19 | 0,23 | 0,06 | 0,21 | 0,31 |
| <i>Cend1</i>         | 0,07 | 0,10 | 0,33 | 0,23 | 0,09 | 0,28 | 0,31 |
| <i>Gstp2</i>         | 0,07 | 0,08 | 0,28 | 0,22 | 0,08 | 0,25 | 0,31 |
| <i>Mir505</i>        | 0,00 | 0,16 | 0,28 | 0,22 | 0,08 | 0,25 | 0,31 |
| <i>BC068157</i>      | 0,03 | 0,07 | 0,16 | 0,16 | 0,05 | 0,16 | 0,31 |
| <i>Ankrd9</i>        | 0,13 | 0,18 | 0,56 | 0,44 | 0,16 | 0,50 | 0,31 |
| <i>Mir1839</i>       | 0,00 | 0,23 | 0,34 | 0,41 | 0,12 | 0,37 | 0,31 |
| <i>Mir3058</i>       | 0,27 | 0,48 | 1,31 | 1,10 | 0,38 | 1,20 | 0,31 |
| <i>Tgm3</i>          | 0,07 | 0,05 | 0,21 | 0,20 | 0,06 | 0,20 | 0,31 |
| <i>Gdap10</i>        | 0,07 | 0,10 | 0,25 | 0,27 | 0,08 | 0,26 | 0,31 |
| <i>Atp12a</i>        | 0,05 | 0,05 | 0,18 | 0,14 | 0,05 | 0,16 | 0,32 |
| <i>Mpv17l2</i>       | 0,15 | 0,08 | 0,43 | 0,32 | 0,12 | 0,37 | 0,32 |
| <i>Tnp2</i>          | 0,00 | 0,12 | 0,19 | 0,19 | 0,06 | 0,19 | 0,32 |
| <i>Mir3063</i>       | 0,00 | 0,12 | 0,26 | 0,12 | 0,06 | 0,19 | 0,32 |
| <i>Fhl1</i>          | 0,04 | 0,05 | 0,14 | 0,16 | 0,05 | 0,15 | 0,32 |
| <i>Snord16a</i>      | 0,00 | 0,10 | 0,11 | 0,21 | 0,05 | 0,16 | 0,32 |
| <i>Tusc2</i>         | 0,11 | 0,06 | 0,26 | 0,28 | 0,09 | 0,27 | 0,32 |
| <i>Dcaf11</i>        | 0,06 | 0,04 | 0,20 | 0,11 | 0,05 | 0,15 | 0,32 |
| <i>Gm10485</i>       | 0,04 | 0,12 | 0,26 | 0,24 | 0,08 | 0,25 | 0,33 |
| <i>Slc16a11</i>      | 0,05 | 0,10 | 0,27 | 0,20 | 0,08 | 0,23 | 0,33 |
| <i>Tppp</i>          | 0,09 | 0,07 | 0,25 | 0,22 | 0,08 | 0,24 | 0,33 |
| <i>Mir3968</i>       | 0,59 | 0,38 | 1,78 | 1,16 | 0,48 | 1,47 | 0,33 |
| <i>Mir532</i>        | 0,00 | 0,16 | 0,19 | 0,28 | 0,08 | 0,24 | 0,33 |



|                      |      |      |      |      |      |      |      |
|----------------------|------|------|------|------|------|------|------|
| <i>1700119H24Rik</i> | 0,12 | 0,09 | 0,36 | 0,29 | 0,11 | 0,32 | 0,33 |
| <i>Mir205</i>        | 0,14 | 0,00 | 0,00 | 0,41 | 0,07 | 0,20 | 0,33 |
| <i>Tbx6</i>          | 0,08 | 0,08 | 0,29 | 0,20 | 0,08 | 0,25 | 0,33 |
| <i>Cldn9</i>         | 0,02 | 0,10 | 0,16 | 0,19 | 0,06 | 0,18 | 0,33 |
| <i>Gm757</i>         | 0,04 | 0,06 | 0,17 | 0,14 | 0,05 | 0,16 | 0,33 |
| <i>Fv1</i>           | 0,06 | 0,05 | 0,17 | 0,15 | 0,05 | 0,16 | 0,34 |
| <i>Sertad1</i>       | 0,15 | 0,08 | 0,41 | 0,26 | 0,11 | 0,34 | 0,34 |
| <i>4933427E11Rik</i> | 0,09 | 0,07 | 0,28 | 0,20 | 0,08 | 0,24 | 0,34 |
| <i>Stub1</i>         | 0,04 | 0,12 | 0,26 | 0,21 | 0,08 | 0,24 | 0,34 |
| <i>Aqp8</i>          | 0,06 | 0,08 | 0,22 | 0,20 | 0,07 | 0,21 | 0,34 |
| <i>Rxfp4</i>         | 0,18 | 0,15 | 0,54 | 0,42 | 0,16 | 0,48 | 0,34 |
| <i>Gpr137</i>        | 0,07 | 0,12 | 0,35 | 0,22 | 0,10 | 0,29 | 0,34 |
| <i>Gpr137</i>        | 0,08 | 0,13 | 0,38 | 0,23 | 0,11 | 0,31 | 0,34 |
| <i>Gstm5</i>         | 0,06 | 0,05 | 0,14 | 0,17 | 0,05 | 0,16 | 0,34 |
| <i>Vamp8</i>         | 0,05 | 0,07 | 0,23 | 0,14 | 0,06 | 0,18 | 0,34 |
| <i>Slc50a1</i>       | 0,02 | 0,24 | 0,40 | 0,34 | 0,13 | 0,37 | 0,35 |
| <i>Gpr137</i>        | 0,06 | 0,10 | 0,28 | 0,17 | 0,08 | 0,23 | 0,35 |
| <i>Vmo1</i>          | 0,12 | 0,03 | 0,21 | 0,19 | 0,07 | 0,20 | 0,35 |
| <i>Map1lc3a</i>      | 0,02 | 0,11 | 0,18 | 0,18 | 0,06 | 0,18 | 0,36 |
| <i>Efna1</i>         | 0,10 | 0,09 | 0,29 | 0,24 | 0,10 | 0,26 | 0,36 |
| <i>Dusp28</i>        | 0,18 | 0,07 | 0,40 | 0,28 | 0,12 | 0,34 | 0,36 |
| <i>Pnpo</i>          | 0,15 | 0,11 | 0,41 | 0,31 | 0,13 | 0,36 | 0,36 |
| <i>Ndufv1</i>        | 0,05 | 0,07 | 0,21 | 0,12 | 0,06 | 0,16 | 0,36 |
| <i>Cyp2c55</i>       | 0,08 | 0,04 | 0,15 | 0,17 | 0,06 | 0,16 | 0,36 |
| <i>Efna1</i>         | 0,12 | 0,10 | 0,32 | 0,28 | 0,11 | 0,30 | 0,36 |
| <i>5033406O09Rik</i> | 0,07 | 0,13 | 0,31 | 0,22 | 0,10 | 0,27 | 0,37 |
| <i>Pmp22</i>         | 0,10 | 0,09 | 0,27 | 0,25 | 0,10 | 0,26 | 0,37 |
| <i>Gm2061</i>        | 0,18 | 0,09 | 0,38 | 0,34 | 0,13 | 0,36 | 0,37 |
| <i>Khynyn</i>        | 0,10 | 0,09 | 0,29 | 0,24 | 0,10 | 0,27 | 0,37 |
| <i>Psmb8</i>         | 0,09 | 0,09 | 0,25 | 0,23 | 0,09 | 0,24 | 0,37 |
| <i>Polr1c</i>        | 0,03 | 0,12 | 0,23 | 0,17 | 0,07 | 0,20 | 0,37 |
| <i>Mir26a-2</i>      | 0,00 | 0,19 | 0,36 | 0,15 | 0,09 | 0,25 | 0,37 |

|                      |      |      |      |      |      |      |      |
|----------------------|------|------|------|------|------|------|------|
| <i>Espn</i>          | 0,13 | 0,09 | 0,32 | 0,28 | 0,11 | 0,30 | 0,37 |
| <i>Lefty1</i>        | 0,08 | 0,13 | 0,31 | 0,26 | 0,11 | 0,28 | 0,37 |
| <i>Sigmar1</i>       | 0,08 | 0,08 | 0,22 | 0,21 | 0,08 | 0,21 | 0,37 |
| <i>Spaca4</i>        | 0,12 | 0,33 | 0,78 | 0,41 | 0,23 | 0,60 | 0,38 |
| <i>Mir700</i>        | 0,00 | 0,23 | 0,42 | 0,20 | 0,12 | 0,31 | 0,38 |
| <i>Mapk15</i>        | 0,08 | 0,10 | 0,28 | 0,18 | 0,09 | 0,23 | 0,38 |
| <i>Ppp1r27</i>       | 0,10 | 0,03 | 0,17 | 0,18 | 0,07 | 0,18 | 0,38 |
| <i>Pfdn5</i>         | 0,03 | 0,11 | 0,22 | 0,14 | 0,07 | 0,18 | 0,38 |
| <i>Hcfc1r1</i>       | 0,00 | 0,14 | 0,20 | 0,17 | 0,07 | 0,19 | 0,38 |
| <i>Arhgdia</i>       | 0,09 | 0,10 | 0,29 | 0,21 | 0,10 | 0,25 | 0,38 |
| <i>Mir33</i>         | 0,00 | 0,13 | 0,34 | 0,00 | 0,06 | 0,17 | 0,38 |
| <i>Tmem115</i>       | 0,08 | 0,08 | 0,26 | 0,18 | 0,08 | 0,22 | 0,38 |
| <i>Gm6654</i>        | 0,15 | 0,09 | 0,42 | 0,20 | 0,12 | 0,31 | 0,39 |
| <i>Rnf223</i>        | 0,10 | 0,07 | 0,18 | 0,26 | 0,08 | 0,22 | 0,39 |
| <i>Fau</i>           | 0,10 | 0,04 | 0,22 | 0,15 | 0,07 | 0,19 | 0,39 |
| <i>Slc20a1</i>       | 0,13 | 0,09 | 0,28 | 0,29 | 0,11 | 0,29 | 0,39 |
| <i>Gpt</i>           | 0,14 | 0,16 | 0,45 | 0,31 | 0,15 | 0,38 | 0,39 |
| <i>Mir704</i>        | 0,00 | 0,13 | 0,22 | 0,11 | 0,06 | 0,17 | 0,39 |
| <i>Fau</i>           | 0,10 | 0,05 | 0,23 | 0,16 | 0,08 | 0,19 | 0,39 |
| <i>Ift20</i>         | 0,06 | 0,07 | 0,21 | 0,13 | 0,07 | 0,17 | 0,39 |
| <i>Tmed6</i>         | 0,06 | 0,08 | 0,19 | 0,18 | 0,07 | 0,19 | 0,39 |
| <i>Rfxank</i>        | 0,06 | 0,08 | 0,19 | 0,16 | 0,07 | 0,17 | 0,39 |
| <i>Al854703</i>      | 0,11 | 0,11 | 0,30 | 0,27 | 0,11 | 0,28 | 0,39 |
| <i>Slc26a3</i>       | 0,14 | 0,13 | 0,34 | 0,33 | 0,13 | 0,34 | 0,39 |
| <i>Fam134b</i>       | 0,13 | 0,09 | 0,28 | 0,26 | 0,11 | 0,27 | 0,39 |
| <i>Fbxo32</i>        | 0,08 | 0,08 | 0,22 | 0,19 | 0,08 | 0,20 | 0,40 |
| <i>A430035B10Rik</i> | 0,21 | 0,10 | 0,44 | 0,35 | 0,16 | 0,39 | 0,40 |
| <i>Fam134b</i>       | 0,13 | 0,09 | 0,29 | 0,28 | 0,11 | 0,29 | 0,40 |
| <i>Ihh</i>           | 0,06 | 0,09 | 0,18 | 0,20 | 0,08 | 0,19 | 0,40 |
| <i>Coasy</i>         | 0,06 | 0,11 | 0,26 | 0,17 | 0,09 | 0,21 | 0,40 |
| <i>Klhdc3</i>        | 0,05 | 0,12 | 0,23 | 0,21 | 0,09 | 0,22 | 0,40 |
| <i>Fam134b</i>       | 0,13 | 0,09 | 0,29 | 0,28 | 0,11 | 0,28 | 0,40 |

|                      |      |      |      |      |      |      |      |
|----------------------|------|------|------|------|------|------|------|
| <i>Slc20a1</i>       | 0,10 | 0,09 | 0,26 | 0,23 | 0,10 | 0,25 | 0,40 |
| <i>Atp5b</i>         | 0,16 | 0,10 | 0,39 | 0,25 | 0,13 | 0,32 | 0,40 |
| <i>D830046C22Rik</i> | 0,10 | 0,11 | 0,30 | 0,21 | 0,10 | 0,26 | 0,40 |
| <i>Cox6a1</i>        | 0,09 | 0,09 | 0,23 | 0,21 | 0,09 | 0,22 | 0,40 |
| <i>Pmaip1</i>        | 0,11 | 0,13 | 0,31 | 0,29 | 0,12 | 0,30 | 0,40 |
| <i>Trim15</i>        | 0,08 | 0,08 | 0,23 | 0,19 | 0,08 | 0,21 | 0,40 |
| <i>Trim15</i>        | 0,08 | 0,08 | 0,23 | 0,19 | 0,08 | 0,21 | 0,40 |
| <i>Slc39a5</i>       | 0,04 | 0,10 | 0,16 | 0,18 | 0,07 | 0,17 | 0,40 |
| <i>Slc39a5</i>       | 0,04 | 0,12 | 0,19 | 0,21 | 0,08 | 0,20 | 0,40 |
| <i>Slc39a5</i>       | 0,04 | 0,12 | 0,19 | 0,20 | 0,08 | 0,19 | 0,40 |
| <i>Commd5</i>        | 0,08 | 0,08 | 0,22 | 0,18 | 0,08 | 0,20 | 0,41 |
| <i>Ankrd23</i>       | 0,10 | 0,08 | 0,25 | 0,20 | 0,09 | 0,22 | 0,41 |
| <i>Fam134b</i>       | 0,14 | 0,09 | 0,30 | 0,27 | 0,12 | 0,29 | 0,41 |
| <i>Tmem174</i>       | 0,09 | 0,20 | 0,40 | 0,33 | 0,15 | 0,36 | 0,41 |
| <i>Tnfrsf25</i>      | 0,11 | 0,06 | 0,21 | 0,21 | 0,09 | 0,21 | 0,41 |
| <i>Cox14</i>         | 0,12 | 0,12 | 0,33 | 0,26 | 0,12 | 0,29 | 0,41 |
| <i>AI837181</i>      | 0,18 | 0,13 | 0,45 | 0,30 | 0,15 | 0,38 | 0,41 |
| <i>Tmem79</i>        | 0,06 | 0,10 | 0,23 | 0,17 | 0,08 | 0,20 | 0,41 |
| <i>Adh1</i>          | 0,12 | 0,07 | 0,23 | 0,23 | 0,10 | 0,23 | 0,41 |
| <i>Eif4ebp3</i>      | 0,14 | 0,07 | 0,27 | 0,24 | 0,11 | 0,26 | 0,41 |
| <i>Fam166a</i>       | 0,05 | 0,10 | 0,25 | 0,13 | 0,08 | 0,19 | 0,41 |
| <i>Pdp2</i>          | 0,25 | 0,17 | 0,50 | 0,52 | 0,21 | 0,51 | 0,41 |
| <i>Tctex1d4</i>      | 0,20 | 0,17 | 0,42 | 0,49 | 0,19 | 0,45 | 0,41 |
| <i>Snord71</i>       | 0,00 | 0,18 | 0,22 | 0,21 | 0,09 | 0,22 | 0,41 |
| <i>Nfe2l1</i>        | 0,07 | 0,09 | 0,23 | 0,16 | 0,08 | 0,19 | 0,41 |
| <i>Lsm4</i>          | 0,18 | 0,11 | 0,43 | 0,27 | 0,15 | 0,35 | 0,41 |
| <i>AU023871</i>      | 0,15 | 0,10 | 0,30 | 0,30 | 0,12 | 0,30 | 0,42 |
| <i>Cdk3-ps</i>       | 0,05 | 0,16 | 0,29 | 0,22 | 0,11 | 0,25 | 0,42 |
| <i>Rogdi</i>         | 0,13 | 0,15 | 0,37 | 0,31 | 0,14 | 0,34 | 0,42 |
| <i>Nfe2l1</i>        | 0,07 | 0,09 | 0,22 | 0,16 | 0,08 | 0,19 | 0,42 |
| <i>Uqcr10</i>        | 0,07 | 0,08 | 0,24 | 0,11 | 0,07 | 0,17 | 0,42 |
| <i>Cdk2ap2</i>       | 0,14 | 0,24 | 0,47 | 0,41 | 0,19 | 0,44 | 0,42 |

|                      |      |      |      |      |      |      |      |
|----------------------|------|------|------|------|------|------|------|
| <i>G0s2</i>          | 0,05 | 0,12 | 0,11 | 0,29 | 0,08 | 0,20 | 0,42 |
| <i>Zfp707</i>        | 0,13 | 0,09 | 0,25 | 0,26 | 0,11 | 0,26 | 0,42 |
| <i>Aldoa</i>         | 0,14 | 0,06 | 0,30 | 0,18 | 0,10 | 0,24 | 0,42 |
| <i>Aldoa</i>         | 0,14 | 0,06 | 0,31 | 0,18 | 0,10 | 0,24 | 0,42 |
| <i>1810007106Rik</i> | 0,07 | 0,08 | 0,20 | 0,17 | 0,08 | 0,18 | 0,42 |
| <i>Lsm10</i>         | 0,08 | 0,10 | 0,23 | 0,20 | 0,09 | 0,21 | 0,43 |
| <i>Smdt1</i>         | 0,21 | 0,16 | 0,50 | 0,38 | 0,19 | 0,44 | 0,43 |
| <i>Gpsm3</i>         | 0,11 | 0,11 | 0,34 | 0,17 | 0,11 | 0,25 | 0,43 |
| <i>Slc10a5</i>       | 0,13 | 0,22 | 0,40 | 0,43 | 0,18 | 0,41 | 0,43 |
| <i>Ly6g6c</i>        | 0,12 | 0,10 | 0,27 | 0,24 | 0,11 | 0,26 | 0,43 |
| <i>Fam83e</i>        | 0,17 | 0,21 | 0,53 | 0,35 | 0,19 | 0,44 | 0,43 |
| <i>Snx15</i>         | 0,14 | 0,14 | 0,35 | 0,30 | 0,14 | 0,33 | 0,43 |
| <i>Dnase2a</i>       | 0,07 | 0,10 | 0,22 | 0,16 | 0,08 | 0,19 | 0,43 |
| <i>Atp6v0b</i>       | 0,04 | 0,11 | 0,18 | 0,18 | 0,08 | 0,18 | 0,43 |
| <i>Ckmt1</i>         | 0,18 | 0,15 | 0,37 | 0,40 | 0,17 | 0,38 | 0,43 |
| <i>Brk1</i>          | 0,10 | 0,11 | 0,27 | 0,21 | 0,10 | 0,24 | 0,43 |
| <i>Mirlet7d</i>      | 0,09 | 0,29 | 0,45 | 0,44 | 0,19 | 0,44 | 0,43 |
| <i>Sult1a1</i>       | 0,17 | 0,14 | 0,37 | 0,33 | 0,15 | 0,35 | 0,43 |
| <i>Ptger1</i>        | 0,15 | 0,17 | 0,40 | 0,33 | 0,16 | 0,37 | 0,43 |
| <i>Slc4a2</i>        | 0,11 | 0,09 | 0,24 | 0,22 | 0,10 | 0,23 | 0,43 |
| <i>Mxd1</i>          | 0,27 | 0,20 | 0,56 | 0,51 | 0,23 | 0,53 | 0,43 |
| <i>Pnkf</i>          | 0,12 | 0,07 | 0,28 | 0,17 | 0,10 | 0,22 | 0,44 |
| <i>Gjb3</i>          | 0,10 | 0,06 | 0,21 | 0,17 | 0,08 | 0,19 | 0,44 |
| <i>BC037034</i>      | 0,09 | 0,10 | 0,20 | 0,24 | 0,10 | 0,22 | 0,44 |
| <i>Rps4y2</i>        | 0,17 | 0,07 | 0,37 | 0,18 | 0,12 | 0,28 | 0,44 |
| <i>2010010A06Rik</i> | 0,14 | 0,14 | 0,34 | 0,30 | 0,14 | 0,32 | 0,44 |
| <i>Usp2</i>          | 0,10 | 0,09 | 0,20 | 0,23 | 0,09 | 0,22 | 0,44 |
| <i>Gjb3</i>          | 0,15 | 0,09 | 0,29 | 0,23 | 0,12 | 0,26 | 0,44 |
| <i>Tmem258</i>       | 0,05 | 0,16 | 0,24 | 0,22 | 0,10 | 0,23 | 0,44 |
| <i>Tsc22d1</i>       | 0,16 | 0,20 | 0,34 | 0,47 | 0,18 | 0,41 | 0,44 |
| <i>Aldoa</i>         | 0,13 | 0,05 | 0,26 | 0,15 | 0,09 | 0,20 | 0,44 |
| <i>Slc15a1</i>       | 0,09 | 0,07 | 0,18 | 0,20 | 0,08 | 0,19 | 0,44 |

|                 |      |      |      |      |      |      |      |
|-----------------|------|------|------|------|------|------|------|
| <i>Dusp1</i>    | 0,13 | 0,10 | 0,22 | 0,28 | 0,11 | 0,25 | 0,44 |
| 4930483J18Rik   | 0,08 | 0,13 | 0,29 | 0,19 | 0,11 | 0,24 | 0,44 |
| <i>Spef1</i>    | 0,05 | 0,11 | 0,21 | 0,16 | 0,08 | 0,18 | 0,44 |
| <i>Ccng2</i>    | 0,15 | 0,07 | 0,22 | 0,28 | 0,11 | 0,25 | 0,44 |
| <i>Ensa</i>     | 0,15 | 0,10 | 0,36 | 0,19 | 0,12 | 0,28 | 0,44 |
| <i>Cd68</i>     | 0,09 | 0,24 | 0,47 | 0,26 | 0,16 | 0,37 | 0,44 |
| <i>Acaa1a</i>   | 0,12 | 0,07 | 0,21 | 0,20 | 0,09 | 0,21 | 0,44 |
| <i>Cdkn2b</i>   | 0,10 | 0,15 | 0,29 | 0,28 | 0,13 | 0,28 | 0,44 |
| <i>Retsat</i>   | 0,10 | 0,15 | 0,30 | 0,27 | 0,13 | 0,28 | 0,44 |
| <i>Hist1h1t</i> | 0,14 | 0,42 | 0,65 | 0,62 | 0,28 | 0,64 | 0,44 |
| <i>Mir761</i>   | 0,00 | 0,18 | 0,34 | 0,07 | 0,09 | 0,20 | 0,44 |
| Gm14446         | 0,13 | 0,12 | 0,30 | 0,28 | 0,13 | 0,29 | 0,44 |
| <i>Ube2m</i>    | 0,10 | 0,07 | 0,21 | 0,17 | 0,08 | 0,19 | 0,44 |
| <i>Ube2m</i>    | 0,11 | 0,08 | 0,24 | 0,19 | 0,10 | 0,22 | 0,44 |
| <i>Plk3</i>     | 0,13 | 0,19 | 0,34 | 0,37 | 0,16 | 0,35 | 0,44 |
| <i>Cideb</i>    | 0,10 | 0,10 | 0,21 | 0,24 | 0,10 | 0,23 | 0,44 |
| <i>Krt15</i>    | 0,11 | 0,07 | 0,24 | 0,16 | 0,09 | 0,20 | 0,45 |
| <i>Hspb9</i>    | 0,07 | 0,11 | 0,21 | 0,20 | 0,09 | 0,21 | 0,45 |
| <i>Mir677</i>   | 0,81 | 0,23 | 1,46 | 0,89 | 0,52 | 1,17 | 0,45 |
| <i>Gtpbp2</i>   | 0,14 | 0,15 | 0,33 | 0,33 | 0,15 | 0,33 | 0,45 |
| <i>Mir1904</i>  | 0,00 | 0,36 | 0,42 | 0,39 | 0,18 | 0,41 | 0,45 |
| <i>Sema4g</i>   | 0,13 | 0,12 | 0,30 | 0,27 | 0,13 | 0,28 | 0,45 |
| <i>Sowahb</i>   | 0,26 | 0,20 | 0,55 | 0,48 | 0,23 | 0,51 | 0,45 |
| <i>Fis1</i>     | 0,04 | 0,16 | 0,23 | 0,21 | 0,10 | 0,22 | 0,45 |
| <i>Polr2e</i>   | 0,07 | 0,10 | 0,17 | 0,20 | 0,08 | 0,19 | 0,45 |
| <i>Espn</i>     | 0,13 | 0,09 | 0,26 | 0,23 | 0,11 | 0,24 | 0,45 |
| <i>Slc4a2</i>   | 0,10 | 0,09 | 0,21 | 0,19 | 0,09 | 0,20 | 0,45 |
| <i>Slc25a35</i> | 0,16 | 0,12 | 0,34 | 0,27 | 0,14 | 0,30 | 0,45 |
| <i>Mat2a</i>    | 0,09 | 0,11 | 0,23 | 0,22 | 0,10 | 0,22 | 0,45 |
| 2010001M06Rik   | 0,17 | 0,11 | 0,40 | 0,21 | 0,14 | 0,31 | 0,45 |
| <i>Adprm</i>    | 0,08 | 0,14 | 0,25 | 0,23 | 0,11 | 0,24 | 0,45 |
| <i>Psm7</i>     | 0,12 | 0,08 | 0,24 | 0,20 | 0,10 | 0,22 | 0,45 |

|                      |      |      |      |      |      |      |      |
|----------------------|------|------|------|------|------|------|------|
| <i>Entpd8</i>        | 0,13 | 0,11 | 0,29 | 0,24 | 0,12 | 0,27 | 0,46 |
| <i>Pomgnt1</i>       | 0,20 | 0,20 | 0,47 | 0,41 | 0,20 | 0,44 | 0,46 |
| <i>Rnf181</i>        | 0,10 | 0,10 | 0,25 | 0,20 | 0,10 | 0,22 | 0,46 |
| <i>Trim56</i>        | 0,12 | 0,14 | 0,27 | 0,31 | 0,13 | 0,29 | 0,46 |
| <i>Tymp</i>          | 0,11 | 0,11 | 0,20 | 0,26 | 0,11 | 0,23 | 0,46 |
| <i>Nkiras2</i>       | 0,18 | 0,14 | 0,35 | 0,35 | 0,16 | 0,35 | 0,46 |
| <i>Gpha2</i>         | 0,02 | 0,20 | 0,32 | 0,17 | 0,11 | 0,25 | 0,46 |
| <i>Cldn23</i>        | 0,13 | 0,09 | 0,24 | 0,26 | 0,11 | 0,25 | 0,46 |
| <i>Dpep1</i>         | 0,10 | 0,10 | 0,24 | 0,20 | 0,10 | 0,22 | 0,46 |
| <i>Misp</i>          | 0,16 | 0,20 | 0,37 | 0,43 | 0,18 | 0,40 | 0,46 |
| <i>Synpo</i>         | 0,15 | 0,14 | 0,29 | 0,33 | 0,14 | 0,31 | 0,46 |
| <i>Prss32</i>        | 0,11 | 0,10 | 0,24 | 0,21 | 0,10 | 0,22 | 0,46 |
| <i>Gsdmd</i>         | 0,11 | 0,15 | 0,31 | 0,26 | 0,13 | 0,28 | 0,46 |
| <i>Gm14446</i>       | 0,11 | 0,09 | 0,22 | 0,21 | 0,10 | 0,22 | 0,46 |
| <i>Otub1</i>         | 0,12 | 0,10 | 0,23 | 0,25 | 0,11 | 0,24 | 0,46 |
| <i>Usp2</i>          | 0,09 | 0,08 | 0,19 | 0,18 | 0,09 | 0,19 | 0,46 |
| <i>Fkbp1a</i>        | 0,10 | 0,10 | 0,25 | 0,20 | 0,10 | 0,22 | 0,46 |
| <i>Igsf9</i>         | 0,14 | 0,12 | 0,29 | 0,27 | 0,13 | 0,28 | 0,46 |
| <i>Uchl4</i>         | 0,14 | 0,32 | 0,56 | 0,46 | 0,23 | 0,51 | 0,46 |
| <i>Igsf9</i>         | 0,14 | 0,12 | 0,29 | 0,27 | 0,13 | 0,28 | 0,46 |
| <i>Rpl34</i>         | 0,14 | 0,09 | 0,30 | 0,20 | 0,12 | 0,25 | 0,46 |
| <i>Chmp6</i>         | 0,08 | 0,14 | 0,28 | 0,18 | 0,11 | 0,23 | 0,46 |
| <i>Oasl1</i>         | 0,12 | 0,16 | 0,29 | 0,31 | 0,14 | 0,30 | 0,46 |
| <i>9630028B13Rik</i> | 0,11 | 0,07 | 0,19 | 0,19 | 0,09 | 0,19 | 0,46 |
| <i>Phf1</i>          | 0,09 | 0,10 | 0,26 | 0,15 | 0,10 | 0,21 | 0,47 |
| <i>Rhbdl1</i>        | 0,16 | 0,17 | 0,36 | 0,35 | 0,17 | 0,35 | 0,47 |
| <i>Jmjd8</i>         | 0,12 | 0,15 | 0,31 | 0,27 | 0,13 | 0,29 | 0,47 |
| <i>Prdx6</i>         | 0,20 | 0,18 | 0,42 | 0,39 | 0,19 | 0,41 | 0,47 |
| <i>Mrpl9</i>         | 0,08 | 0,09 | 0,23 | 0,15 | 0,09 | 0,19 | 0,47 |
| <i>Selenbp1</i>      | 0,12 | 0,08 | 0,24 | 0,19 | 0,10 | 0,21 | 0,47 |
| <i>Tpi1</i>          | 0,21 | 0,15 | 0,45 | 0,33 | 0,18 | 0,39 | 0,47 |
| <i>Tmub2</i>         | 0,10 | 0,09 | 0,24 | 0,18 | 0,10 | 0,21 | 0,47 |

|                      |      |      |      |      |      |      |      |
|----------------------|------|------|------|------|------|------|------|
| <i>Kbtbd13</i>       | 0,09 | 0,14 | 0,25 | 0,23 | 0,11 | 0,24 | 0,47 |
| <i>Ndufa6</i>        | 0,15 | 0,15 | 0,36 | 0,29 | 0,15 | 0,32 | 0,47 |
| <i>Tmub1</i>         | 0,18 | 0,06 | 0,28 | 0,24 | 0,12 | 0,26 | 0,47 |
| <i>Mapk3</i>         | 0,19 | 0,16 | 0,39 | 0,35 | 0,17 | 0,37 | 0,47 |
| <i>Eif5a</i>         | 0,08 | 0,11 | 0,23 | 0,18 | 0,10 | 0,21 | 0,47 |
| <i>Eif5a</i>         | 0,07 | 0,11 | 0,22 | 0,16 | 0,09 | 0,19 | 0,47 |
| <i>Map3k11</i>       | 0,10 | 0,09 | 0,22 | 0,18 | 0,10 | 0,20 | 0,47 |
| <i>Pspn</i>          | 0,20 | 0,01 | 0,18 | 0,26 | 0,11 | 0,22 | 0,47 |
| <i>Irf1</i>          | 0,21 | 0,16 | 0,40 | 0,38 | 0,19 | 0,39 | 0,48 |
| <i>Inpp5j</i>        | 0,15 | 0,11 | 0,26 | 0,27 | 0,13 | 0,27 | 0,48 |
| <i>Irf1</i>          | 0,22 | 0,17 | 0,43 | 0,41 | 0,20 | 0,42 | 0,48 |
| <i>Zfp784</i>        | 0,06 | 0,13 | 0,21 | 0,20 | 0,10 | 0,20 | 0,48 |
| <i>Smim15</i>        | 0,18 | 0,15 | 0,42 | 0,28 | 0,17 | 0,35 | 0,48 |
| <i>Gmppb</i>         | 0,08 | 0,12 | 0,23 | 0,19 | 0,10 | 0,21 | 0,48 |
| <i>Adat3</i>         | 0,14 | 0,13 | 0,34 | 0,23 | 0,14 | 0,28 | 0,48 |
| <i>Snord17</i>       | 0,18 | 0,09 | 0,45 | 0,11 | 0,13 | 0,28 | 0,48 |
| <i>Bad</i>           | 0,14 | 0,09 | 0,26 | 0,21 | 0,12 | 0,24 | 0,48 |
| <i>Apoc1</i>         | 0,09 | 0,13 | 0,29 | 0,17 | 0,11 | 0,23 | 0,48 |
| <i>Sephs2</i>        | 0,31 | 0,09 | 0,47 | 0,37 | 0,20 | 0,42 | 0,48 |
| <i>Eid2b</i>         | 0,10 | 0,12 | 0,21 | 0,23 | 0,11 | 0,22 | 0,48 |
| <i>Acot8</i>         | 0,13 | 0,08 | 0,22 | 0,22 | 0,11 | 0,22 | 0,48 |
| <i>Tmem50b</i>       | 0,12 | 0,11 | 0,22 | 0,24 | 0,11 | 0,23 | 0,48 |
| <i>Ly6g6d</i>        | 0,11 | 0,11 | 0,21 | 0,26 | 0,11 | 0,24 | 0,48 |
| <i>1600029I14Rik</i> | 0,12 | 0,09 | 0,18 | 0,25 | 0,10 | 0,21 | 0,48 |
| <i>B2m</i>           | 0,17 | 0,09 | 0,31 | 0,23 | 0,13 | 0,27 | 0,48 |
| <i>Fam134b</i>       | 0,14 | 0,09 | 0,24 | 0,22 | 0,11 | 0,23 | 0,48 |
| <i>Eif6</i>          | 0,23 | 0,20 | 0,48 | 0,40 | 0,22 | 0,44 | 0,48 |
| <i>Irf1</i>          | 0,23 | 0,18 | 0,42 | 0,42 | 0,20 | 0,42 | 0,49 |
| <i>Atf5</i>          | 0,10 | 0,11 | 0,24 | 0,19 | 0,10 | 0,21 | 0,49 |
| <i>Mir3109</i>       | 0,54 | 0,29 | 1,29 | 0,43 | 0,42 | 0,86 | 0,49 |
| <i>Rabggtb</i>       | 0,09 | 0,12 | 0,22 | 0,21 | 0,11 | 0,22 | 0,49 |
| <i>Tuba4a</i>        | 0,14 | 0,15 | 0,32 | 0,28 | 0,15 | 0,30 | 0,49 |

|                      |      |      |      |      |      |      |      |
|----------------------|------|------|------|------|------|------|------|
| <i>Etfb</i>          | 0,08 | 0,11 | 0,22 | 0,19 | 0,10 | 0,20 | 0,49 |
| <i>Zbtb12</i>        | 0,33 | 0,22 | 0,63 | 0,49 | 0,28 | 0,56 | 0,49 |
| <i>Pcgf2</i>         | 0,11 | 0,08 | 0,21 | 0,19 | 0,10 | 0,20 | 0,49 |
| <i>Pcgf2</i>         | 0,12 | 0,09 | 0,21 | 0,19 | 0,10 | 0,20 | 0,49 |
| <i>Slc25a34</i>      | 0,19 | 0,20 | 0,48 | 0,31 | 0,19 | 0,40 | 0,49 |
| <i>Dhcr7</i>         | 0,11 | 0,08 | 0,20 | 0,20 | 0,10 | 0,20 | 0,49 |
| <i>Dhrs11</i>        | 0,16 | 0,09 | 0,25 | 0,27 | 0,13 | 0,26 | 0,49 |
| <i>2210417A02Rik</i> | 0,12 | 0,08 | 0,19 | 0,22 | 0,10 | 0,20 | 0,49 |
| <i>Myl12b</i>        | 0,20 | 0,21 | 0,42 | 0,41 | 0,20 | 0,41 | 0,49 |
| <i>Ap5s1</i>         | 0,12 | 0,10 | 0,30 | 0,15 | 0,11 | 0,22 | 0,49 |
| <i>Ppa1</i>          | 0,12 | 0,09 | 0,24 | 0,19 | 0,10 | 0,21 | 0,49 |
| <i>Mir3089</i>       | 0,00 | 0,24 | 0,30 | 0,19 | 0,12 | 0,24 | 0,49 |
| <i>Apoc1</i>         | 0,09 | 0,14 | 0,29 | 0,17 | 0,11 | 0,23 | 0,49 |
| <i>Agpat2</i>        | 0,12 | 0,10 | 0,26 | 0,18 | 0,11 | 0,22 | 0,49 |
| <i>Slc9a3r1</i>      | 0,20 | 0,12 | 0,33 | 0,30 | 0,16 | 0,31 | 0,49 |
| <i>Fis1</i>          | 0,10 | 0,13 | 0,24 | 0,23 | 0,12 | 0,23 | 0,49 |
| <i>Akt1s1</i>        | 0,16 | 0,07 | 0,25 | 0,21 | 0,11 | 0,23 | 0,50 |
| <i>Shisa5</i>        | 0,33 | 0,14 | 0,52 | 0,42 | 0,23 | 0,47 | 0,50 |
| <i>Carhsp1</i>       | 0,16 | 0,12 | 0,30 | 0,26 | 0,14 | 0,28 | 0,50 |
| <i>Kcnk5</i>         | 0,25 | 0,18 | 0,44 | 0,41 | 0,21 | 0,43 | 0,50 |
| <i>Chmp1a</i>        | 0,16 | 0,10 | 0,28 | 0,25 | 0,13 | 0,26 | 0,50 |
| <i>Mgst3</i>         | 0,17 | 0,15 | 0,35 | 0,28 | 0,16 | 0,32 | 0,50 |
| <i>Gm12530</i>       | 0,11 | 0,13 | 0,25 | 0,24 | 0,12 | 0,25 | 0,50 |
| <i>Slc39a7</i>       | 0,20 | 0,16 | 0,39 | 0,33 | 0,18 | 0,36 | 0,50 |
| <i>Purg</i>          | 0,13 | 0,08 | 0,22 | 0,19 | 0,10 | 0,21 | 0,50 |
| <i>Kctd17</i>        | 0,14 | 0,11 | 0,27 | 0,24 | 0,13 | 0,25 | 0,50 |
| <i>Tor1aip2</i>      | 0,10 | 0,11 | 0,22 | 0,20 | 0,10 | 0,21 | 0,50 |
| <i>Taf10</i>         | 0,12 | 0,09 | 0,23 | 0,19 | 0,11 | 0,21 | 0,50 |
| <i>Akt1s1</i>        | 0,18 | 0,08 | 0,30 | 0,24 | 0,13 | 0,27 | 0,50 |
| <i>4933404O12Rik</i> | 0,12 | 0,11 | 0,23 | 0,22 | 0,11 | 0,23 | 0,50 |
| <i>Rab3a</i>         | 0,20 | 0,11 | 0,33 | 0,29 | 0,16 | 0,31 | 0,50 |
| <i>Synpo</i>         | 0,12 | 0,09 | 0,21 | 0,21 | 0,10 | 0,21 | 0,50 |



|                  |      |      |      |      |      |      |      |
|------------------|------|------|------|------|------|------|------|
| <i>Sphk2</i>     | 0,27 | 0,16 | 0,51 | 0,36 | 0,22 | 0,43 | 0,50 |
| 2810013P06Rik    | 0,16 | 0,08 | 0,36 | 0,12 | 0,12 | 0,24 | 0,50 |
| <i>Arl1</i>      | 0,15 | 0,19 | 0,39 | 0,29 | 0,17 | 0,34 | 0,50 |
| <i>Tor4a</i>     | 0,12 | 0,15 | 0,32 | 0,21 | 0,13 | 0,26 | 0,50 |
| <i>Batf2</i>     | 0,12 | 0,14 | 0,28 | 0,23 | 0,13 | 0,26 | 0,50 |
| <i>Il22ra1</i>   | 0,15 | 0,17 | 0,35 | 0,29 | 0,16 | 0,32 | 0,50 |
| <i>Prr13</i>     | 0,25 | 0,13 | 0,39 | 0,36 | 0,19 | 0,37 | 0,50 |
| <i>Mir135a-1</i> | 0,27 | 0,33 | 0,15 | 0,14 | 0,30 | 0,15 | 2,05 |
| <i>Ly6d</i>      | 0,29 | 0,26 | 0,11 | 0,16 | 0,28 | 0,13 | 2,11 |
| 1700028B04Rik    | 0,43 | 0,17 | 0,13 | 0,15 | 0,30 | 0,14 | 2,15 |
| <i>Mir190b</i>   | 0,54 | 0,00 | 0,20 | 0,05 | 0,27 | 0,12 | 2,17 |
| <i>Ly6g5b</i>    | 0,34 | 0,09 | 0,06 | 0,14 | 0,21 | 0,10 | 2,21 |
| <i>Snora47</i>   | 0,68 | 0,23 | 0,21 | 0,20 | 0,46 | 0,20 | 2,24 |
| <i>Snord42a</i>  | 0,27 | 0,18 | 0,11 | 0,09 | 0,23 | 0,10 | 2,25 |
| 5830454E08Rik    | 0,34 | 0,02 | 0,08 | 0,07 | 0,18 | 0,08 | 2,28 |
| <i>Sapcd1</i>    | 0,32 | 0,10 | 0,06 | 0,12 | 0,21 | 0,09 | 2,32 |
| <i>Rnu73b</i>    | 0,27 | 0,21 | 0,17 | 0,04 | 0,24 | 0,10 | 2,34 |
| BC033916         | 0,25 | 0,13 | 0,03 | 0,13 | 0,19 | 0,08 | 2,34 |
| <i>Csf3</i>      | 0,30 | 0,05 | 0,08 | 0,07 | 0,18 | 0,07 | 2,39 |
| 1700092M07Rik    | 0,63 | 0,21 | 0,16 | 0,19 | 0,42 | 0,17 | 2,41 |
| <i>Mir32</i>     | 0,54 | 0,36 | 0,20 | 0,18 | 0,45 | 0,19 | 2,42 |
| <i>Npvf</i>      | 0,25 | 0,14 | 0,07 | 0,09 | 0,19 | 0,08 | 2,42 |
| <i>Mir196a-1</i> | 0,45 | 0,10 | 0,19 | 0,04 | 0,28 | 0,11 | 2,49 |
| <i>Mir148b</i>   | 0,68 | 0,03 | 0,19 | 0,09 | 0,36 | 0,14 | 2,53 |
| BC002163         | 0,31 | 0,04 | 0,09 | 0,05 | 0,18 | 0,07 | 2,53 |
| <i>Mir497</i>    | 0,45 | 0,05 | 0,02 | 0,18 | 0,25 | 0,10 | 2,57 |
| <i>Zg16</i>      | 0,41 | 0,06 | 0,09 | 0,09 | 0,24 | 0,09 | 2,62 |
| <i>Fabp4</i>     | 0,18 | 0,15 | 0,05 | 0,07 | 0,17 | 0,06 | 2,66 |
| <i>Oxld1</i>     | 0,38 | 0,18 | 0,09 | 0,12 | 0,28 | 0,10 | 2,76 |
| <i>Snord92</i>   | 0,59 | 0,21 | 0,13 | 0,15 | 0,40 | 0,14 | 2,79 |
| <i>Mir1967</i>   | 0,27 | 0,05 | 0,02 | 0,09 | 0,16 | 0,06 | 2,85 |
| <i>Mir1940</i>   | 0,45 | 0,31 | 0,11 | 0,15 | 0,38 | 0,13 | 2,86 |

|                      |      |      |      |      |      |      |       |
|----------------------|------|------|------|------|------|------|-------|
| <i>Calm4</i>         | 0,26 | 0,07 | 0,04 | 0,08 | 0,17 | 0,06 | 2,91  |
| <i>Mir93</i>         | 0,36 | 0,12 | 0,07 | 0,07 | 0,24 | 0,07 | 3,30  |
| <i>Mir449a</i>       | 0,27 | 0,05 | 0,00 | 0,09 | 0,16 | 0,05 | 3,41  |
| <i>Mir181a-1</i>     | 0,09 | 0,28 | 0,00 | 0,11 | 0,18 | 0,05 | 3,44  |
| <i>Mir3100</i>       | 1,63 | 0,00 | 0,11 | 0,35 | 0,81 | 0,23 | 3,48  |
| <i>Mir22</i>         | 0,00 | 0,29 | 0,02 | 0,06 | 0,15 | 0,04 | 3,77  |
| <i>Scarna3b</i>      | 0,54 | 0,00 | 0,03 | 0,12 | 0,27 | 0,07 | 3,78  |
| <i>Olfr208</i>       | 0,24 | 0,11 | 0,04 | 0,05 | 0,17 | 0,04 | 3,90  |
| <i>Mir181c</i>       | 0,27 | 0,00 | 0,06 | 0,01 | 0,14 | 0,03 | 3,98  |
| <i>Mir3072</i>       | 0,54 | 0,09 | 0,11 | 0,04 | 0,31 | 0,07 | 4,25  |
| <i>Snord73a</i>      | 0,27 | 0,00 | 0,03 | 0,04 | 0,14 | 0,03 | 4,26  |
| <i>Spag11a</i>       | 0,25 | 0,13 | 0,01 | 0,07 | 0,19 | 0,04 | 4,31  |
| <i>Rasd1</i>         | 0,24 | 0,06 | 0,04 | 0,02 | 0,15 | 0,03 | 4,58  |
| <i>Mir16-2</i>       | 0,99 | 0,31 | 0,07 | 0,20 | 0,65 | 0,14 | 4,73  |
| <i>Snord64</i>       | 0,27 | 0,00 | 0,06 | 0,00 | 0,14 | 0,03 | 4,82  |
| <i>Mir1843</i>       | 0,54 | 0,00 | 0,00 | 0,11 | 0,27 | 0,05 | 5,09  |
| <i>Prps1l1</i>       | 0,22 | 0,08 | 0,02 | 0,04 | 0,15 | 0,03 | 5,16  |
| <i>Olfr282</i>       | 0,26 | 0,05 | 0,03 | 0,03 | 0,15 | 0,03 | 5,21  |
| <i>C920025E04Rik</i> | 0,22 | 0,04 | 0,02 | 0,03 | 0,13 | 0,02 | 5,32  |
| <i>Mir145</i>        | 0,41 | 0,26 | 0,00 | 0,12 | 0,33 | 0,06 | 5,36  |
| <i>Mir330</i>        | 0,54 | 0,00 | 0,00 | 0,09 | 0,27 | 0,05 | 5,73  |
| <i>Mir759</i>        | 0,54 | 0,00 | 0,04 | 0,05 | 0,27 | 0,04 | 6,39  |
| <i>Mir675</i>        | 0,18 | 0,16 | 0,00 | 0,05 | 0,17 | 0,02 | 7,10  |
| <i>Dear1</i>         | 0,19 | 0,04 | 0,00 | 0,03 | 0,12 | 0,02 | 7,11  |
| <i>Mir335</i>        | 0,27 | 0,16 | 0,00 | 0,06 | 0,21 | 0,03 | 7,21  |
| <i>Mir877</i>        | 0,54 | 0,00 | 0,07 | 0,00 | 0,27 | 0,04 | 7,23  |
| <i>Mir148a</i>       | 0,90 | 0,26 | 0,13 | 0,02 | 0,58 | 0,08 | 7,51  |
| <i>Snord116l1</i>    | 0,54 | 0,03 | 0,00 | 0,07 | 0,29 | 0,04 | 8,13  |
| <i>Ear5</i>          | 0,16 | 0,11 | 0,01 | 0,03 | 0,13 | 0,02 | 8,29  |
| <i>Calm5</i>         | 0,20 | 0,07 | 0,02 | 0,01 | 0,13 | 0,01 | 9,05  |
| <i>Snord45b</i>      | 0,27 | 0,05 | 0,00 | 0,04 | 0,16 | 0,02 | 9,10  |
| <i>Krtap8-1</i>      | 0,18 | 0,04 | 0,00 | 0,02 | 0,11 | 0,01 | 11,73 |

|                  |      |      |      |      |      |      |       |
|------------------|------|------|------|------|------|------|-------|
| <i>Olfr1324</i>  | 0,22 | 0,05 | 0,01 | 0,02 | 0,13 | 0,01 | 11,73 |
| <i>Ube2dn1</i>   | 0,20 | 0,05 | 0,00 | 0,02 | 0,13 | 0,01 | 12,31 |
| <i>Olfr1413</i>  | 0,20 | 0,01 | 0,00 | 0,02 | 0,11 | 0,01 | 14,34 |
| <i>Mir466</i>    | 0,27 | 0,00 | 0,00 | 0,02 | 0,14 | 0,01 | 15,26 |
| <i>Mir1936</i>   | 0,27 | 0,02 | 0,02 | 0,00 | 0,14 | 0,01 | 15,38 |
| <i>Olfr1509</i>  | 0,22 | 0,09 | 0,00 | 0,02 | 0,15 | 0,01 | 16,14 |
| <i>Mir345</i>    | 0,18 | 0,03 | 0,00 | 0,01 | 0,11 | 0,01 | 18,17 |
| <i>Olfr1048</i>  | 0,16 | 0,05 | 0,00 | 0,01 | 0,11 | 0,00 | 29,89 |
| <i>Cypt8</i>     | 0,41 | 0,02 | 0,01 | 0,00 | 0,21 | 0,01 | 36,33 |
| <i>Bhlha9</i>    | 0,16 | 0,06 | 0,00 | 0,01 | 0,11 | 0,00 | 37,96 |
| <i>Cypt1</i>     | 0,40 | 0,01 | 0,01 | 0,00 | 0,21 | 0,01 | 38,74 |
| <i>Hist1h3i</i>  | 0,21 | 0,02 | 0,00 | 0,01 | 0,11 | 0,00 | 41,07 |
| <i>Vmn1r28</i>   | 0,25 | 0,02 | 0,00 | 0,01 | 0,13 | 0,00 | 42,98 |
| <i>Mir122a</i>   | 0,81 | 0,13 | 0,00 | 0,00 | 0,47 | 0,00 | inf   |
| <i>Mir1955</i>   | 0,81 | 0,10 | 0,00 | 0,00 | 0,46 | 0,00 | inf   |
| <i>Mir378b</i>   | 0,45 | 0,28 | 0,00 | 0,00 | 0,36 | 0,00 | inf   |
| <i>Mir3108</i>   | 0,54 | 0,05 | 0,00 | 0,00 | 0,30 | 0,00 | inf   |
| <i>Snora19</i>   | 0,54 | 0,00 | 0,00 | 0,00 | 0,27 | 0,00 | inf   |
| <i>Mir200c</i>   | 0,27 | 0,10 | 0,00 | 0,00 | 0,19 | 0,00 | inf   |
| <i>Mir1942</i>   | 0,00 | 0,36 | 0,00 | 0,00 | 0,18 | 0,00 | inf   |
| <i>Dpm3</i>      | 0,27 | 0,06 | 0,00 | 0,00 | 0,17 | 0,00 | inf   |
| <i>Mir202</i>    | 0,27 | 0,05 | 0,00 | 0,00 | 0,16 | 0,00 | inf   |
| <i>H2afb1</i>    | 0,21 | 0,08 | 0,00 | 0,00 | 0,15 | 0,00 | inf   |
| <i>Olfr948</i>   | 0,23 | 0,05 | 0,00 | 0,00 | 0,14 | 0,00 | inf   |
| <i>Mir741</i>    | 0,27 | 0,00 | 0,00 | 0,00 | 0,14 | 0,00 | inf   |
| <i>Mir1938</i>   | 0,27 | 0,00 | 0,00 | 0,00 | 0,14 | 0,00 | inf   |
| <i>Snord2</i>    | 0,27 | 0,00 | 0,00 | 0,00 | 0,14 | 0,00 | inf   |
| <i>Mir125b-2</i> | 0,27 | 0,00 | 0,00 | 0,00 | 0,14 | 0,00 | inf   |
| <i>Mir133a-1</i> | 0,27 | 0,00 | 0,00 | 0,00 | 0,14 | 0,00 | inf   |
| <i>Mir684-1</i>  | 0,27 | 0,00 | 0,00 | 0,00 | 0,14 | 0,00 | inf   |
| <i>Mir137</i>    | 0,27 | 0,00 | 0,00 | 0,00 | 0,14 | 0,00 | inf   |
| <i>Mir127</i>    | 0,00 | 0,26 | 0,00 | 0,00 | 0,13 | 0,00 | inf   |

|  |                 |  |      |  |      |  |      |  |      |  |      |  |      |  |     |  |
|--|-----------------|--|------|--|------|--|------|--|------|--|------|--|------|--|-----|--|
|  | <i>Olfr1049</i> |  | 0,19 |  | 0,03 |  | 0,00 |  | 0,00 |  | 0,11 |  | 0,00 |  | inf |  |
|--|-----------------|--|------|--|------|--|------|--|------|--|------|--|------|--|-----|--|

**Table III**

MiRs found in mice or in SY5Y cells, related to Fig. 4a

| <b>miRs-mice</b>  | <b>miRs-SY5Y</b> |
|-------------------|------------------|
| <i>miRLET7G</i>   | <i>miR1-2</i>    |
| <i>miRLET7D</i>   | <i>miR101-2</i>  |
| <i>miRLET7C-2</i> | <i>miR103A1</i>  |
| <i>miR93</i>      | <i>miR103A2</i>  |
| <i>miR92-1</i>    | <i>miR103B1</i>  |
| <i>miR877</i>     | <i>miR103B2</i>  |
| <i>miR763</i>     | <i>miR105-2</i>  |
| <i>miR761</i>     | <i>miR106A</i>   |
| <i>miR759</i>     | <i>miR1178</i>   |
| <i>miR741</i>     | <i>miR1179</i>   |
| <i>miR706</i>     | <i>miR1193</i>   |
| <i>miR704</i>     | <i>miR1197</i>   |
| <i>miR700</i>     | <i>miR1200</i>   |
| <i>miR7-2</i>     | <i>miR1203</i>   |
| <i>miR684-1</i>   | <i>miR1205</i>   |
| <i>miR677</i>     | <i>miR1206</i>   |
| <i>miR675</i>     | <i>miR122</i>    |
| <i>miR540</i>     | <i>miR1224</i>   |
| <i>miR532</i>     | <i>miR1228</i>   |
| <i>miR511</i>     | <i>miR1231</i>   |
| <i>miR505</i>     | <i>miR1234</i>   |
| <i>miR497</i>     | <i>miR1236</i>   |
| <i>miR488</i>     | <i>miR1238</i>   |
| <i>miR468</i>     | <i>miR124-1</i>  |
| <i>miR466</i>     | <i>miR124-3</i>  |
| <i>miR449A</i>    | <i>miR1243</i>   |
| <i>miR434</i>     | <i>miR1244-1</i> |
| <i>miR429</i>     | <i>miR1244-1</i> |
| <i>miR3968</i>    | <i>miR1244-1</i> |
| <i>miR378B</i>    | <i>miR1247</i>   |
| <i>miR345</i>     | <i>miR1252</i>   |
| <i>miR340</i>     | <i>miR1253</i>   |
| <i>miR335</i>     | <i>miR1257</i>   |
| <i>miR330</i>     | <i>miR1258</i>   |
| <i>miR33</i>      | <i>miR125A</i>   |
| <i>miR326</i>     | <i>miR125B1</i>  |
| <i>miR322</i>     | <i>miR126</i>    |
| <i>miR32</i>      | <i>miR1260B</i>  |
| <i>miR3109</i>    | <i>miR1262</i>   |
| <i>miR3108</i>    | <i>miR1264</i>   |
| <i>miR3103</i>    | <i>miR1265</i>   |
| <i>miR3100</i>    | <i>miR127</i>    |
| <i>miR31</i>      | <i>miR1270-1</i> |

|                  |                  |
|------------------|------------------|
| <i>miR30A</i>    | <i>miR1275</i>   |
| <i>miR3095</i>   | <i>miR1276</i>   |
| <i>miR3089</i>   | <i>miR1278</i>   |
| <i>miR3076</i>   | <i>miR1282</i>   |
| <i>miR3075</i>   | <i>miR1283-1</i> |
| <i>miR3072</i>   | <i>miR1283-2</i> |
| <i>miR3069</i>   | <i>miR1287</i>   |
| <i>miR3063</i>   | <i>miR1289-2</i> |
| <i>miR3061</i>   | <i>miR129-2</i>  |
| <i>miR3058</i>   | <i>miR1291</i>   |
| <i>miR29C</i>    | <i>miR1292</i>   |
| <i>miR26B</i>    | <i>miR1297</i>   |
| <i>miR26A-2</i>  | <i>miR1301</i>   |
| <i>miR26A-1</i>  | <i>miR1304</i>   |
| <i>miR22</i>     | <i>miR1305</i>   |
| <i>miR20A</i>    | <i>miR1306</i>   |
| <i>miR205</i>    | <i>miR130A</i>   |
| <i>miR202</i>    | <i>miR130B</i>   |
| <i>miR200C</i>   | <i>miR1322</i>   |
| <i>miR1982</i>   | <i>miR1323</i>   |
| <i>miR1981</i>   | <i>miR1324</i>   |
| <i>miR196A-1</i> | <i>miR133A1</i>  |
| <i>miR1967</i>   | <i>miR133A2</i>  |
| <i>miR1961</i>   | <i>miR134</i>    |
| <i>miR1955</i>   | <i>miR135A1</i>  |
| <i>miR1942</i>   | <i>miR136</i>    |
| <i>miR1940</i>   | <i>miR137</i>    |
| <i>miR193B</i>   | <i>miR138-1</i>  |
| <i>miR1938</i>   | <i>miR138-2</i>  |
| <i>miR1936</i>   | <i>miR139</i>    |
| <i>miR1930</i>   | <i>miR144</i>    |
| <i>miR1929</i>   | <i>miR145</i>    |
| <i>miR191</i>    | <i>miR1468</i>   |
| <i>miR190B</i>   | <i>miR1469</i>   |
| <i>miR1904</i>   | <i>miR146A</i>   |
| <i>miR1843</i>   | <i>miR146B</i>   |
| <i>miR1839</i>   | <i>miR147A</i>   |
| <i>miR181C</i>   | <i>miR148A</i>   |
| <i>miR181A-1</i> | <i>miR148B</i>   |
| <i>miR16-2</i>   | <i>miR149</i>    |
| <i>miR15A</i>    | <i>miR152</i>    |
| <i>miR148B</i>   | <i>miR153-1</i>  |
| <i>miR148A</i>   | <i>miR1538</i>   |
| <i>miR147</i>    | <i>miR1539</i>   |
| <i>miR145</i>    | <i>miR155</i>    |
| <i>miR139</i>    | <i>miR15A</i>    |

*miR137*  
*miR135A-1*  
*miR133A-1*  
*miR127*  
*miR125B-2*  
*miR1247*  
*miR122A*  
*miR1192*  
*miR1190*  
*miR10A*  
*miR106A*  
*miR103-1*

*miR15B*  
*miR17*  
*miR181A2*  
*miR181B1*  
*miR181B2*  
*miR181C*  
*miR181D*  
*miR182*  
*miR1827*  
*miR183*  
*miR184*  
*miR188*  
*miR18A*  
*miR190A*  
*miR190B*  
*miR191*  
*miR1910*  
*miR1911*  
*miR1912*  
*miR1914*  
*miR193A*  
*miR193B*  
*miR194-1*  
*miR195*  
*miR196A1*  
*miR196B*  
*miR1973*  
*miR1976*  
*miR199A2*  
*miR199B*  
*miR19B1*  
*miR19B2*  
*miR200A*  
*miR200B*  
*miR202*  
*miR203*  
*miR204*  
*miR208B*  
*miR20B*  
*miR21*  
*miR210*  
*miR211*  
*miR2110*  
*miR2113*  
*miR2116*  
*miR2117*

*miR216B*  
*miR217*  
*miR218-2*  
*miR219-1*  
*miR219-2*  
*miR22*  
*miR221*  
*miR222*  
*miR223*  
*miR224*  
*miR2276*  
*miR2278*  
*miR2392*  
*miR23B*  
*miR24-2*  
*miR2682*  
*miR26A2*  
*miR27B*  
*miR2861*  
*miR2909*  
*miR296*  
*miR2964A*  
*miR29A*  
*miR29B1*  
*miR302B*  
*miR302D*  
*miR3064*  
*miR3065*  
*miR30A*  
*miR30B*  
*miR30C1*  
*miR30E*  
*miR31*  
*miR3115*  
*miR3117*  
*miR3119-2*  
*miR3122*  
*miR3126*  
*miR3127*  
*miR3128*  
*miR3129*  
*miR3130-2*  
*miR3136*  
*miR3139*  
*miR3141*  
*miR3142*



*miR3146*  
*miR3148*  
*miR3150A*  
*miR3150B*  
*miR3153*  
*miR3158-2*  
*miR3160-1*  
*miR3160-2*  
*miR3162*  
*miR3163*  
*miR3165*  
*miR3167*  
*miR3169*  
*miR3173*  
*miR3175*  
*miR3178*  
*miR3183*  
*miR3184*  
*miR3186*  
*miR3187*  
*miR3188*  
*miR3189*  
*miR3192*  
*miR3194*  
*miR3196*  
*miR3197*  
*miR3198-1*  
*miR3199-1*  
*miR3199-2*  
*miR3201*  
*miR320C1*  
*miR323A*  
*miR323B*  
*miR324*  
*miR326*  
*miR328*  
*miR329-1*  
*miR329-2*  
*miR330*  
*miR331*  
*miR335*  
*miR337*  
*miR338*  
*miR339*  
*miR342*  
*miR34B*

*miR34C*  
*miR3529*  
*miR3545*  
*miR3591*  
*miR3605*  
*miR3610*  
*miR3613*  
*miR3615*  
*miR3618*  
*miR362*  
*miR3620*  
*miR363*  
*miR3646*  
*miR3650*  
*miR3652*  
*miR3654*  
*miR3655*  
*miR3658*  
*miR3659*  
*miR365A*  
*miR3663*  
*miR3664*  
*miR3666*  
*miR3668*  
*miR367*  
*miR3671*  
*miR3675*  
*miR3675*  
*miR3679*  
*miR3684*  
*miR3689A*  
*miR3689D2*  
*miR3689E*  
*miR369*  
*miR3691*  
*miR3692*  
*miR3714*  
*miR371A*  
*miR371B*  
*miR373*  
*miR374A*  
*miR376A1*  
*miR376A2*  
*miR376C*  
*miR377*  
*miR378C*

*miR378D2*  
*miR378F*  
*miR380*  
*miR381*  
*miR382*  
*miR3909*  
*miR3910-1*  
*miR3910-2*  
*miR3912*  
*miR3913-1*  
*miR3913-2*  
*miR3914-1*  
*miR3914-2*  
*miR3916*  
*miR3917*  
*miR3919*  
*miR3921*  
*miR3924*  
*miR3925*  
*miR3936*  
*miR3938*  
*miR3939*  
*miR3940*  
*miR3942*  
*miR3943*  
*miR3945*  
*miR3960*  
*miR3973*  
*miR3976*  
*miR411*  
*miR412*  
*miR423*  
*miR4251*  
*miR4255*  
*miR4257*  
*miR4258*  
*miR4260*  
*miR4261*  
*miR4262*  
*miR4263*  
*miR4264*  
*miR4265*  
*miR4267*  
*miR4268*  
*miR4269*  
*miR4270*

*miR4273*  
*miR4275*  
*miR4276*  
*miR4277*  
*miR4280*  
*miR4281*  
*miR4284*  
*miR4285*  
*miR4286*  
*miR4287*  
*miR4288*  
*miR4290*  
*miR4292*  
*miR4294*  
*miR4296*  
*miR4297*  
*miR4298*  
*miR4299*  
*miR4302*  
*miR4305*  
*miR4307*  
*miR4308*  
*miR4309*  
*miR431*  
*miR4312*  
*miR4315-1*  
*miR4316*  
*miR432*  
*miR4320*  
*miR4322*  
*miR4324*  
*miR4325*  
*miR4329*  
*miR433*  
*miR4417*  
*miR4420*  
*miR4423*  
*miR4424*  
*miR4429*  
*miR4432*  
*miR4436A*  
*miR4436B1*  
*miR4442*  
*miR4443*  
*miR4444-1*  
*miR4446*

*miR4456*  
*miR4457*  
*miR4460*  
*miR4464*  
*miR4467*  
*miR4468*  
*miR4470*  
*miR4472-1*  
*miR4476*  
*miR4478*  
*miR448*  
*miR4480*  
*miR4482-1*  
*miR4483*  
*miR4484*  
*miR4486*  
*miR4488*  
*miR4490*  
*miR4491*  
*miR4492*  
*miR4493*  
*miR4499*  
*miR449A*  
*miR449C*  
*miR4500*  
*miR4503*  
*miR4508*  
*miR450A1*  
*miR450A2*  
*miR4513*  
*miR4514*  
*miR4515*  
*miR4518*  
*miR4519*  
*miR451A*  
*miR451B*  
*miR452*  
*miR4521*  
*miR4526*  
*miR4529*  
*miR4530*  
*miR4531*  
*miR4536-1*  
*miR4540*  
*miR455*  
*miR4632*

*miR4633*  
*miR4636*  
*miR4637*  
*miR4639*  
*miR4640*  
*miR4642*  
*miR4644*  
*miR4645*  
*miR4647*  
*miR4648*  
*miR4650-1*  
*miR4652*  
*miR4654*  
*miR4656*  
*miR4657*  
*miR4658*  
*miR4660*  
*miR4661*  
*miR4666A*  
*miR4667*  
*miR4668*  
*miR4669*  
*miR4670*  
*miR4671*  
*miR4672*  
*miR4673*  
*miR4674*  
*miR4677*  
*miR4679-1*  
*miR4679-2*  
*miR4681*  
*miR4682*  
*miR4683*  
*miR4684*  
*miR4685*  
*miR4686*  
*miR4688*  
*miR4689*  
*miR4691*  
*miR4693*  
*miR4694*  
*miR4695*  
*miR4700*  
*miR4704*  
*miR4705*  
*miR4707*

*miR4708*  
*miR4709*  
*miR4710*  
*miR4711*  
*miR4714*  
*miR4716*  
*miR4718*  
*miR4719*  
*miR4721*  
*miR4723*  
*miR4724*  
*miR4725*  
*miR4726*  
*miR4727*  
*miR4728*  
*miR4731*  
*miR4732*  
*miR4733*  
*miR4735*  
*miR4736*  
*miR4737*  
*miR4738*  
*miR4741*  
*miR4742*  
*miR4745*  
*miR4748*  
*miR4750*  
*miR4751*  
*miR4753*  
*miR4757*  
*miR4758*  
*miR4759*  
*miR4761*  
*miR4763*  
*miR4764*  
*miR4767*  
*miR4771-2*  
*miR4773-2*  
*miR4775*  
*miR4778*  
*miR4779*  
*miR4782*  
*miR4784*  
*miR4786*  
*miR4787*  
*miR4788*

*miR4790*  
*miR4793*  
*miR4796*  
*miR4797*  
*miR4798*  
*miR4799*  
*miR4800*  
*miR4802*  
*miR4804*  
*miR483*  
*miR484*  
*miR486*  
*miR487A*  
*miR487B*  
*miR488*  
*miR489*  
*miR490*  
*miR491*  
*miR493*  
*miR495*  
*miR497*  
*miR498*  
*miR4999*  
*miR5000*  
*miR5001*  
*miR5004*  
*miR5008*  
*miR5011*  
*miR502*  
*miR503*  
*miR504*  
*miR5047*  
*miR506*  
*miR507*  
*miR508*  
*miR5087*  
*miR5088*  
*miR5089*  
*miR509-3*  
*miR5090*  
*miR5094*  
*miR510*  
*miR5100*  
*miR511-1*  
*miR515-2*  
*miR516A1*



*miR516A2*  
*miR516B1*  
*miR517C*  
*miR5186*  
*miR5187*  
*miR5189*  
*miR518A1*  
*miR518E*  
*miR518F*  
*miR5190*  
*miR5191*  
*miR5192*  
*miR5193*  
*miR5194*  
*miR5197*  
*miR519B*  
*miR519C*  
*miR519D*  
*miR519E*  
*miR520C*  
*miR520E*  
*miR520F*  
*miR521-1*  
*miR521-2*  
*miR523*  
*miR524*  
*miR526A1*  
*miR526A2*  
*miR527*  
*miR532*  
*miR542*  
*miR543*  
*miR548A1*  
*miR548AA2*  
*miR548AD*  
*miR548AR*  
*miR548AR*  
*miR548AR*  
*miR548AR*  
*miR548AV*  
*miR548F2*  
*miR548F4*  
*miR548G*  
*miR548J*  
*miR548K*  
*miR548U*  
*miR548X2*

*miR549*  
*miR550A1*  
*miR550A2*  
*miR551A*  
*miR551B*  
*miR553*  
*miR554*  
*miR555*  
*miR556*  
*miR557*  
*miR5579*  
*miR558*  
*miR5582*  
*miR5584*  
*miR561*  
*miR563*  
*miR567*  
*miR568*  
*miR5687*  
*miR5688*  
*miR5690*  
*miR5691*  
*miR5692C2*  
*miR5699*  
*miR570*  
*miR5700*  
*miR5702*  
*miR5703*  
*miR5704*  
*miR5707*  
*miR5708*  
*miR574*  
*miR578*  
*miR580*  
*miR583*  
*miR586*  
*miR589*  
*miR590*  
*miR592*  
*miR593*  
*miR597*  
*miR599*  
*miR601*  
*miR602*  
*miR603*  
*miR605*

*miR608*  
*miR612*  
*miR613*  
*miR615*  
*miR617*  
*miR621*  
*miR623*  
*miR624*  
*miR627*  
*miR628*  
*miR629*  
*miR632*  
*miR635*  
*miR636*  
*miR638*  
*miR639*  
*miR643*  
*miR644A*  
*miR644B*  
*miR645*  
*miR646*  
*miR647*  
*miR650*  
*miR651*  
*miR654*  
*miR655*  
*miR656*  
*miR657*  
*miR660*  
*miR661*  
*miR662*  
*miR664*  
*miR665*  
*miR668*  
*miR670*  
*miR671*  
*miR675*  
*miR7-2*  
*miR7-3*  
*miR711*  
*miR758*  
*miR760*  
*miR765*  
*miR766*  
*miR770*  
*miR875*

*miR877*  
*miR885*  
*miR888*  
*miR889*  
*miR890*  
*miR891A*  
*miR891B*  
*miR892B*  
*miR9-2*  
*miR921*  
*miR92B*  
*miR935*  
*miR937*  
*miR940*  
*miR941-1*  
*miR941-2*  
*miR941-2*  
*miR941-2*  
*miR941-3*  
*miR941-3*  
*miR941-4*  
*miR941-4*  
*miR942*  
*miR943*  
*miR944*  
*miR96*  
*miR98*  
*miRLET7A2*  
*miRLET7B*  
*miRLET7C*  
*miRLET7D*  
*miRLET7E*  
*miRLET7F1*  
*miRLET7G*

**Table IV**

MiRWalk Predicted mRNAs found in mice or in SY5Y cells, as well as common mRNAs found in mice and in SY5Y cells, related to Fig. 4b

| Predicted mRNAs in mice | Predicted mRNAs in SY5Y | Common mRNAs |
|-------------------------|-------------------------|--------------|
| AACS                    | ABAT                    | ABCB9        |
| AANAT                   | ABCA12                  | ABHD6        |
| ABCA15                  | ABCB7                   | ACADS        |
| ABCA3                   | ABCB8                   | ACP2         |
| ABCA9                   | ABCB9                   | ACTR1A       |
| ABCB6                   | ABCC10                  | ACVR1        |
| ABCB9                   | ABCC11                  | ACVR2A       |
| ABCC1                   | ABCD1                   | ADCK4        |
| ABCC8                   | ABCD3                   | AFAP1        |
| ABCC9                   | ABCG5                   | AGBL5        |
| ABCD4                   | ABHD12                  | AHDC1        |
| ABHD14A                 | ABHD14B                 | AJAP1        |
| ABHD6                   | ABHD6                   | AKR1D1       |
| ABL1                    | ABI2                    | ALCAM        |
| ABL2                    | ABI3                    | ALDH2        |
| ABLIM3                  | ACACA                   | ALDH8A1      |
| ACAA2                   | ACAD10                  | ALDOA        |
| ACADS                   | ACAD9                   | ALOX5        |
| ACOT8                   | ACADL                   | ANAPC13      |
| ACP2                    | ACADS                   | ANAPC2       |
| ACP5                    | ACBD6                   | ANKRA2       |
| ACP6                    | ACP2                    | AP3B1        |
| ACSL4                   | ACSBG1                  | AP4E1        |
| ACSM5                   | ACSBG2                  | AQP11        |
| ACTC1                   | ACSF3                   | AR           |
| ACTR1A                  | ACTA1                   | ARFGAP2      |
| ACTR5                   | ACTL7A                  | ARFIP2       |
| ACVR1                   | ACTR1A                  | ARHGDI1      |
| ACVR1B                  | ACVR1                   | ARID4A       |
| ACVR2A                  | ACVR2A                  | ARID4B       |
| ACY1                    | ADA                     | ARL11        |
| ADAM10                  | ADAM19                  | ARL2         |
| ADAM11                  | ADAM20                  | ARL6IP6      |
| ADAM12                  | ADAM22                  | ARL8B        |
| ADAM15                  | ADAM30                  | ARMCX2       |
| ADAM1B                  | ADAM9                   | ARPC5        |
| ADAM2                   | ADAMTS8                 | ARRB1        |
| ADAM6                   | ADAMTSL1                | ASB1         |
| ADAMTS1                 | ADCK1                   | ASB3         |
| ADAMTS10                | ADCK2                   | ASH1L        |
| ADAMTS19                | ADCK4                   | ASH2L        |

|           |         |         |
|-----------|---------|---------|
| ADAMTS4   | ADCY6   | ATG12   |
| ADAMTSL2  | ADCY7   | ATG4B   |
| ADAR      | ADH1A   | ATG9A   |
| ADCK4     | ADH1B   | ATP8A1  |
| ADCY3     | ADH1C   | ATXN2   |
| ADCY5     | ADNP2   | ATXN7L2 |
| ADCYAP1R1 | ADO     | B3GNT7  |
| ADFP      | ADORA1  | B3GNTL1 |
| ADI1      | ADORA2A | BAG3    |
| ADIPOQ    | ADRB2   | BATF3   |
| ADORA2B   | ADRBK1  | BBC3    |
| ADRA1D    | ADRBK2  | BCL2    |
| ADRA2B    | AFAP1   | BCL9L   |
| AF529169  | AFF4    | BECN1   |
| AFAP1     | AGBL2   | BGN     |
| AGBL5     | AGBL5   | BIRC5   |
| AGPAT6    | AGK     | BRI3    |
| AHDC1     | AGTPBP1 | BRSK2   |
| AHNAK     | AGTR1   | BTG2    |
| AHSA2     | AGTRL1  | C1QTNF5 |
| AHSG      | AGXT2L1 | C1QTNF7 |
| AI118078  | AHDC1   | CABLES2 |
| AI428936  | AHNAK2  | CADPS   |
| AI429214  | AHR     | CALM1   |
| AIFM2     | AIPL1   | CAMK2B  |
| AIFM3     | AJAP1   | CANT1   |
| AJAP1     | AKAP13  | CARS    |
| AKAP14    | AKR1B1  | CBFB    |
| AKAP6     | AKR1D1  | CBY1    |
| AKAP8     | ALCAM   | CCDC120 |
| AKAP9     | ALDH2   | CCDC28A |
| AKR1A4    | ALDH8A1 | CCDC46  |
| AKR1B7    | ALDOA   | CCDC88C |
| AKR1D1    | ALDOC   | CCDC96  |
| AKT1      | ALG10   | CCM2    |
| AKT2      | ALG2    | CCND2   |
| ALCAM     | ALG6    | CCNE1   |
| ALDH2     | ALKBH3  | CCNE2   |
| ALDH8A1   | ALOX12  | CCNJL   |
| ALDH9A1   | ALOX5   | CD40    |
| ALDOA     | ALPI    | CD48    |
| ALG12     | ALPP    | CD8A    |
| ALOX12B   | ALPPL2  | CD93    |
| ALOX5     | ALX3    | CD97    |
| ALS2CR12  | AMZ1    | CDC37   |
| AMACR     | ANAPC11 | CDC37L1 |

|          |           |           |
|----------|-----------|-----------|
| AMIGO3   | ANAPC13   | CDK8      |
| AMOTL1   | ANAPC2    | CELSR3    |
| AMPH     | ANGEL1    | CHD9      |
| ANAPC1   | ANGPT2    | CHEK1     |
| ANAPC10  | ANK2      | CHGA      |
| ANAPC13  | ANKHD1    | CHIA      |
| ANAPC2   | ANKRA2    | CHMP1A    |
| ANKMY1   | ANKRD12   | CHMP7     |
| ANKRA2   | ANKRD23   | CHORDC1   |
| ANKRD26  | ANKRD29   | CIB2      |
| ANKRD34B | ANKRD39   | CIDEB     |
| ANKRD34C | ANKRD43   | CLDN1     |
| ANKRD40  | ANKRD45   | CLDN2     |
| ANKRD49  | ANKRD53   | CLN8      |
| ANKRD58  | ANKRD55   | CLOCK     |
| ANKRD7   | ANKS4B    | CLRN1     |
| ANKS3    | ANKS6     | CNN1      |
| AOX3     | ANTXR2    | CNOT6     |
| AP1S3    | ANXA13    | CNP       |
| AP2A2    | ANXA4     | CNTN2     |
| AP3B1    | ANXA6     | CNTNAP4   |
| AP4B1    | AP1B1     | COG2      |
| AP4E1    | AP2A1     | COL13A1   |
| APAF1    | AP3B1     | COMMD9    |
| APBH     | AP3B2     | COPS2     |
| APITD1   | AP4E1     | CORO7     |
| APLN     | APBB1IP   | CPNE8     |
| APOA5    | APBB2     | CPSF6     |
| AQP11    | APCDD1L   | CRTAC1    |
| AQP4     | APH1B     | CRYGN     |
| AQP5     | APOA2     | CSDA      |
| AR       | APOA4     | CSE1L     |
| ARF3     | APOBEC2   | CSMD1     |
| ARFGAP1  | APOBEC3C  | CST6      |
| ARFGAP2  | APOH      | CTDSP2    |
| ARFIP2   | APOL6     | CTHRC1    |
| ARHGAP1  | APPL2     | CTTNBP2NL |
| ARHGAP19 | AQP11     | CUEDC1    |
| ARHGAP25 | AQP9      | CXCL9     |
| ARHGAP28 | AR        | CXCR7     |
| ARHGAP4  | ARCN1     | CYP24A1   |
| ARHGAP5  | ARFGAP2   | D2HGDH    |
| ARHGDIA  | ARFIP2    | DAAM1     |
| ARHGEF2  | ARFRP1    | DBC1      |
| ARID4A   | ARG2      | DDX4      |
| ARID4B   | ARHGAP11A | DEDD      |

|          |          |         |
|----------|----------|---------|
| ARL11    | ARHGAP15 | DEF8    |
| ARL15    | ARHGAP18 | DEPDC5  |
| ARL2     | ARHGAP22 | DET1    |
| ARL6IP1  | ARHGAP26 | DGKQ    |
| ARL6IP6  | ARHGAP27 | DGKZ    |
| ARL8B    | ARHGDI A | DHRS13  |
| ARMC6    | ARHGDI B | DIXDC1  |
| ARMCX2   | ARHGEF12 | DMRT2   |
| ARPC5    | ARID4A   | DMRTA1  |
| ARPP19   | ARID4B   | DMXL1   |
| ARPP21   | ARL10    | DNAJA1  |
| ARRB1    | ARL11    | DNAJC7  |
| ARRDC3   | ARL2     | DOCK6   |
| ASAH3    | ARL6IP6  | DOCK7   |
| ASB1     | ARL8B    | DOCK8   |
| ASB3     | ARMC1    | DPP3    |
| ASB6     | ARMC4    | DR1     |
| ASCL3    | ARMCX1   | DUSP10  |
| ASH1L    | ARMCX2   | DUSP2   |
| ASH2L    | ARMCX3   | DUSP8   |
| ASNA1    | ARPC5    | EDARADD |
| ASPRV1   | ARPC5L   | EDNRA   |
| ASZ1     | ARPP-19  | EED     |
| ATG12    | ARPP-21  | EFCAB5  |
| ATG4B    | ARRB1    | EHD1    |
| ATG9A    | ARSF     | EIF2B2  |
| ATP11A   | ASB1     | EIF2B5  |
| ATP5E    | ASB2     | EIF3A   |
| ATP6VOD1 | ASB3     | EIF3B   |
| ATP6V1G3 | ASB4     | EIF3G   |
| ATP7A    | ASCC2    | ELAVL2  |
| ATP8A1   | ASCC3    | EME1    |
| ATP8B3   | ASH1L    | EML5    |
| ATP9B    | ASH2L    | EMX1    |
| ATRNL1   | ASNSD1   | EPC2    |
| ATXN10   | ASXL1    | EPHA1   |
| ATXN1L   | ASXL2    | EPHA7   |
| ATXN2    | ATAD1    | ERLIN1  |
| ATXN7L2  | ATF1     | ERRFI1  |
| AU019823 | ATG12    | ESCO1   |
| AU021034 | ATG2A    | ESRRA   |
| AU022870 | ATG4B    | ETFB    |
| AURKAIP1 | ATG5     | ETS1    |
| AURKB    | ATG7     | EVI5L   |
| AW146020 | ATG9A    | EVPL    |
| AW551984 | ATG9B    | FA2H    |



|               |          |         |
|---------------|----------|---------|
| AXIN1         | ATN1     | FAH     |
| AXL           | ATOH8    | FAP     |
| B230217C12RIK | ATP10A   | FBXW5   |
| B2M           | ATP13A2  | FDFT1   |
| B3GALNT2      | ATP1A2   | FECH    |
| B3GALTL       | ATP1B4   | FGGY    |
| B3GAT1        | ATP4B    | FLVCR2  |
| B3GNT5        | ATP5G2   | FMO1    |
| B3GNT6        | ATP5SL   | FNDC4   |
| B3GNT7        | ATP6AP2  | FNTA    |
| B3GNL1        | ATP6V0A2 | FOXD1   |
| B4GALT1       | ATP6V0B  | FOXJ2   |
| B4GALT3       | ATP6V1A  | FSCN1   |
| B4GALT6       | ATP6V1B2 | FUK     |
| B4GALT7       | ATP8A1   | FURIN   |
| BAG3          | ATPBD1C  | FUT8    |
| BAIAP2L2      | ATPIF1   | FXC1    |
| BAMBI         | ATXN2    | From    |
| BANF2         | ATXN7L2  | GABPB2  |
| BAP1          | AUTS2    | GABRA3  |
| BASP1         | AVEN     | GABRG3  |
| BAT1A         | AZU1     | GADD45A |
| BATF3         | B3GAT3   | GALNT1  |
| BBC3          | B3GNT7   | GALNT3  |
| BC003266      | B3GNL1   | GALNT7  |
| BC004004      | B4GALNT3 | GBL     |
| BC017612      | B4GALNT4 | GIN1    |
| BC017643      | B4GALT2  | GJB3    |
| BC017647      | BAALC    | GJB5    |
| BC018465      | BAG2     | GLDC    |
| BC021785      | BAG3     | GMFB    |
| BC021891      | BAG4     | GNAI2   |
| BC023829      | BAHCC1   | GNE     |
| BC024479      | BAI3     | GOLGA1  |
| BC046331      | BAIAP2L1 | GPATCH3 |
| BC049715      | BANF1    | GPM6A   |
| BC051019      | BAT2D1   | GPR137B |
| BC054059      | BAT4     | GPR26   |
| BC066028      | BATF3    | GPR64   |
| BC068281      | BAZ1A    | GPSM3   |
| BCCIP         | BAZ1B    | GPT2    |
| BCL2          | BBC3     | GPX7    |
| BCL6          | BCAN     | GRB7    |
| BCL9L         | BCAR1    | GRM3    |
| BDH1          | BCL2     | GSTO1   |
| BECN1         | BCL2A1   | GTF3C1  |

|                      |                  |                  |
|----------------------|------------------|------------------|
| <i>BGLAP-RS1</i>     | <i>BCL2L1</i>    | <i>GZF1</i>      |
| <i>BGLAP2</i>        | <i>BCL2L11</i>   | <i>H3F3B</i>     |
| <i>BGN</i>           | <i>BCL2L15</i>   | <i>HCRT</i>      |
| <i>BHMT</i>          | <i>BCL7B</i>     | <i>HDAC8</i>     |
| <i>BIN1</i>          | <i>BCL9L</i>     | <i>HELZ</i>      |
| <i>BIRC5</i>         | <i>BCS1L</i>     | <i>HERPUD2</i>   |
| <i>BLZF1</i>         | <i>BECN1</i>     | <i>HEY1</i>      |
| <i>BMP1</i>          | <i>BEST3</i>     | <i>HIST2H2BE</i> |
| <i>BMX</i>           | <i>BEST4</i>     | <i>HLX</i>       |
| <i>BMYC</i>          | <i>BET1</i>      | <i>HMOX1</i>     |
| <i>BNIP2</i>         | <i>BGN</i>       | <i>HOXA1</i>     |
| <i>BNIP1</i>         | <i>BIRC5</i>     | <i>HPS4</i>      |
| <i>BPIL3</i>         | <i>BLK</i>       | <i>HPSE2</i>     |
| <i>BRI3</i>          | <i>BLVRB</i>     | <i>HSD3B2</i>    |
| <i>BRMS1L</i>        | <i>BMPR2</i>     | <i>HSPA1B</i>    |
| <i>BRP16</i>         | <i>BMS1</i>      | <i>HUS1</i>      |
| <i>BRPF1</i>         | <i>BNC2</i>      | <i>IFT140</i>    |
| <i>BRSK2</i>         | <i>BOLA3</i>     | <i>IHPK3</i>     |
| <i>BRUNOL4</i>       | <i>BRAF</i>      | <i>IKZF3</i>     |
| <i>BRWD3</i>         | <i>BRAP</i>      | <i>IL17RD</i>    |
| <i>BSCL2</i>         | <i>BRD1</i>      | <i>IL1A</i>      |
| <i>BSPRY</i>         | <i>BRF2</i>      | <i>IL21R</i>     |
| <i>BTBD10</i>        | <i>BRI3</i>      | <i>IL8RB</i>     |
| <i>BTG2</i>          | <i>BRMS1</i>     | <i>INVS</i>      |
| <i>BTN1A1</i>        | <i>BRP44L</i>    | <i>IRF2BP1</i>   |
| <i>BUTR1</i>         | <i>BRPF3</i>     | <i>ITGA11</i>    |
| <i>BZW2</i>          | <i>BRS3</i>      | <i>ITPR2</i>     |
| <i>C1QA</i>          | <i>BRSK1</i>     | <i>ITSN2</i>     |
| <i>C1QL1</i>         | <i>BRSK2</i>     | <i>JAG1</i>      |
| <i>C1QL3</i>         | <i>BSND</i>      | <i>KCNA1</i>     |
| <i>C1QTNF2</i>       | <i>BTBD11</i>    | <i>KCNE1L</i>    |
| <i>C1QTNF3</i>       | <i>BTBD9</i>     | <i>KCNF1</i>     |
| <i>C1QTNF5</i>       | <i>BTG2</i>      | <i>KCNIP4</i>    |
| <i>C1QTNF7</i>       | <i>BTG4</i>      | <i>KCNJ11</i>    |
| <i>C1QTNF9</i>       | <i>BTLA</i>      | <i>KCNK3</i>     |
| <i>C330005M16RIK</i> | <i>C10ORF12</i>  | <i>KCNN3</i>     |
| <i>CAB39L</i>        | <i>C10ORF125</i> | <i>KCNQ5</i>     |
| <i>CABIN1</i>        | <i>C10ORF26</i>  | <i>KCTD13</i>    |
| <i>CABLES2</i>       | <i>C10ORF4</i>   | <i>KCTD5</i>     |
| <i>CABP5</i>         | <i>C10ORF55</i>  | <i>KDEL2</i>     |
| <i>CACNB1</i>        | <i>C10ORF63</i>  | <i>KDEL3</i>     |
| <i>CACNG1</i>        | <i>C10ORF65</i>  | <i>KIF5C</i>     |
| <i>CADM2</i>         | <i>C10ORF72</i>  | <i>KLC1</i>      |
| <i>CADPS</i>         | <i>C10ORF81</i>  | <i>KLC3</i>      |
| <i>CALB1</i>         | <i>C10ORF82</i>  | <i>KLHDC8B</i>   |
| <i>CALCA</i>         | <i>C10ORF83</i>  | <i>KLHL10</i>    |

|                 |                  |                  |
|-----------------|------------------|------------------|
| <i>CALCOCO1</i> | <i>C10ORF92</i>  | <i>KRR1</i>      |
| <i>CALD1</i>    | <i>C11ORF10</i>  | <i>KRT34</i>     |
| <i>CALM1</i>    | <i>C11ORF17</i>  | <i>LAMB2</i>     |
| <i>CALML3</i>   | <i>C11ORF30</i>  | <i>LAMC3</i>     |
| <i>CALY</i>     | <i>C11ORF41</i>  | <i>LCK</i>       |
| <i>CAMK2B</i>   | <i>C11ORF42</i>  | <i>LGI1</i>      |
| <i>CANT1</i>    | <i>C11ORF61</i>  | <i>LGI3</i>      |
| <i>CAP2</i>     | <i>C11ORF68</i>  | <i>LHCGR</i>     |
| <i>CAPG</i>     | <i>C11ORF75</i>  | <i>LHX8</i>      |
| <i>CAR10</i>    | <i>C12ORF32</i>  | <i>LIMCH1</i>    |
| <i>CAR14</i>    | <i>C12ORF4</i>   | <i>LIPE</i>      |
| <i>CAR7</i>     | <i>C12ORF52</i>  | <i>LIPI</i>      |
| <i>CARD10</i>   | <i>C12ORF56</i>  | <i>LMBR1L</i>    |
| <i>CARS</i>     | <i>C12ORF57</i>  | <i>LPO</i>       |
| <i>CASKIN2</i>  | <i>C12ORF59</i>  | <i>LRRC52</i>    |
| <i>CASP1</i>    | <i>C13ORF16</i>  | <i>LRRN2</i>     |
| <i>CASP9</i>    | <i>C13ORF23</i>  | <i>LYSMD2</i>    |
| <i>CASS4</i>    | <i>C13ORF3</i>   | <i>MAF1</i>      |
| <i>CBFB</i>     | <i>C14ORF149</i> | <i>MAFB</i>      |
| <i>CBL</i>      | <i>C14ORF181</i> | <i>MAGI3</i>     |
| <i>CBLC</i>     | <i>C14ORF2</i>   | <i>MAN1B1</i>    |
| <i>CBX1</i>     | <i>C14ORF28</i>  | <i>MAP3K12</i>   |
| <i>CBY1</i>     | <i>C14ORF37</i>  | <i>MAP3K14</i>   |
| <i>CC2D1B</i>   | <i>C14ORF39</i>  | <i>MAP3K7IP3</i> |
| <i>CCBP2</i>    | <i>C15ORF17</i>  | <i>MAPKAPK2</i>  |
| <i>CCDC100</i>  | <i>C15ORF2</i>   | <i>MARCH4</i>    |
| <i>CCDC101</i>  | <i>C15ORF48</i>  | <i>MAT2A</i>     |
| <i>CCDC11</i>   | <i>C16ORF3</i>   | <i>MBOAT1</i>    |
| <i>CCDC113</i>  | <i>C16ORF46</i>  | <i>MED8</i>      |
| <i>CCDC117</i>  | <i>C16ORF57</i>  | <i>MED9</i>      |
| <i>CCDC120</i>  | <i>C16ORF63</i>  | <i>METTL9</i>    |
| <i>CCDC122</i>  | <i>C16ORF73</i>  | <i>MFAP4</i>     |
| <i>CCDC123</i>  | <i>C16ORF84</i>  | <i>MGAT5B</i>    |
| <i>CCDC144B</i> | <i>C17ORF56</i>  | <i>MICAL1</i>    |
| <i>CCDC28A</i>  | <i>C17ORF57</i>  | <i>MKRN3</i>     |
| <i>CCDC38</i>   | <i>C17ORF58</i>  | <i>MLXIP</i>     |
| <i>CCDC46</i>   | <i>C17ORF59</i>  | <i>MMD</i>       |
| <i>CCDC49</i>   | <i>C18ORF22</i>  | <i>MON1B</i>     |
| <i>CCDC59</i>   | <i>C18ORF25</i>  | <i>MPDU1</i>     |
| <i>CCDC64</i>   | <i>C18ORF34</i>  | <i>MPP1</i>      |
| <i>CCDC71</i>   | <i>C18ORF62</i>  | <i>MREG</i>      |
| <i>CCDC80</i>   | <i>C19ORF10</i>  | <i>MRPL18</i>    |
| <i>CCDC85A</i>  | <i>C19ORF22</i>  | <i>MRPS2</i>     |
| <i>CCDC86</i>   | <i>C19ORF25</i>  | <i>MTDH</i>      |
| <i>CCDC88C</i>  | <i>C19ORF36</i>  | <i>MTFR1</i>     |
| <i>CCDC90B</i>  | <i>C19ORF40</i>  | <i>MTPP</i>      |

|                 |                  |                |
|-----------------|------------------|----------------|
| <i>CCDC96</i>   | <i>C19ORF50</i>  | <i>MYBL2</i>   |
| <i>CCL1</i>     | <i>C19ORF56</i>  | <i>MYH3</i>    |
| <i>CCL9</i>     | <i>C1GALT1</i>   | <i>NAB2</i>    |
| <i>CCM2</i>     | <i>C1ORF102</i>  | <i>NADK</i>    |
| <i>CCND2</i>    | <i>C1ORF110</i>  | <i>NAGPA</i>   |
| <i>CCNE1</i>    | <i>C1ORF113</i>  | <i>NAT14</i>   |
| <i>CCNE2</i>    | <i>C1ORF122</i>  | <i>NCLN</i>    |
| <i>CCNJL</i>    | <i>C1ORF129</i>  | <i>NCOA2</i>   |
| <i>CCNY</i>     | <i>C1ORF135</i>  | <i>NCOR2</i>   |
| <i>CCT2</i>     | <i>C1ORF142</i>  | <i>NDUFA4</i>  |
| <i>CD200R1</i>  | <i>C1ORF144</i>  | <i>NEDD1</i>   |
| <i>CD209A</i>   | <i>C1ORF150</i>  | <i>NEFL</i>    |
| <i>CD2BP2</i>   | <i>C1ORF163</i>  | <i>NEURL</i>   |
| <i>CD36</i>     | <i>C1ORF164</i>  | <i>NEUROD1</i> |
| <i>CD3D</i>     | <i>C1ORF173</i>  | <i>NEUROD2</i> |
| <i>CD40</i>     | <i>C1ORF19</i>   | <i>NEUROG3</i> |
| <i>CD48</i>     | <i>C1ORF21</i>   | <i>NFASC</i>   |
| <i>CD79A</i>    | <i>C1ORF26</i>   | <i>NFATC3</i>  |
| <i>CD81</i>     | <i>C1ORF27</i>   | <i>NLRX1</i>   |
| <i>CD86</i>     | <i>C1ORF54</i>   | <i>NMI</i>     |
| <i>CD8A</i>     | <i>C1ORF69</i>   | <i>NOL4</i>    |
| <i>CD93</i>     | <i>C1ORF92</i>   | <i>NPAS4</i>   |
| <i>CD97</i>     | <i>C1QB</i>      | <i>NPEPL1</i>  |
| <i>CDC123</i>   | <i>C1QTNF5</i>   | <i>NPR2</i>    |
| <i>CDC25A</i>   | <i>C1QTNF7</i>   | <i>NR2C2AP</i> |
| <i>CDC2L1</i>   | <i>C20ORF108</i> | <i>NRBP1</i>   |
| <i>CDC37</i>    | <i>C20ORF114</i> | <i>NT5DC2</i>  |
| <i>CDC37L1</i>  | <i>C20ORF118</i> | <i>NT5E</i>    |
| <i>CDC42EP2</i> | <i>C20ORF134</i> | <i>NUMA1</i>   |
| <i>CDC42SE2</i> | <i>C20ORF186</i> | <i>NXPH2</i>   |
| <i>CDCA5</i>    | <i>C20ORF20</i>  | <i>OMG</i>     |
| <i>CDCA7</i>    | <i>C20ORF200</i> | <i>OPRS1</i>   |
| <i>CDCA8</i>    | <i>C20ORF26</i>  | <i>ORC3L</i>   |
| <i>CDH12</i>    | <i>C20ORF29</i>  | <i>ORMDL3</i>  |
| <i>CDH15</i>    | <i>C20ORF43</i>  | <i>OSGEP</i>   |
| <i>CDH16</i>    | <i>C20ORF46</i>  | <i>OSGEPL1</i> |
| <i>CDH20</i>    | <i>C20ORF96</i>  | <i>OSGIN2</i>  |
| <i>CDH26</i>    | <i>C21ORF55</i>  | <i>P4HA2</i>   |
| <i>CDH7</i>     | <i>C21ORF56</i>  | <i>PACS1</i>   |
| <i>CDK5RAP1</i> | <i>C21ORF62</i>  | <i>PAWR</i>    |
| <i>CDK5RAP2</i> | <i>C21ORF70</i>  | <i>PDC</i>     |
| <i>CDK8</i>     | <i>C22ORF28</i>  | <i>PDCD6</i>   |
| <i>CDK9</i>     | <i>C22ORF29</i>  | <i>PDE10A</i>  |
| <i>CDKL2</i>    | <i>C22ORF32</i>  | <i>PDE1B</i>   |
| <i>CDS2</i>     | <i>C2CD2</i>     | <i>PDE4A</i>   |
| <i>CEACAM10</i> | <i>C2ORF15</i>   | <i>PDLIM3</i>  |

|                |                 |                 |
|----------------|-----------------|-----------------|
| <i>CELSR3</i>  | <i>C2ORF42</i>  | <i>PDSS1</i>    |
| <i>CENTG2</i>  | <i>C2ORF60</i>  | <i>PDZD4</i>    |
| <i>CEP152</i>  | <i>C2ORF61</i>  | <i>PGAM2</i>    |
| <i>CFHR1</i>   | <i>C2ORF7</i>   | <i>PGD</i>      |
| <i>CFTR</i>    | <i>C3ORF10</i>  | <i>PGM1</i>     |
| <i>CGA</i>     | <i>C3ORF25</i>  | <i>PGM2</i>     |
| <i>CHCHD8</i>  | <i>C3ORF37</i>  | <i>PHOX2B</i>   |
| <i>CHD7</i>    | <i>C3ORF58</i>  | <i>PIGM</i>     |
| <i>CHD9</i>    | <i>C4ORF15</i>  | <i>PIP</i>      |
| <i>CHEK1</i>   | <i>C4ORF34</i>  | <i>PIP5K1B</i>  |
| <i>CHEK2</i>   | <i>C5ORF13</i>  | <i>PITPNM2</i>  |
| <i>CHGA</i>    | <i>C5ORF23</i>  | <i>PLA2G2F</i>  |
| <i>CHGB</i>    | <i>C5ORF39</i>  | <i>PLAG1</i>    |
| <i>CHIA</i>    | <i>C5ORF42</i>  | <i>PLCD1</i>    |
| <i>CHMP1A</i>  | <i>C6ORF108</i> | <i>PLEKHA6</i>  |
| <i>CHMP7</i>   | <i>C6ORF120</i> | <i>PLXNB1</i>   |
| <i>CHORDC1</i> | <i>C6ORF154</i> | <i>PMF1</i>     |
| <i>CHRAC1</i>  | <i>C6ORF201</i> | <i>PMPCB</i>    |
| <i>CHRNA10</i> | <i>C6ORF203</i> | <i>PNO1</i>     |
| <i>CHRNB2</i>  | <i>C6ORF223</i> | <i>PNPLA2</i>   |
| <i>CHRNB4</i>  | <i>C6ORF47</i>  | <i>PNPLA6</i>   |
| <i>CHRNE</i>   | <i>C6ORF57</i>  | <i>POLQ</i>     |
| <i>CHST1</i>   | <i>C6ORF60</i>  | <i>POMC</i>     |
| <i>CHUK</i>    | <i>C6ORF66</i>  | <i>POU4F2</i>   |
| <i>CIAO1</i>   | <i>C7ORF20</i>  | <i>PPAP2A</i>   |
| <i>CIB1</i>    | <i>C7ORF27</i>  | <i>PPARGC1B</i> |
| <i>CIB2</i>    | <i>C7ORF30</i>  | <i>PPID</i>     |
| <i>CIDEA</i>   | <i>C7ORF33</i>  | <i>PIIH</i>     |
| <i>CIDEB</i>   | <i>C7ORF41</i>  | <i>PPM1E</i>    |
| <i>CLCN7</i>   | <i>C7ORF42</i>  | <i>PPP2R1A</i>  |
| <i>CLCNKB</i>  | <i>C7ORF43</i>  | <i>PPP5C</i>    |
| <i>CLDN1</i>   | <i>C7ORF49</i>  | <i>PPT1</i>     |
| <i>CLDN2</i>   | <i>C7ORF52</i>  | <i>PRICKLE1</i> |
| <i>CLDND1</i>  | <i>C8A</i>      | <i>PRKAG2</i>   |
| <i>CLEC14A</i> | <i>C8ORF31</i>  | <i>PRKCZ</i>    |
| <i>CLEC1A</i>  | <i>C8ORF32</i>  | <i>PRKG1</i>    |
| <i>CLEC1B</i>  | <i>C8ORF44</i>  | <i>PROZ</i>     |
| <i>CLEC2E</i>  | <i>C8ORF53</i>  | <i>PRR16</i>    |
| <i>CLINT1</i>  | <i>C8ORF55</i>  | <i>PRTG</i>     |
| <i>CLN8</i>    | <i>C8ORF58</i>  | <i>PSD2</i>     |
| <i>CLOCK</i>   | <i>C8ORF76</i>  | <i>PSKH1</i>    |
| <i>CLRN1</i>   | <i>C8ORF79</i>  | <i>PSMD13</i>   |
| <i>CLTB</i>    | <i>C9ORF125</i> | <i>PTCD3</i>    |
| <i>CLYBL</i>   | <i>C9ORF128</i> | <i>PTH</i>      |
| <i>CMC1</i>    | <i>C9ORF150</i> | <i>PTPN13</i>   |
| <i>CNFN</i>    | <i>C9ORF18</i>  | <i>PTPN18</i>   |

|         |           |           |
|---------|-----------|-----------|
| CNGA2   | C9ORF19   | PTPN2     |
| CNGA4   | C9ORF24   | PYGO2     |
| CNGB3   | C9ORF32   | R3HDM1    |
| CNIH2   | C9ORF47   | RAB11FIP5 |
| CNN1    | C9ORF61   | RAB15     |
| CNOT6   | C9ORF7    | RAB32     |
| CNP     | C9ORF72   | RAB34     |
| CNTF    | CA14      | RAB4B     |
| CNTN2   | CA9       | RAB7L1    |
| CNTNAP2 | CABLES2   | RABEPK    |
| CNTNAP4 | CABP1     | RABL4     |
| COASY   | CACNB4    | RAVER2    |
| COG2    | CADPS     | RBM15     |
| COL10A1 | CALB2     | RBM6      |
| COL13A1 | CALCR     | RBMS2     |
| COL1A1  | CALM1     | RCN3      |
| COL4A1  | CALML6    | RCOR2     |
| COL4A4  | CALR      | RDH12     |
| COL9A2  | CALU      | REEP3     |
| COLEC10 | CAMK2B    | RELL1     |
| COMMD4  | CAMK2D    | RFTN2     |
| COMMD8  | CAMK2N1   | RFXDC1    |
| COMMD9  | CAMK4     | RGMA      |
| COMTD1  | CAMKK1    | RGS10     |
| COPA    | CAMSAP1L1 | RGS7BP    |
| COP52   | CAND1     | RHEBL1    |
| COQ2    | CANT1     | RHOBTB1   |
| CORIN   | CAPN3     | RHOD      |
| CORO1B  | CAPN6     | RNF135    |
| CORO1C  | CARHSP1   | RNF138    |
| CORO7   | CARS      | RNF219    |
| COTL1   | CARS2     | RNF25     |
| COX11   | CASKIN1   | RNGTT     |
| COX5B   | CASP3     | RPA2      |
| COX6A2  | CASQ1     | RPL37A    |
| COX6B2  | CASZ1     | RPP25     |
| COX6C   | CAT       | RPP40     |
| CPEB1   | CATSPER1  | RPS6KA5   |
| CPLX3   | CBARA1    | RPS6KB2   |
| CPNE7   | CBFA2T3   | RRAD      |
| CPNE8   | CBFB      | RRAS      |
| CPSF1   | CBR3      | RSF1      |
| CPSF3   | CBX6      | RSPO2     |
| CPSF4L  | CBX7      | RTN4R     |
| CPSF6   | CBY1      | RUNX1T1   |
| CPT1B   | CC2D2B    | S100A3    |

|                  |                |                 |
|------------------|----------------|-----------------|
| <i>CPXCR1</i>    | <i>CCDC120</i> | <i>S100A5</i>   |
| <i>CPXM2</i>     | <i>CCDC126</i> | <i>SAP30BP</i>  |
| <i>CRABP1</i>    | <i>CCDC134</i> | <i>SATB2</i>    |
| <i>CRADD</i>     | <i>CCDC135</i> | <i>SBF1</i>     |
| <i>CRELD2</i>    | <i>CCDC19</i>  | <i>SCEL</i>     |
| <i>CRISPLD2</i>  | <i>CCDC28A</i> | <i>SCN1A</i>    |
| <i>CRLF2</i>     | <i>CCDC28B</i> | <i>SCNN1G</i>   |
| <i>CRTAC1</i>    | <i>CCDC3</i>   | <i>SDCBP2</i>   |
| <i>CRTC2</i>     | <i>CCDC46</i>  | <i>SEC22C</i>   |
| <i>CRYGA</i>     | <i>CCDC47</i>  | <i>SEC23B</i>   |
| <i>CRYGB</i>     | <i>CCDC52</i>  | <i>SEMA3A</i>   |
| <i>CRYGF</i>     | <i>CCDC56</i>  | <i>SEMA6D</i>   |
| <i>CRYGN</i>     | <i>CCDC57</i>  | <i>SERP1</i>    |
| <i>CRYL1</i>     | <i>CCDC6</i>   | <i>SERPINB8</i> |
| <i>CSDA</i>      | <i>CCDC65</i>  | <i>SERPINF2</i> |
| <i>CSDC2</i>     | <i>CCDC81</i>  | <i>SESN1</i>    |
| <i>CSE1L</i>     | <i>CCDC83</i>  | <i>SETD7</i>    |
| <i>CSF1R</i>     | <i>CCDC88C</i> | <i>SFRS11</i>   |
| <i>CSF2RA</i>    | <i>CCDC96</i>  | <i>SFXN2</i>    |
| <i>CSF2RB</i>    | <i>CCL15</i>   | <i>SGCG</i>     |
| <i>CSF3R</i>     | <i>CCL19</i>   | <i>SH2D2A</i>   |
| <i>CSMD1</i>     | <i>CCL23</i>   | <i>SH3BP5</i>   |
| <i>CSN1S2A</i>   | <i>CCL25</i>   | <i>SIN3A</i>    |
| <i>CSNK1G1</i>   | <i>CCM2</i>    | <i>SKIV2L2</i>  |
| <i>CSNK1G2</i>   | <i>CCNA1</i>   | <i>SLC1A5</i>   |
| <i>CSPG4</i>     | <i>CCND2</i>   | <i>SLC22A18</i> |
| <i>CST6</i>      | <i>CCNE1</i>   | <i>SLC25A10</i> |
| <i>CTDSP2</i>    | <i>CCNE2</i>   | <i>SLC25A5</i>  |
| <i>CTHRC1</i>    | <i>CCNG2</i>   | <i>SLC29A1</i>  |
| <i>CTPS</i>      | <i>CCNJL</i>   | <i>SLC2A1</i>   |
| <i>CTR9</i>      | <i>CCNK</i>    | <i>SLC35A5</i>  |
| <i>CTSW</i>      | <i>CCR10</i>   | <i>SLC35B3</i>  |
| <i>CTTNBP2NL</i> | <i>CCR4</i>    | <i>SLC36A1</i>  |
| <i>CUEDC1</i>    | <i>CCT7</i>    | <i>SLC37A1</i>  |
| <i>CUL5</i>      | <i>CD177</i>   | <i>SLC37A3</i>  |
| <i>CXADR</i>     | <i>CD180</i>   | <i>SLC38A7</i>  |
| <i>CXCL3</i>     | <i>CD1A</i>    | <i>SLC39A5</i>  |
| <i>CXCL9</i>     | <i>CD1D</i>    | <i>SLC41A2</i>  |
| <i>CXCR3</i>     | <i>CD2</i>     | <i>SLC41A3</i>  |
| <i>CXCR5</i>     | <i>CD207</i>   | <i>SLC43A2</i>  |
| <i>CXCR7</i>     | <i>CD300C</i>  | <i>SLC46A3</i>  |
| <i>CXXC4</i>     | <i>CD300LG</i> | <i>SLC5A11</i>  |
| <i>CYC1</i>      | <i>CD33</i>    | <i>SLC6A4</i>   |
| <i>CYFIP2</i>    | <i>CD3E</i>    | <i>SLC6A8</i>   |
| <i>CYP24A1</i>   | <i>CD4</i>     | <i>SLC7A10</i>  |
| <i>CYP2C38</i>   | <i>CD40</i>    | <i>SMC6</i>     |

|               |          |         |
|---------------|----------|---------|
| CYP2C54       | CD48     | SMPD1   |
| CYP2D22       | CD55     | SNAI1   |
| CYP39A1       | CD6      | SNAPIN  |
| CYP3A13       | CD70     | SNCG    |
| CYPT2         | CD72     | SNF1LK  |
| CYTL1         | CD80     | SNRK    |
| D0H4S114      | CD83     | SNX2    |
| D16H22S680E   | CD8A     | SNX25   |
| D17H6S56E-3   | CD93     | SNX33   |
| D18ERTD653E   | CD97     | SOCS1   |
| D19ERTD386E   | CDC14A   | SOCS3   |
| D2ERTD750E    | CDC14B   | SOS1    |
| D2HGDH        | CDC37    | SPAG7   |
| D2WSU81E      | CDC37L1  | SPATA16 |
| D330028D13RIK | CDC42    | SPEN    |
| D330038O06RIK | CDH13    | SPON1   |
| D4BWG0951E    | CDK5RAP3 | SRFBP1  |
| D630042P16RIK | CDK8     | SRP72   |
| DAAM1         | CEACAM4  | SRPX2   |
| DAAM2         | CEACAM6  | SSTR1   |
| DACH1         | CELSR3   | ST3GAL3 |
| DAF2          | CENPO    | STAG3   |
| DAK           | CENPT    | STC1    |
| DAP3          | CENTA2   | STK17B  |
| DAPK2         | CEP76    | STK19   |
| DAPP1         | CH25H    | STOX2   |
| DAZL          | CHD9     | SUOX    |
| DBC1          | CHEK1    | SURF4   |
| DBP           | CHGA     | SYNGR3  |
| DCPS          | CHI3L1   | SYT1    |
| DCTD          | CHIA     | SYVN1   |
| DCXR          | CHMP1A   | TACC2   |
| DDB2          | CHMP6    | TASP1   |
| DDI1          | CHMP7    | TBC1D12 |
| DDIT4L        | CHORDC1  | TBC1D19 |
| DDX1          | CHPT1    | TCF25   |
| DDX21         | CHRNA4   | TCP1    |
| DDX4          | CHRNA5   | TDRD7   |
| DDX54         | CHST2    | TGIF2   |
| DEAF1         | CHST3    | THBD    |
| DEDD          | CHST4    | THUMPD1 |
| DEF8          | CHST9    | TJAP1   |
| DEFB25        | CIAPIN1  | TK2     |
| DEFB30        | CIB2     | TKTL1   |
| DEFB50        | CIDEB    | TM9SF3  |
| DENND2C       | CIDEC    | TMEFF1  |



|          |         |          |
|----------|---------|----------|
| DEPDC5   | CIITA   | TMEM121  |
| DERL1    | CINP    | TMEM128  |
| DET1     | CISH    | TMEM177  |
| DEXI     | CITED1  | TMEM55A  |
| DGCR6    | CLDN1   | TMEM80   |
| DGCR8    | CLDN12  | TNFAIP1  |
| DGKQ     | CLDN18  | TNFSF10  |
| DGKZ     | CLDN2   | TNNC2    |
| DGUOK    | CLDN3   | TNRC4    |
| DHRS13   | CLDN9   | TOMM34   |
| DHRS9    | CLEC12B | TOR1AIP1 |
| DHX35    | CLEC4D  | TRIM6    |
| DIABLO   | CLEC4F  | TRO      |
| DIP2B    | CLIP4   | TSHB     |
| DISP2    | CLK4    | TSN      |
| DIXDC1   | CLMN    | TSP50    |
| DLL1     | CLN5    | TSPYL2   |
| DLX3     | CLN6    | TSPYL4   |
| DMN      | CLN8    | TUBA1A   |
| DMRT2    | CLOCK   | TUT1     |
| DMRTA1   | CLRN1   | TXNDC12  |
| DMWD     | CLSTN1  | TXNDC13  |
| DMXL1    | CMTM1   | TXNDC4   |
| DNAJA1   | CMTM6   | UACA     |
| DNAJA2   | CMTM7   | UBAC1    |
| DNAJA3   | CNN1    | UBN1     |
| DNAJC15  | CNOT6   | UGP2     |
| DNAJC7   | CNOT7   | UHRF1BP1 |
| DNAJC9   | CNP     | UMOD     |
| DNASE1L3 | CNTD1   | UNC119B  |
| DNM1L    | CNTFR   | UNC93B1  |
| DNMBP    | CNTN2   | UNK      |
| DNTTIP2  | CNTN4   | UQCRC1   |
| DOCK6    | CNTNAP4 | USP14    |
| DOCK7    | COCH    | USP32    |
| DOCK8    | COG2    | USP48    |
| DOHH     | COG3    | UTP15    |
| DOS      | COIL    | VAMP8    |
| DPAGT1   | COL11A1 | VARS     |
| DPH5     | COL13A1 | VAT1     |
| DPP3     | COL24A1 | VIT      |
| DPP4     | COL2A1  | VPS24    |
| DPP7     | COL5A1  | VPS33B   |
| DPT      | COL6A3  | VPS39    |
| DPY19L3  | COL9A3  | VTI1B    |
| DPY30    | COMMD9  | WARS2    |

|               |           |         |
|---------------|-----------|---------|
| DPYS          | COPS2     | WBP11   |
| DR1           | COPS4     | WDR59   |
| DRD1A         | CORO7     | WDR91   |
| DRD2          | CPA3      | WDR92   |
| DSEL          | CPE       | WDTC1   |
| DTL           | CPNE8     | WNT8A   |
| DTNA          | CPO       | WRNIP1  |
| DTX2          | CPSF3L    | WSCD2   |
| DTYMK         | CPSF6     | XYLB    |
| DUOXA2        | CRAMP1L   | YWHAB   |
| DUSP10        | CRB1      | ZBTB7B  |
| DUSP16        | CRB3      | ZC3H3   |
| DUSP19        | CRHBP     | ZCCHC9  |
| DUSP2         | CRIP2     | ZDHHC16 |
| DUSP4         | CRISP1    | ZFHX4   |
| DUSP8         | CRK       | ZFP36L1 |
| DYNC2H1       | CRLS1     | ZFP91   |
| DYNLL2        | CRMP1     | ZNHIT3  |
| DYNLT3        | CROCC     | ZNRF1   |
| DYRK1B        | CRTAC1    | ZYX     |
| E030010A14RIK | CRYBA1    |         |
| E130203B14RIK | CRYGN     |         |
| E130306D19RIK | CRYM      |         |
| E2F5          | CSDA      |         |
| EAF1          | CSE1L     |         |
| EAF2          | CSMD1     |         |
| EAPA2         | CSMD2     |         |
| EBAG9         | CSNK2A2   |         |
| EBI2          | CSPG5     |         |
| EBPL          | CST11     |         |
| ECD           | CST6      |         |
| ECHDC2        | CST9L     |         |
| ECHS1         | CSTL1     |         |
| EDARADD       | CTAG2     |         |
| EDN2          | CTDSP2    |         |
| EDNRA         | CTHRC1    |         |
| EDNRB         | CTNNA3    |         |
| EED           | CTNNBIP1  |         |
| EEF1G         | CTRC      |         |
| EEF2          | CTSA      |         |
| EEF2K         | CTSC      |         |
| EFCAB1        | CTSF      |         |
| EFCAB2        | CTSL1     |         |
| EFCAB5        | CTSO      |         |
| EFCBP2        | CTTNBP2NL |         |
| EFNA3         | CUEDC1    |         |

|                 |                |
|-----------------|----------------|
| <i>EFR3A</i>    | <i>CUL2</i>    |
| <i>EG214403</i> | <i>CUL3</i>    |
| <i>EHD1</i>     | <i>CX3CL1</i>  |
| <i>EIF2AK4</i>  | <i>CX3CR1</i>  |
| <i>EIF2B2</i>   | <i>CXCL9</i>   |
| <i>EIF2B5</i>   | <i>CXCR7</i>   |
| <i>EIF2C2</i>   | <i>CXORF23</i> |
| <i>EIF2S1</i>   | <i>CXORF58</i> |
| <i>EIF3A</i>    | <i>CYB561</i>  |
| <i>EIF3B</i>    | <i>CYB5D1</i>  |
| <i>EIF3G</i>    | <i>CYBA</i>    |
| <i>EIF4E3</i>   | <i>CYBRD1</i>  |
| <i>EIF4G1</i>   | <i>CYFIP1</i>  |
| <i>EIF4G2</i>   | <i>CYHR1</i>   |
| <i>EIF4H</i>    | <i>CYP24A1</i> |
| <i>ELA1</i>     | <i>CYP2C9</i>  |
| <i>ELA2</i>     | <i>CYP2E1</i>  |
| <i>ELAVL1</i>   | <i>CYP2S1</i>  |
| <i>ELAVL2</i>   | <i>CYR1</i>    |
| <i>ELAVL4</i>   | <i>D2HGDH</i>  |
| <i>ELF4</i>     | <i>D4S234E</i> |
| <i>ELK3</i>     | <i>DAAM1</i>   |
| <i>ELL</i>      | <i>DACT1</i>   |
| <i>ELL2</i>     | <i>DAD1</i>    |
| <i>ELMO2</i>    | <i>DAPK1</i>   |
| <i>ELOVL4</i>   | <i>DAPK3</i>   |
| <i>ELOVL7</i>   | <i>DARC</i>    |
| <i>ELP4</i>     | <i>DAZAP2</i>  |
| <i>ELTD1</i>    | <i>DBC1</i>    |
| <i>EMB</i>      | <i>DBF4B</i>   |
| <i>EME1</i>     | <i>DBNL</i>    |
| <i>EMILIN3</i>  | <i>DCBLD2</i>  |
| <i>EML5</i>     | <i>DCUN1D5</i> |
| <i>EMX1</i>     | <i>DDEF1</i>   |
| <i>ENAH</i>     | <i>DDN</i>     |
| <i>ENO2</i>     | <i>DDX10</i>   |
| <i>ENPEP</i>    | <i>DDX39</i>   |
| <i>ENPP1</i>    | <i>DDX4</i>    |
| <i>ENSA</i>     | <i>DDX51</i>   |
| <i>ENTPD7</i>   | <i>DDX52</i>   |
| <i>EPC2</i>     | <i>DDX53</i>   |
| <i>EPDR1</i>    | <i>DDX56</i>   |
| <i>EPHA1</i>    | <i>DDX58</i>   |
| <i>EPHA7</i>    | <i>DEDD</i>    |
| <i>EPHA8</i>    | <i>DEF8</i>    |
| <i>EPN2</i>     | <i>DEFA6</i>   |

|                      |                 |
|----------------------|-----------------|
| <i>EPN3</i>          | <i>DEFB1</i>    |
| <i>EPO</i>           | <i>DEFB127</i>  |
| <i>EPS15</i>         | <i>DENND4A</i>  |
| <i>EPS8L1</i>        | <i>DEPDC1B</i>  |
| <i>EPYC</i>          | <i>DEPDC4</i>   |
| <i>ERC2</i>          | <i>DEPDC5</i>   |
| <i>ERCC4</i>         | <i>DERL3</i>    |
| <i>ERCC6</i>         | <i>DET1</i>     |
| <i>ERCC8</i>         | <i>DFFB</i>     |
| <i>ERG</i>           | <i>DGKE</i>     |
| <i>ERGIC3</i>        | <i>DGKH</i>     |
| <i>ERLIN1</i>        | <i>DGKQ</i>     |
| <i>ERN1</i>          | <i>DGKZ</i>     |
| <i>ERP29</i>         | <i>DHCR24</i>   |
| <i>ERRFI1</i>        | <i>DHRS13</i>   |
| <i>ESCO1</i>         | <i>DHRS3</i>    |
| <i>ESPN</i>          | <i>DHX30</i>    |
| <i>ESRRA</i>         | <i>DHX58</i>    |
| <i>ETAA1</i>         | <i>DICER1</i>   |
| <i>ETFB</i>          | <i>DIP2A</i>    |
| <i>ETHE1</i>         | <i>DIRAS2</i>   |
| <i>ETNK2</i>         | <i>DISC1</i>    |
| <i>ETS1</i>          | <i>DIXDC1</i>   |
| <i>EVI5L</i>         | <i>DKK2</i>     |
| <i>EVPL</i>          | <i>DLG1</i>     |
| <i>EXO1</i>          | <i>DLGAP2</i>   |
| <i>EXOC6</i>         | <i>DLK1</i>     |
| <i>EXOSC2</i>        | <i>DLST</i>     |
| <i>EXT2</i>          | <i>DMPK</i>     |
| <i>EXTL3</i>         | <i>DMRT2</i>    |
| <i>F11R</i>          | <i>DMRTA1</i>   |
| <i>F630043A04RIK</i> | <i>DMXL1</i>    |
| <i>F730047E07RIK</i> | <i>DNA2</i>     |
| <i>FA2H</i>          | <i>DNAI2</i>    |
| <i>FAH</i>           | <i>DNAJA1</i>   |
| <i>FAIM</i>          | <i>DNAJB11</i>  |
| <i>FAM170A</i>       | <i>DNAJB12</i>  |
| <i>FANCI</i>         | <i>DNAJC16</i>  |
| <i>FANCM</i>         | <i>DNAJC18</i>  |
| <i>FAP</i>           | <i>DNAJC3</i>   |
| <i>FASTKD3</i>       | <i>DNAJC4</i>   |
| <i>FAT4</i>          | <i>DNAJC5G</i>  |
| <i>FBN1</i>          | <i>DNAJC7</i>   |
| <i>FBP2</i>          | <i>DNASE1L2</i> |
| <i>FBXL12</i>        | <i>DNASE2</i>   |
| <i>FBXL18</i>        | <i>DNHD1</i>    |

|               |                |
|---------------|----------------|
| <i>FBXL2</i>  | <i>DNMT1</i>   |
| <i>FBXO11</i> | <i>DOCK2</i>   |
| <i>FBXO2</i>  | <i>DOCK5</i>   |
| <i>FBXO25</i> | <i>DOCK6</i>   |
| <i>FBXO30</i> | <i>DOCK7</i>   |
| <i>FBXO34</i> | <i>DOCK8</i>   |
| <i>FBXO6</i>  | <i>DOK2</i>    |
| <i>FBXW4</i>  | <i>DOK4</i>    |
| <i>FBXW5</i>  | <i>DOK6</i>    |
| <i>FBXW8</i>  | <i>DOLPP1</i>  |
| <i>FCER1A</i> | <i>DOT1L</i>   |
| <i>FCER2A</i> | <i>DPF1</i>    |
| <i>FCGR2B</i> | <i>DPH3</i>    |
| <i>FCNA</i>   | <i>DPH4</i>    |
| <i>FDFT1</i>  | <i>DPM2</i>    |
| <i>FECH</i>   | <i>DPM3</i>    |
| <i>FERMT1</i> | <i>DPP3</i>    |
| <i>FGD4</i>   | <i>DPPA4</i>   |
| <i>FGF12</i>  | <i>DR1</i>     |
| <i>FGF16</i>  | <i>DRD5</i>    |
| <i>FGF9</i>   | <i>DSCR10</i>  |
| <i>FGGY</i>   | <i>DSCR3</i>   |
| <i>FGL2</i>   | <i>DSCR4</i>   |
| <i>FHDC1</i>  | <i>DSG2</i>    |
| <i>FIGF</i>   | <i>DSG3</i>    |
| <i>FILIP1</i> | <i>DTWD1</i>   |
| <i>FKBP4</i>  | <i>DUS1L</i>   |
| <i>FLCN</i>   | <i>DUS2L</i>   |
| <i>FLNA</i>   | <i>DUSP10</i>  |
| <i>FLRT3</i>  | <i>DUSP13</i>  |
| <i>FLT1</i>   | <i>DUSP2</i>   |
| <i>FLVCR2</i> | <i>DUSP28</i>  |
| <i>FMO1</i>   | <i>DUSP8</i>   |
| <i>FMO4</i>   | <i>DUT</i>     |
| <i>FNBP4</i>  | <i>DVL2</i>    |
| <i>FNDC4</i>  | <i>DYDC1</i>   |
| <i>FNDC7</i>  | <i>DYX1C1</i>  |
| <i>FNTA</i>   | <i>DZIP1L</i>  |
| <i>FOLR2</i>  | <i>E2F1</i>    |
| <i>FOLR4</i>  | <i>EAPP</i>    |
| <i>FOXA2</i>  | <i>EBF2</i>    |
| <i>FOXD1</i>  | <i>EBI3</i>    |
| <i>FOXD2</i>  | <i>ECE2</i>    |
| <i>FOXI2</i>  | <i>EDAR</i>    |
| <i>FOXJ2</i>  | <i>EDARADD</i> |
| <i>FOXJ3</i>  | <i>EDG4</i>    |

|                |                 |
|----------------|-----------------|
| <i>FOXM1</i>   | <i>EDNRA</i>    |
| <i>FOXN1</i>   | <i>EED</i>      |
| <i>FOXRED1</i> | <i>EEF1A1</i>   |
| <i>FPGT</i>    | <i>EEPD1</i>    |
| <i>FREM1</i>   | <i>EFCAB4A</i>  |
| <i>FREM2</i>   | <i>EFCAB4B</i>  |
| <i>FRMD8</i>   | <i>EFCAB5</i>   |
| <i>FRMPD1</i>  | <i>EFHD1</i>    |
| <i>FRRS1</i>   | <i>EFTUD1</i>   |
| <i>FSCN1</i>   | <i>EHBP1L1</i>  |
| <i>FSD1</i>    | <i>EHD1</i>     |
| <i>FTL1</i>    | <i>EHD4</i>     |
| <i>FUK</i>     | <i>EIF2AK1</i>  |
| <i>FURIN</i>   | <i>EIF2B2</i>   |
| <i>FUT7</i>    | <i>EIF2B5</i>   |
| <i>FUT8</i>    | <i>EIF2C4</i>   |
| <i>FUT9</i>    | <i>EIF3A</i>    |
| <i>FXC1</i>    | <i>EIF3B</i>    |
| <i>FXYD3</i>   | <i>EIF3G</i>    |
| <i>FXYD6</i>   | <i>ELAVL2</i>   |
| <i>FZD3</i>    | <i>ELMOD1</i>   |
| <i>From</i>    | <i>ELMOD2</i>   |
| <i>G0S2</i>    | <i>ELOVL1</i>   |
| <i>G3BP2</i>   | <i>ELOVL2</i>   |
| <i>GABPA</i>   | <i>EMCN</i>     |
| <i>GABPB2</i>  | <i>EME1</i>     |
| <i>GABRA1</i>  | <i>EMG1</i>     |
| <i>GABRA3</i>  | <i>EMID1</i>    |
| <i>GABRB1</i>  | <i>EML5</i>     |
| <i>GABRD</i>   | <i>EMP1</i>     |
| <i>GABRG2</i>  | <i>EMR1</i>     |
| <i>GABRG3</i>  | <i>EMX1</i>     |
| <i>GADD45A</i> | <i>EN2</i>      |
| <i>GAK</i>     | <i>ENAM</i>     |
| <i>GALNT1</i>  | <i>ENO1</i>     |
| <i>GALNT2</i>  | <i>ENOPH1</i>   |
| <i>GALNT3</i>  | <i>ENPP4</i>    |
| <i>GALNT7</i>  | <i>ENPP5</i>    |
| <i>GALNTL1</i> | <i>ENTPD1</i>   |
| <i>GALR1</i>   | <i>ENTPD6</i>   |
| <i>GALR3</i>   | <i>EPAS1</i>    |
| <i>GAMT</i>    | <i>EPB41L4B</i> |
| <i>GARS</i>    | <i>EPC1</i>     |
| <i>GAS2</i>    | <i>EPC2</i>     |
| <i>GBL</i>     | <i>EPHA1</i>    |
| <i>GCAT</i>    | <i>EPHA7</i>    |

|                 |                |
|-----------------|----------------|
| <i>GCDH</i>     | <i>EPHX2</i>   |
| <i>GCK</i>      | <i>EPS15L1</i> |
| <i>GCLC</i>     | <i>ERAP1</i>   |
| <i>GDF6</i>     | <i>ERBB4</i>   |
| <i>GDF9</i>     | <i>ERCC2</i>   |
| <i>GDPD2</i>    | <i>ERCC5</i>   |
| <i>GFM2</i>     | <i>ERLIN1</i>  |
| <i>GGA3</i>     | <i>ERMP1</i>   |
| <i>GGCT</i>     | <i>ERRFI1</i>  |
| <i>GGT1</i>     | <i>ESCO1</i>   |
| <i>GIGYF2</i>   | <i>ESF1</i>    |
| <i>GIMAP7</i>   | <i>ESRRA</i>   |
| <i>GIN1</i>     | <i>ETF1</i>    |
| <i>GIYD2</i>    | <i>ETFB</i>    |
| <i>GJB3</i>     | <i>ETFDH</i>   |
| <i>GJB5</i>     | <i>ETS1</i>    |
| <i>GJC1</i>     | <i>ETV5</i>    |
| <i>GJD4</i>     | <i>EVI5L</i>   |
| <i>GLB1L2</i>   | <i>EVPL</i>    |
| <i>GLCE</i>     | <i>EXDL2</i>   |
| <i>GLDC</i>     | <i>EXOC3L2</i> |
| <i>GLIPR1L2</i> | <i>EXOC4</i>   |
| <i>GLTSCR1</i>  | <i>EXOSC1</i>  |
| <i>GM128</i>    | <i>EXOSC10</i> |
| <i>GM1568</i>   | <i>F9</i>      |
| <i>GM1673</i>   | <i>FA2H</i>    |
| <i>GM1679</i>   | <i>FABP3</i>   |
| <i>GM266</i>    | <i>FAH</i>     |
| <i>GM561</i>    | <i>FAM101A</i> |
| <i>GM806</i>    | <i>FAM109A</i> |
| <i>GM813</i>    | <i>FAM109B</i> |
| <i>GM962</i>    | <i>FAM110A</i> |
| <i>GMEB1</i>    | <i>FAM123B</i> |
| <i>GMEB2</i>    | <i>FAM134C</i> |
| <i>GMFB</i>     | <i>FAM13A1</i> |
| <i>GMNN</i>     | <i>FAM19A2</i> |
| <i>GMPPB</i>    | <i>FAM20A</i>  |
| <i>GMPR2</i>    | <i>FAM20B</i>  |
| <i>GNA12</i>    | <i>FAM24A</i>  |
| <i>GNAI2</i>    | <i>FAM26E</i>  |
| <i>GNAI3</i>    | <i>FAM49A</i>  |
| <i>GNAO1</i>    | <i>FAM57A</i>  |
| <i>GNAT1</i>    | <i>FAM58A</i>  |
| <i>GNAT2</i>    | <i>FAM63A</i>  |
| <i>GNAZ</i>     | <i>FAM71F1</i> |
| <i>GNE</i>      | <i>FAM73B</i>  |

|                |               |
|----------------|---------------|
| <i>GNG4</i>    | <i>FAM76A</i> |
| <i>GNPAT</i>   | <i>FAM81B</i> |
| <i>GNRH1</i>   | <i>FAM82C</i> |
| <i>GNS</i>     | <i>FAM83H</i> |
| <i>GOLGA1</i>  | <i>FAP</i>    |
| <i>GOLGA4</i>  | <i>FARSA</i>  |
| <i>GOSR2</i>   | <i>FAS</i>    |
| <i>GP2</i>     | <i>FBLIM1</i> |
| <i>GPATCH3</i> | <i>FBXL13</i> |
| <i>GPC5</i>    | <i>FBXL15</i> |
| <i>GPD2</i>    | <i>FBXL4</i>  |
| <i>GPER</i>    | <i>FBXL8</i>  |
| <i>GPI1</i>    | <i>FBXO10</i> |
| <i>GPM6A</i>   | <i>FBXO16</i> |
| <i>GPR126</i>  | <i>FBXO27</i> |
| <i>GPR137B</i> | <i>FBXO39</i> |
| <i>GPR146</i>  | <i>FBXO41</i> |
| <i>GPR156</i>  | <i>FBXO42</i> |
| <i>GPR162</i>  | <i>FBXO7</i>  |
| <i>GPR174</i>  | <i>FBXW5</i>  |
| <i>GPR26</i>   | <i>FCER2</i>  |
| <i>GPR4</i>    | <i>FCN1</i>   |
| <i>GPR44</i>   | <i>FCN3</i>   |
| <i>GPR45</i>   | <i>FCRL1</i>  |
| <i>GPR56</i>   | <i>FCRL2</i>  |
| <i>GPR64</i>   | <i>FDFT1</i>  |
| <i>GPRC5A</i>  | <i>FECH</i>   |
| <i>GPSM3</i>   | <i>FES</i>    |
| <i>GPT2</i>    | <i>FETUB</i>  |
| <i>GPX7</i>    | <i>FEV</i>    |
| <i>GRB7</i>    | <i>FFAR2</i>  |
| <i>GRCC10</i>  | <i>FGF17</i>  |
| <i>GREB1</i>   | <i>FGF2</i>   |
| <i>GREM1</i>   | <i>FGFR2</i>  |
| <i>GRHPR</i>   | <i>FGFR3</i>  |
| <i>GRID2IP</i> | <i>FGGY</i>   |
| <i>GRIT</i>    | <i>FGL1</i>   |
| <i>GRK5</i>    | <i>FHL2</i>   |
| <i>GRM3</i>    | <i>FKBP15</i> |
| <i>GSDMD</i>   | <i>FKBP1B</i> |
| <i>GSTA1</i>   | <i>FLRT2</i>  |
| <i>GSTA2</i>   | <i>FLVCR2</i> |
| <i>GSTM5</i>   | <i>FMO1</i>   |
| <i>GSTO1</i>   | <i>FMO5</i>   |
| <i>GTF2A1</i>  | <i>FMOD</i>   |
| <i>GTF2E1</i>  | <i>FMR1NB</i> |



|                  |                     |
|------------------|---------------------|
| <i>GTF2E2</i>    | <i>FNBP1L</i>       |
| <i>GTF2H3</i>    | <i>FNDC3A</i>       |
| <i>GTF2H4</i>    | <i>FNDC4</i>        |
| <i>GTF3C1</i>    | <i>FNTA</i>         |
| <i>GYPK</i>      | <i>FOXC1</i>        |
| <i>GYS1</i>      | <i>FOXD1</i>        |
| <i>GZF1</i>      | <i>FOXJ2</i>        |
| <i>H2-EB1</i>    | <i>FOXK1</i>        |
| <i>H2-M3</i>     | <i>FOXO1</i>        |
| <i>H2-Q7</i>     | <i>FRG2C</i>        |
| <i>H2-T22</i>    | <i>FRMD4B</i>       |
| <i>H2AFY</i>     | <i>FRMD6</i>        |
| <i>H3F3B</i>     | <i>FSCN1</i>        |
| <i>HAGH</i>      | <i>FSHR</i>         |
| <i>HAS2</i>      | <i>FSTL3</i>        |
| <i>HAVCR2</i>    | <i>FTL</i>          |
| <i>HBA-A1</i>    | <i>FUK</i>          |
| <i>HBQ1</i>      | <i>FUNDC1</i>       |
| <i>HCRT</i>      | <i>FURIN</i>        |
| <i>HDAC10</i>    | <i>FUS</i>          |
| <i>HDAC6</i>     | <i>FUT8</i>         |
| <i>HDAC8</i>     | <i>FXC1</i>         |
| <i>HDDC2</i>     | <i>From</i>         |
| <i>HDGF</i>      | <i>G6PC</i>         |
| <i>HDGFL1</i>    | <i>G6PC3</i>        |
| <i>HDHD1A</i>    | <i>G6PD</i>         |
| <i>HDLBP</i>     | <i>GABBR2</i>       |
| <i>HEBP2</i>     | <i>GABPB2</i>       |
| <i>HELZ</i>      | <i>GABRA3</i>       |
| <i>HERPUD2</i>   | <i>GABRA6</i>       |
| <i>HES1</i>      | <i>GABRG3</i>       |
| <i>HEXB</i>      | <i>GABRQ</i>        |
| <i>HEY1</i>      | <i>GABRR2</i>       |
| <i>HGFAC</i>     | <i>GADD45A</i>      |
| <i>HHAT</i>      | <i>GADD45G</i>      |
| <i>HHIP</i>      | <i>GALM</i>         |
| <i>HIGD1C</i>    | <i>GALNAC4S-6ST</i> |
| <i>HIP2</i>      | <i>GALNT1</i>       |
| <i>HIPK3</i>     | <i>GALNT12</i>      |
| <i>HIRA</i>      | <i>GALNT3</i>       |
| <i>HIST2H2BE</i> | <i>GALNT7</i>       |
| <i>HLCS</i>      | <i>GART</i>         |
| <i>HLX</i>       | <i>GAS2L1</i>       |
| <i>HMG20A</i>    | <i>GAS8</i>         |
| <i>HMG20B</i>    | <i>GATA2</i>        |
| <i>HMOX1</i>     | <i>GATA5</i>        |

|                 |                 |
|-----------------|-----------------|
| <i>HNRNPUL2</i> | <i>GATA6</i>    |
| <i>HOXA1</i>    | <i>GBA3</i>     |
| <i>HOXC8</i>    | <i>GBL</i>      |
| <i>HOXD12</i>   | <i>GCA</i>      |
| <i>HOXD13</i>   | <i>GCET2</i>    |
| <i>HPS4</i>     | <i>GCG</i>      |
| <i>HPSE</i>     | <i>GCLM</i>     |
| <i>HPSE2</i>    | <i>GCNT2</i>    |
| <i>HRASLS</i>   | <i>GDE1</i>     |
| <i>HRASLS5</i>  | <i>GDF11</i>    |
| <i>HS2ST1</i>   | <i>GDI2</i>     |
| <i>HS3ST1</i>   | <i>GFER</i>     |
| <i>HSD11B1</i>  | <i>GFI1</i>     |
| <i>HSD17B12</i> | <i>GGT5</i>     |
| <i>HSD17B7</i>  | <i>GHDC</i>     |
| <i>HSD3B1</i>   | <i>GIGYF1</i>   |
| <i>HSD3B2</i>   | <i>GIN1</i>     |
| <i>HSD3B5</i>   | <i>GIN54</i>    |
| <i>HSD3B6</i>   | <i>GJA5</i>     |
| <i>HSD3B7</i>   | <i>GJB3</i>     |
| <i>HSDL1</i>    | <i>GJB5</i>     |
| <i>HSDL2</i>    | <i>GK</i>       |
| <i>HSPA1B</i>   | <i>GKN2</i>     |
| <i>HSPA4</i>    | <i>GLCCI1</i>   |
| <i>HSPA5</i>    | <i>GLDC</i>     |
| <i>HTRA1</i>    | <i>GLG1</i>     |
| <i>HUS1</i>     | <i>GLI4</i>     |
| <i>HVCN1</i>    | <i>GLIPR1L1</i> |
| <i>HYAL2</i>    | <i>GLIS2</i>    |
| <i>HYAL5</i>    | <i>GLP1R</i>    |
| <i>HYOU1</i>    | <i>GLRX</i>     |
| <i>IBTK</i>     | <i>GLRX5</i>    |
| <i>ICMT</i>     | <i>GLT8D3</i>   |
| <i>IDH1</i>     | <i>GLUD2</i>    |
| <i>IDI1</i>     | <i>GLULD1</i>   |
| <i>IFI47</i>    | <i>GLYCTK</i>   |
| <i>IFITM6</i>   | <i>GMFB</i>     |
| <i>IFLTD1</i>   | <i>GMIP</i>     |
| <i>IFNAR2</i>   | <i>GML</i>      |
| <i>IFNG</i>     | <i>GNAI2</i>    |
| <i>IFNGR1</i>   | <i>GNB4</i>     |
| <i>IFNK</i>     | <i>GNE</i>      |
| <i>IFRG15</i>   | <i>GNG2</i>     |
| <i>IFT140</i>   | <i>GNG7</i>     |
| <i>IGF2R</i>    | <i>GNPDA1</i>   |
| <i>IGFALS</i>   | <i>GOLGA1</i>   |

|                |                |
|----------------|----------------|
| <i>IGFBP4</i>  | <i>GOLGA8A</i> |
| <i>IHPK3</i>   | <i>GOLPH3L</i> |
| <i>IKBKE</i>   | <i>GOLT1A</i>  |
| <i>IKZF3</i>   | <i>GP9</i>     |
| <i>IKZF5</i>   | <i>GPATCH3</i> |
| <i>IL12RB1</i> | <i>GPBAR1</i>  |
| <i>IL17RA</i>  | <i>GPC6</i>    |
| <i>IL17RD</i>  | <i>GPD1</i>    |
| <i>IL19</i>    | <i>GPKOW</i>   |
| <i>IL1A</i>    | <i>GPM6A</i>   |
| <i>IL1RAP</i>  | <i>GPR103</i>  |
| <i>IL21</i>    | <i>GPR108</i>  |
| <i>IL21R</i>   | <i>GPR125</i>  |
| <i>IL23R</i>   | <i>GPR132</i>  |
| <i>IL25</i>    | <i>GPR137</i>  |
| <i>IL28RA</i>  | <i>GPR137B</i> |
| <i>IL31RA</i>  | <i>GPR171</i>  |
| <i>IL6RA</i>   | <i>GPR180</i>  |
| <i>IL8RB</i>   | <i>GPR19</i>   |
| <i>ILF3</i>    | <i>GPR20</i>   |
| <i>ING1</i>    | <i>GPR26</i>   |
| <i>ING3</i>    | <i>GPR61</i>   |
| <i>ING5</i>    | <i>GPR63</i>   |
| <i>INHBE</i>   | <i>GPR64</i>   |
| <i>INPP5A</i>  | <i>GPR92</i>   |
| <i>INPP5D</i>  | <i>GPR98</i>   |
| <i>INPP5E</i>  | <i>GPS2</i>    |
| <i>INVS</i>    | <i>GPSM3</i>   |
| <i>IQCE</i>    | <i>GPT2</i>    |
| <i>IQCG</i>    | <i>GPX7</i>    |
| <i>IRF2BP1</i> | <i>GRAMD1C</i> |
| <i>IRS3</i>    | <i>GRB7</i>    |
| <i>IRS4</i>    | <i>GREM2</i>   |
| <i>ISG20</i>   | <i>GRHL1</i>   |
| <i>ISG20L2</i> | <i>GRIA3</i>   |
| <i>ISLR2</i>   | <i>GRIK5</i>   |
| <i>ITCH</i>    | <i>GRIP1</i>   |
| <i>ITFG1</i>   | <i>GRM3</i>    |
| <i>ITGA11</i>  | <i>GRM5</i>    |
| <i>ITGA2B</i>  | <i>GRM8</i>    |
| <i>ITGA8</i>   | <i>GRWD1</i>   |
| <i>ITGAX</i>   | <i>GSK3B</i>   |
| <i>ITGB2</i>   | <i>GSTK1</i>   |
| <i>ITGBL1</i>  | <i>GSTO1</i>   |
| <i>ITK</i>     | <i>GTF2B</i>   |
| <i>ITLN1</i>   | <i>GTF2H5</i>  |

|               |                |
|---------------|----------------|
| <i>ITPKC</i>  | <i>GTF3A</i>   |
| <i>ITPR2</i>  | <i>GTF3C1</i>  |
| <i>ITSN1</i>  | <i>GTF3C3</i>  |
| <i>ITSN2</i>  | <i>GTF3C4</i>  |
| <i>JAG1</i>   | <i>GTPBP2</i>  |
| <i>JDP2</i>   | <i>GTSF1L</i>  |
| <i>JMJD2A</i> | <i>GUCY1B3</i> |
| <i>JOSD1</i>  | <i>GUCY2C</i>  |
| <i>JPH3</i>   | <i>GUF1</i>    |
| <i>JRK</i>    | <i>GYLTL1B</i> |
| <i>JUB</i>    | <i>GYPB</i>    |
| <i>JUP</i>    | <i>GZF1</i>    |
| <i>KCNA1</i>  | <i>GZMA</i>    |
| <i>KCNAB3</i> | <i>GZMB</i>    |
| <i>KCNE1L</i> | <i>GZMM</i>    |
| <i>KCNF1</i>  | <i>H2AFY2</i>  |
| <i>KCNG4</i>  | <i>H3F3B</i>   |
| <i>KCNIP4</i> | <i>H6PD</i>    |
| <i>KCNJ11</i> | <i>HACE1</i>   |
| <i>KCNJ8</i>  | <i>HACL1</i>   |
| <i>KCNK3</i>  | <i>HADH</i>    |
| <i>KCNMB2</i> | <i>HAO1</i>    |
| <i>KCNN3</i>  | <i>HAO2</i>    |
| <i>KCNN4</i>  | <i>HAPLN2</i>  |
| <i>KCNQ5</i>  | <i>HARS</i>    |
| <i>KCNS2</i>  | <i>HBG2</i>    |
| <i>KCNT1</i>  | <i>HBS1L</i>   |
| <i>KCNV1</i>  | <i>HCCA2</i>   |
| <i>KCTD13</i> | <i>HCRT</i>    |
| <i>KCTD15</i> | <i>HCST</i>    |
| <i>KCTD3</i>  | <i>HDAC1</i>   |
| <i>KCTD5</i>  | <i>HDAC5</i>   |
| <i>KDELR2</i> | <i>HDAC8</i>   |
| <i>KDELR3</i> | <i>HDC</i>     |
| <i>KDSR</i>   | <i>HEBP1</i>   |
| <i>KIF13A</i> | <i>HELZ</i>    |
| <i>KIF17</i>  | <i>HEPACAM</i> |
| <i>KIF19A</i> | <i>HERPUD2</i> |
| <i>KIF2C</i>  | <i>HES6</i>    |
| <i>KIF5C</i>  | <i>HEY1</i>    |
| <i>KLC1</i>   | <i>HEY2</i>    |
| <i>KLC2</i>   | <i>HGS</i>     |
| <i>KLC3</i>   | <i>HGSNAT</i>  |
| <i>KLF11</i>  | <i>HIC1</i>    |
| <i>KLF12</i>  | <i>HIF1AN</i>  |
| <i>KLF9</i>   | <i>HIGD1A</i>  |

|                  |                  |
|------------------|------------------|
| <i>KLHDC8A</i>   | <i>HIP1R</i>     |
| <i>KLHDC8B</i>   | <i>HISPPD1</i>   |
| <i>KLHL10</i>    | <i>HIST1H2AK</i> |
| <i>KLHL20</i>    | <i>HIST1H4D</i>  |
| <i>KLHL24</i>    | <i>HIST2H2BE</i> |
| <i>KPNA3</i>     | <i>HLA-A</i>     |
| <i>KPRP</i>      | <i>HLA-B</i>     |
| <i>KRBA1</i>     | <i>HLA-C</i>     |
| <i>KRR1</i>      | <i>HLA-DQA1</i>  |
| <i>KRT12</i>     | <i>HLA-DQB1</i>  |
| <i>KRT14</i>     | <i>HLX</i>       |
| <i>KRT15</i>     | <i>HMBOX1</i>    |
| <i>KRT17</i>     | <i>HMCN1</i>     |
| <i>KRT32</i>     | <i>HMG2L1</i>    |
| <i>KRT34</i>     | <i>HMGCS1</i>    |
| <i>KRTAP16-7</i> | <i>HMGN3</i>     |
| <i>KRTAP26-1</i> | <i>HMOX1</i>     |
| <i>KRTDAP</i>    | <i>HNRNPA2B1</i> |
| <i>KTI12</i>     | <i>HNRPA3</i>    |
| <i>KY</i>        | <i>HOMER1</i>    |
| <i>L7RN6</i>     | <i>HOMER3</i>    |
| <i>LACTB</i>     | <i>HOPX</i>      |
| <i>LAGE3</i>     | <i>HORMAD1</i>   |
| <i>LAMB2</i>     | <i>HOXA1</i>     |
| <i>LAMC3</i>     | <i>HOXA13</i>    |
| <i>LANCL3</i>    | <i>HOXA6</i>     |
| <i>LBR</i>       | <i>HOXB2</i>     |
| <i>LBX2</i>      | <i>HOXB4</i>     |
| <i>LCE1B</i>     | <i>HOXC13</i>    |
| <i>LCE1L</i>     | <i>HPS4</i>      |
| <i>LCK</i>       | <i>HPS5</i>      |
| <i>LCN12</i>     | <i>HPSE2</i>     |
| <i>LCOR</i>      | <i>HRB</i>       |
| <i>LCORL</i>     | <i>HS6ST2</i>    |
| <i>LEF1</i>      | <i>HSD11B2</i>   |
| <i>LEFTY1</i>    | <i>HSD17B6</i>   |
| <i>LEFTY2</i>    | <i>HSD3B2</i>    |
| <i>LENG1</i>     | <i>HSF2BP</i>    |
| <i>LEPRE1</i>    | <i>HSPA1B</i>    |
| <i>LGI1</i>      | <i>HSPB6</i>     |
| <i>LGI3</i>      | <i>HSPBP1</i>    |
| <i>LHCGR</i>     | <i>HTATIP</i>    |
| <i>LHX3</i>      | <i>HTN1</i>      |
| <i>LHX8</i>      | <i>HTN3</i>      |
| <i>LIF</i>       | <i>HTR1F</i>     |
| <i>LIG4</i>      | <i>HTR3A</i>     |

|                |                 |
|----------------|-----------------|
| <i>LIMCH1</i>  | <i>HTR3B</i>    |
| <i>LIMD1</i>   | <i>HTRA2</i>    |
| <i>LIMK1</i>   | <i>HTT</i>      |
| <i>LIN28</i>   | <i>HUS1</i>     |
| <i>LINGO3</i>  | <i>ICAM3</i>    |
| <i>LIPC</i>    | <i>ICOSLG</i>   |
| <i>LIPE</i>    | <i>IDH3G</i>    |
| <i>LIPF</i>    | <i>IFI35</i>    |
| <i>LIPH</i>    | <i>IFITM2</i>   |
| <i>LIPI</i>    | <i>IFNA21</i>   |
| <i>LMAN2L</i>  | <i>IFT140</i>   |
| <i>LMBR1</i>   | <i>IFT74</i>    |
| <i>LMBR1L</i>  | <i>IGFBP7</i>   |
| <i>LMNB2</i>   | <i>IGSF21</i>   |
| <i>LMOD1</i>   | <i>IGSF5</i>    |
| <i>LMTK2</i>   | <i>IHPK3</i>    |
| <i>LNX2</i>    | <i>IKIP</i>     |
| <i>LOXL2</i>   | <i>IKZF2</i>    |
| <i>LOXL3</i>   | <i>IKZF3</i>    |
| <i>LPAR3</i>   | <i>IKZF4</i>    |
| <i>LPO</i>     | <i>IL12A</i>    |
| <i>LPP</i>     | <i>IL12RB2</i>  |
| <i>LRCH1</i>   | <i>IL15</i>     |
| <i>LRCH3</i>   | <i>IL17RD</i>   |
| <i>LRIG1</i>   | <i>IL17RE</i>   |
| <i>LRP2BP</i>  | <i>IL1A</i>     |
| <i>LRP4</i>    | <i>IL1F10</i>   |
| <i>LRRC14</i>  | <i>IL1F9</i>    |
| <i>LRRC15</i>  | <i>IL1RAPL2</i> |
| <i>LRRC23</i>  | <i>IL1RL1</i>   |
| <i>LRRC36</i>  | <i>IL21R</i>    |
| <i>LRRC52</i>  | <i>IL5RA</i>    |
| <i>LRRC55</i>  | <i>IL8RB</i>    |
| <i>LRRC56</i>  | <i>ILDR1</i>    |
| <i>LRRFIP2</i> | <i>IMMP2L</i>   |
| <i>LRRK2</i>   | <i>IMPACT</i>   |
| <i>LRRN2</i>   | <i>ING2</i>     |
| <i>LSG1</i>    | <i>INHBB</i>    |
| <i>LTB4R1</i>  | <i>INPP4A</i>   |
| <i>LTF</i>     | <i>INPP5B</i>   |
| <i>LUC7L</i>   | <i>INSC</i>     |
| <i>LUZP1</i>   | <i>INSIG1</i>   |
| <i>LYNX1</i>   | <i>INTS7</i>    |
| <i>LYRM4</i>   | <i>INTS9</i>    |
| <i>LYRM5</i>   | <i>INVS</i>     |
| <i>LYSMD1</i>  | <i>IQCB1</i>    |

|                  |                 |
|------------------|-----------------|
| <i>LYSMD2</i>    | <i>IQUB</i>     |
| <i>LYZL6</i>     | <i>IRAK1BP1</i> |
| <i>LZTS2</i>     | <i>IRAK3</i>    |
| <i>MAB21L1</i>   | <i>IRF2BP1</i>  |
| <i>MACROD2</i>   | <i>IRF5</i>     |
| <i>MAF</i>       | <i>IRS2</i>     |
| <i>MAF1</i>      | <i>IRX4</i>     |
| <i>MAFB</i>      | <i>ITGA10</i>   |
| <i>MAGI3</i>     | <i>ITGA11</i>   |
| <i>MAK</i>       | <i>ITGA3</i>    |
| <i>MAL</i>       | <i>ITGB1BP3</i> |
| <i>MAN1B1</i>    | <i>ITGB3</i>    |
| <i>MAN1C1</i>    | <i>ITIH1</i>    |
| <i>MAN2C1</i>    | <i>ITPR2</i>    |
| <i>MAP1LC3A</i>  | <i>ITPR3</i>    |
| <i>MAP2K4</i>    | <i>ITSN2</i>    |
| <i>MAP3K12</i>   | <i>IVD</i>      |
| <i>MAP3K14</i>   | <i>JAG1</i>     |
| <i>MAP3K2</i>    | <i>JAKMIP2</i>  |
| <i>MAP3K3</i>    | <i>JAM3</i>     |
| <i>MAP3K7IP1</i> | <i>JMJD1A</i>   |
| <i>MAP3K7IP2</i> | <i>JMJD2B</i>   |
| <i>MAP3K7IP3</i> | <i>KALRN</i>    |
| <i>MAPK3</i>     | <i>KARS</i>     |
| <i>MAPK4</i>     | <i>KATNAL1</i>  |
| <i>MAPKAPK2</i>  | <i>KATNB1</i>   |
| <i>MARCH4</i>    | <i>KCMF1</i>    |
| <i>MARCKS</i>    | <i>KCNA1</i>    |
| <i>MARE</i>      | <i>KCNA2</i>    |
| <i>MARVELD2</i>  | <i>KCNB2</i>    |
| <i>MAS1</i>      | <i>KCNC3</i>    |
| <i>MASTL</i>     | <i>KCNE1L</i>   |
| <i>MAT2A</i>     | <i>KCNF1</i>    |
| <i>MBL1</i>      | <i>KCNG1</i>    |
| <i>MBOAT1</i>    | <i>KCNH1</i>    |
| <i>MC3R</i>      | <i>KCNH4</i>    |
| <i>MCART6</i>    | <i>KCNH8</i>    |
| <i>MCM7</i>      | <i>KCNIP4</i>   |
| <i>MCOLN2</i>    | <i>KCNJ11</i>   |
| <i>MCPT8</i>     | <i>KCNK10</i>   |
| <i>MED1</i>      | <i>KCNK3</i>    |
| <i>MED20</i>     | <i>KCNK9</i>    |
| <i>MED22</i>     | <i>KCNMA1</i>   |
| <i>MED6</i>      | <i>KCNN3</i>    |
| <i>MED8</i>      | <i>KCNQ5</i>    |
| <i>MED9</i>      | <i>KCNS1</i>    |

|                |                  |
|----------------|------------------|
| <i>MEIG1</i>   | <i>KCTD13</i>    |
| <i>MEIS2</i>   | <i>KCTD5</i>     |
| <i>MESDC2</i>  | <i>KDELR2</i>    |
| <i>METRN</i>   | <i>KDELR3</i>    |
| <i>METTL3</i>  | <i>KIAA0133</i>  |
| <i>METTL9</i>  | <i>KIAA0174</i>  |
| <i>MFAP3</i>   | <i>KIAA0241</i>  |
| <i>MFAP4</i>   | <i>KIAA0247</i>  |
| <i>MFF</i>     | <i>KIAA0284</i>  |
| <i>MFSD1</i>   | <i>KIAA0317</i>  |
| <i>MFSD2</i>   | <i>KIAA0355</i>  |
| <i>MFSD8</i>   | <i>KIAA0556</i>  |
| <i>MGAT4A</i>  | <i>KIAA0586</i>  |
| <i>MGAT5B</i>  | <i>KIAA0652</i>  |
| <i>MGST2</i>   | <i>KIAA0664</i>  |
| <i>MGST3</i>   | <i>KIAA0754</i>  |
| <i>MICAL1</i>  | <i>KIAA1147</i>  |
| <i>MICAL2</i>  | <i>KIAA1274</i>  |
| <i>MIR16</i>   | <i>KIAA1279</i>  |
| <i>MITD1</i>   | <i>KIAA1324L</i> |
| <i>MIXL1</i>   | <i>KIAA1383</i>  |
| <i>MKI67IP</i> | <i>KIAA1409</i>  |
| <i>MKL2</i>    | <i>KIAA1429</i>  |
| <i>MKRN1</i>   | <i>KIAA1430</i>  |
| <i>MKRN2</i>   | <i>KIAA1530</i>  |
| <i>MKRN3</i>   | <i>KIAA1576</i>  |
| <i>MLXIP</i>   | <i>KIAA1600</i>  |
| <i>MLYCD</i>   | <i>KIAA1755</i>  |
| <i>MMAB</i>    | <i>KIAA1797</i>  |
| <i>MMD</i>     | <i>KIAA1804</i>  |
| <i>MMP1B</i>   | <i>KIF16B</i>    |
| <i>MMP9</i>    | <i>KIF18A</i>    |
| <i>MMS19</i>   | <i>KIF1B</i>     |
| <i>MN1</i>     | <i>KIF23</i>     |
| <i>MND1</i>    | <i>KIF5A</i>     |
| <i>MOBKL1A</i> | <i>KIF5C</i>     |
| <i>MOBKL2B</i> | <i>KISS1</i>     |
| <i>MON1B</i>   | <i>KIT</i>       |
| <i>MON2</i>    | <i>KLC1</i>      |
| <i>MORN3</i>   | <i>KLC3</i>      |
| <i>MORN5</i>   | <i>KLC4</i>      |
| <i>MOV10L1</i> | <i>KLF15</i>     |
| <i>MPDU1</i>   | <i>KLF4</i>      |
| <i>MPP1</i>    | <i>KLF5</i>      |
| <i>MPP2</i>    | <i>KLF6</i>      |
| <i>MPRIP</i>   | <i>KLF8</i>      |



|         |           |
|---------|-----------|
| MPZL2   | KLHDC3    |
| MREG    | KLHDC8B   |
| MRGPRA4 | KLHL10    |
| MRM1    | KLHL17    |
| MRP63   | KLK13     |
| MRPL17  | KLKBL4    |
| MRPL18  | KLRK1     |
| MRPL21  | KRAS      |
| MRPL24  | KRR1      |
| MRPL36  | KRT16     |
| MRPS16  | KRT20     |
| MRPS17  | KRT33B    |
| MRPS2   | KRT34     |
| MRPS6   | KRT6C     |
| MRPS7   | KRT73     |
| MRPS9   | KRT75     |
| MRRF    | KRT76     |
| MTA2    | KRT80     |
| MTAP    | KRT85     |
| MTCH2   | KRT86     |
| MTDH    | KRTAP1-3  |
| MTFR1   | KRTAP1-5  |
| MTHFD1  | KRTAP11-1 |
| MTHFD1L | KRTAP4-4  |
| MTMR4   | KRTAP4-5  |
| MTRF1   | KRTAP9-3  |
| MTSS1   | KRTAP9-4  |
| MTTP    | KSR1      |
| MTUS1   | KYNU      |
| MTVR2   | LAIR2     |
| MTX1    | LALBA     |
| MUC1    | LAMB2     |
| MUC15   | LAMC3     |
| MUC5AC  | LASS3     |
| MYBL2   | LASS6     |
| MYCT1   | LBX1      |
| MYH14   | LCK       |
| MYH3    | LCN2      |
| MYH8    | LCP2      |
| MYL1    | LCT       |
| MYLK    | LDB1      |
| MYO10   | LDB3      |
| MYO1D   | LDOC1L    |
| MYO1F   | LELP1     |
| MYO5B   | LEMD1     |
| MYOM1   | LEPREL2   |

|                |                  |
|----------------|------------------|
| <i>MYRIP</i>   | <i>LEPROTL1</i>  |
| <i>MYST1</i>   | <i>LFNG</i>      |
| <i>MZF1</i>    | <i>LGI1</i>      |
| <i>N28178</i>  | <i>LGI3</i>      |
| <i>NAB2</i>    | <i>LHCGR</i>     |
| <i>NADK</i>    | <i>LHX5</i>      |
| <i>NAGPA</i>   | <i>LHX8</i>      |
| <i>NANP</i>    | <i>LIG3</i>      |
| <i>NAP1L3</i>  | <i>LIMCH1</i>    |
| <i>NAPB</i>    | <i>LIMS1</i>     |
| <i>NAT1</i>    | <i>LIN54</i>     |
| <i>NAT14</i>   | <i>LIPE</i>      |
| <i>NAV1</i>    | <i>LIPI</i>      |
| <i>NCAM2</i>   | <i>LITAF</i>     |
| <i>NCAPG2</i>  | <i>LMBR1L</i>    |
| <i>NCBP1</i>   | <i>LMLN</i>      |
| <i>NCK1</i>    | <i>LMTK3</i>     |
| <i>NCKAP1L</i> | <i>LOC642587</i> |
| <i>NCKIPSD</i> | <i>LOC643923</i> |
| <i>NCLN</i>    | <i>LOX</i>       |
| <i>NCOA2</i>   | <i>LOXL4</i>     |
| <i>NCOR2</i>   | <i>LPCAT1</i>    |
| <i>NDFIP1</i>  | <i>LPCAT2</i>    |
| <i>NDRG4</i>   | <i>LPHN3</i>     |
| <i>NDUFA4</i>  | <i>LPIN2</i>     |
| <i>NDUFB5</i>  | <i>LPIN3</i>     |
| <i>NDUFS5</i>  | <i>LPO</i>       |
| <i>NEBL</i>    | <i>LRDD</i>      |
| <i>NEDD1</i>   | <i>LRFN2</i>     |
| <i>NEFL</i>    | <i>LRFN4</i>     |
| <i>NEK11</i>   | <i>LRIG2</i>     |
| <i>NEK9</i>    | <i>LRP1B</i>     |
| <i>NETO1</i>   | <i>LRP8</i>      |
| <i>NETO2</i>   | <i>LRRC16B</i>   |
| <i>NEURL</i>   | <i>LRRC17</i>    |
| <i>NEUROD1</i> | <i>LRRC20</i>    |
| <i>NEUROD2</i> | <i>LRRC27</i>    |
| <i>NEUROG3</i> | <i>LRRC29</i>    |
| <i>NFASC</i>   | <i>LRRC41</i>    |
| <i>NFATC3</i>  | <i>LRRC52</i>    |
| <i>NFE2L2</i>  | <i>LRRC8D</i>    |
| <i>NFKBIL2</i> | <i>LRRN2</i>     |
| <i>NFS1</i>    | <i>LRRTM1</i>    |
| <i>NFYA</i>    | <i>LSM6</i>      |
| <i>NG23</i>    | <i>LSS</i>       |
| <i>NGDN</i>    | <i>LYN</i>       |

|                  |                  |
|------------------|------------------|
| <i>NGF</i>       | <i>LYPD1</i>     |
| <i>NGP</i>       | <i>LYPLA3</i>    |
| <i>NHEDC2</i>    | <i>LYSMD2</i>    |
| <i>NIPSNAP3A</i> | <i>LYST</i>      |
| <i>NKG7</i>      | <i>LZTFL1</i>    |
| <i>NKX6-1</i>    | <i>MAF1</i>      |
| <i>NKX6-2</i>    | <i>MAFB</i>      |
| <i>NLGN1</i>     | <i>MAGEA1</i>    |
| <i>NLRP1B</i>    | <i>MAGEA4</i>    |
| <i>NLRX1</i>     | <i>MAGEA8</i>    |
| <i>NME3</i>      | <i>MAGEE1</i>    |
| <i>NMI</i>       | <i>MAGEH1</i>    |
| <i>NODAL</i>     | <i>MAGI3</i>     |
| <i>NOL4</i>      | <i>MAGIX</i>     |
| <i>NOL5A</i>     | <i>MALL</i>      |
| <i>NOLA2</i>     | <i>MAML1</i>     |
| <i>NOLC1</i>     | <i>MAMLD1</i>    |
| <i>NONO</i>      | <i>MAN1A2</i>    |
| <i>NOXA1</i>     | <i>MAN1B1</i>    |
| <i>NPAS4</i>     | <i>MAOA</i>      |
| <i>NPEPL1</i>    | <i>MAP1A</i>     |
| <i>NPFFR2</i>    | <i>MAP2K2</i>    |
| <i>NPLOC4</i>    | <i>MAP3K1</i>    |
| <i>NPNT</i>      | <i>MAP3K12</i>   |
| <i>NPPA</i>      | <i>MAP3K14</i>   |
| <i>NPPC</i>      | <i>MAP3K4</i>    |
| <i>NPR1</i>      | <i>MAP3K6</i>    |
| <i>NPR2</i>      | <i>MAP3K7IP3</i> |
| <i>NPSR1</i>     | <i>MAPKAPK2</i>  |
| <i>NR1H5</i>     | <i>MAPRE3</i>    |
| <i>NR2C2AP</i>   | <i>MAPT</i>      |
| <i>NRARP</i>     | <i>MARCH4</i>    |
| <i>NRBP1</i>     | <i>MARCH9</i>    |
| <i>NRD1</i>      | <i>MARCO</i>     |
| <i>NRN1L</i>     | <i>MARK1</i>     |
| <i>NRSN2</i>     | <i>MAST4</i>     |
| <i>NSG1</i>      | <i>MAT2A</i>     |
| <i>NT5DC1</i>    | <i>MAX</i>       |
| <i>NT5DC2</i>    | <i>MBD1</i>      |
| <i>NT5E</i>      | <i>MBD3</i>      |
| <i>NTHL1</i>     | <i>MBD6</i>      |
| <i>NTN4</i>      | <i>MBOAT1</i>    |
| <i>NUDT10</i>    | <i>MBOAT2</i>    |
| <i>NUDT2</i>     | <i>MCCC1</i>     |
| <i>NUDT3</i>     | <i>MCF2L</i>     |
| <i>NUDT4</i>     | <i>MCM3AP</i>    |

|                |                 |
|----------------|-----------------|
| <i>NUDT6</i>   | <i>MCTS1</i>    |
| <i>NUMA1</i>   | <i>MDH2</i>     |
| <i>NUPL2</i>   | <i>MDM2</i>     |
| <i>NUS1</i>    | <i>MECR</i>     |
| <i>NUT</i>     | <i>MED11</i>    |
| <i>NWD1</i>    | <i>MED12</i>    |
| <i>NXNL1</i>   | <i>MED15</i>    |
| <i>NXPH1</i>   | <i>MED27</i>    |
| <i>NXPH2</i>   | <i>MED8</i>     |
| <i>OAS1C</i>   | <i>MED9</i>     |
| <i>OAS1D</i>   | <i>MEIS3</i>    |
| <i>OAS1E</i>   | <i>METAP2</i>   |
| <i>OAS1H</i>   | <i>METTL1</i>   |
| <i>OASL1</i>   | <i>METTL9</i>   |
| <i>OASL2</i>   | <i>MEX3B</i>    |
| <i>OBFC2A</i>  | <i>MEX3C</i>    |
| <i>OBOX3</i>   | <i>MFAP4</i>    |
| <i>ODZ3</i>    | <i>MFN1</i>     |
| <i>OLFM2</i>   | <i>MFRP</i>     |
| <i>OLFM3</i>   | <i>MGAT5</i>    |
| <i>OLFML2B</i> | <i>MGAT5B</i>   |
| <i>OLFR43</i>  | <i>MGC33894</i> |
| <i>OLFR59</i>  | <i>MGC42105</i> |
| <i>OLFR70</i>  | <i>MIB1</i>     |
| <i>OLR1</i>    | <i>MICAL1</i>   |
| <i>OMG</i>     | <i>MICAL3</i>   |
| <i>OPA3</i>    | <i>MICALCL</i>  |
| <i>OPALIN</i>  | <i>MID2</i>     |
| <i>OPCML</i>   | <i>MINPP1</i>   |
| <i>OPRL1</i>   | <i>MIOX</i>     |
| <i>OPRS1</i>   | <i>MIP</i>      |
| <i>ORC3L</i>   | <i>MIZF</i>     |
| <i>ORC5L</i>   | <i>MKL1</i>     |
| <i>ORMDL2</i>  | <i>MKRN3</i>    |
| <i>ORMDL3</i>  | <i>MKS1</i>     |
| <i>OSBPL1A</i> | <i>MLF1IP</i>   |
| <i>OSGEP</i>   | <i>MLH1</i>     |
| <i>OSGEPL1</i> | <i>MLKL</i>     |
| <i>OSGIN2</i>  | <i>MLSTD1</i>   |
| <i>OSTA</i>    | <i>MLXIP</i>    |
| <i>OTOS</i>    | <i>MMD</i>      |
| <i>OTT</i>     | <i>MME</i>      |
| <i>OTUB1</i>   | <i>MMP1</i>     |
| <i>OTUB2</i>   | <i>MMP10</i>    |
| <i>OXCT2A</i>  | <i>MMP15</i>    |
| <i>OXSM</i>    | <i>MMP21</i>    |

|                |                |
|----------------|----------------|
| <i>OXT</i>     | <i>MMP24</i>   |
| <i>P2RX3</i>   | <i>MMP28</i>   |
| <i>P2RX6</i>   | <i>MMP3</i>    |
| <i>P2RY2</i>   | <i>MMP8</i>    |
| <i>P2RY6</i>   | <i>MNT</i>     |
| <i>P4HA1</i>   | <i>MOAP1</i>   |
| <i>P4HA2</i>   | <i>MOBKL2C</i> |
| <i>P4HA3</i>   | <i>MOCS1</i>   |
| <i>PACS1</i>   | <i>MON1A</i>   |
| <i>PACSIN2</i> | <i>MON1B</i>   |
| <i>PACSIN3</i> | <i>MPDU1</i>   |
| <i>PADI4</i>   | <i>MPI</i>     |
| <i>PAH</i>     | <i>MPP1</i>    |
| <i>PAIP1</i>   | <i>MPP4</i>    |
| <i>PAK7</i>    | <i>MPST</i>    |
| <i>PAPPA</i>   | <i>MREG</i>    |
| <i>PAQR4</i>   | <i>MRGPRX3</i> |
| <i>PAQR9</i>   | <i>MRPL18</i>  |
| <i>PARC</i>    | <i>MRPL28</i>  |
| <i>PARL</i>    | <i>MRPL37</i>  |
| <i>PARP14</i>  | <i>MRPL4</i>   |
| <i>PARP2</i>   | <i>MRPL40</i>  |
| <i>PARVB</i>   | <i>MRPS2</i>   |
| <i>PAWR</i>    | <i>MRPS21</i>  |
| <i>PAX3</i>    | <i>MS4A4A</i>  |
| <i>PBK</i>     | <i>MSI1</i>    |
| <i>PBLD</i>    | <i>MTA3</i>    |
| <i>PBP2</i>    | <i>MTBP</i>    |
| <i>PCDH17</i>  | <i>MTDH</i>    |
| <i>PCDH20</i>  | <i>MTFR1</i>   |
| <i>PCDHB13</i> | <i>MTG1</i>    |
| <i>PCDHB19</i> | <i>MTHFD2L</i> |
| <i>PCDHB21</i> | <i>MTHFR</i>   |
| <i>PCDHB22</i> | <i>MTMR1</i>   |
| <i>PCSK4</i>   | <i>MTMR10</i>  |
| <i>PCSK9</i>   | <i>MTMR11</i>  |
| <i>PDC</i>     | <i>MTMR14</i>  |
| <i>PDCD6</i>   | <i>MTMR2</i>   |
| <i>PDE10A</i>  | <i>MTTP</i>    |
| <i>PDE1A</i>   | <i>MUC20</i>   |
| <i>PDE1B</i>   | <i>MUCL1</i>   |
| <i>PDE4A</i>   | <i>MUM1</i>    |
| <i>PDE7A</i>   | <i>MVD</i>     |
| <i>PDE8A</i>   | <i>MXD3</i>    |
| <i>PDGFB</i>   | <i>MYBL2</i>   |
| <i>PKD1</i>    | <i>MYCN</i>    |

|                |                |
|----------------|----------------|
| <i>PDK4</i>    | <i>MYD88</i>   |
| <i>PDLIM3</i>  | <i>MYH3</i>    |
| <i>PDLIM4</i>  | <i>MYH6</i>    |
| <i>PDLIM5</i>  | <i>MYO18B</i>  |
| <i>PDLIM7</i>  | <i>MYO1G</i>   |
| <i>PDRG1</i>   | <i>MYOC</i>    |
| <i>PDSS1</i>   | <i>MYOM3</i>   |
| <i>PDXK</i>    | <i>MYOZ2</i>   |
| <i>PDZD4</i>   | <i>MYOZ3</i>   |
| <i>PEA15A</i>  | <i>N4BP3</i>   |
| <i>PEBP1</i>   | <i>NAB2</i>    |
| <i>PEF1</i>    | <i>NACA</i>    |
| <i>PELI3</i>   | <i>NACA2</i>   |
| <i>PEO1</i>    | <i>NADK</i>    |
| <i>PEPD</i>    | <i>NAGPA</i>   |
| <i>PER2</i>    | <i>NAPG</i>    |
| <i>PEX11A</i>  | <i>NAT14</i>   |
| <i>PEX6</i>    | <i>NAT6</i>    |
| <i>PFDN5</i>   | <i>NAT8</i>    |
| <i>PFKL</i>    | <i>NAT8B</i>   |
| <i>PGAM2</i>   | <i>NAT9</i>    |
| <i>PGCP</i>    | <i>NBEA</i>    |
| <i>PGD</i>     | <i>NBL1</i>    |
| <i>PGM1</i>    | <i>NCLN</i>    |
| <i>PGM2</i>    | <i>NCOA2</i>   |
| <i>PGM2L1</i>  | <i>NCOR2</i>   |
| <i>PHACTR2</i> | <i>NDUFA12</i> |
| <i>PHC3</i>    | <i>NDUFA4</i>  |
| <i>PHF19</i>   | <i>NDUFB10</i> |
| <i>PHKA1</i>   | <i>NDUFB8</i>  |
| <i>PHLDB2</i>  | <i>NDUFS4</i>  |
| <i>PHOX2B</i>  | <i>NEDD1</i>   |
| <i>PI16</i>    | <i>NEFL</i>    |
| <i>PI4K2A</i>  | <i>NEFM</i>    |
| <i>PI4KA</i>   | <i>NEK10</i>   |
| <i>PIGA</i>    | <i>NES</i>     |
| <i>PIGH</i>    | <i>NEURL</i>   |
| <i>PIGL</i>    | <i>NEUROD1</i> |
| <i>PIGM</i>    | <i>NEUROD2</i> |
| <i>PIK3R3</i>  | <i>NEUROD4</i> |
| <i>PIK3R4</i>  | <i>NEUROG3</i> |
| <i>PIK3R5</i>  | <i>NEXN</i>    |
| <i>PIP</i>     | <i>NFASC</i>   |
| <i>PIP5K1B</i> | <i>NFATC3</i>  |
| <i>PIP5K1C</i> | <i>NFATC4</i>  |
| <i>PITPNM2</i> | <i>NFE2L3</i>  |

|                |                |
|----------------|----------------|
| <i>PIWIL1</i>  | <i>NFKBIA</i>  |
| <i>PKD1</i>    | <i>NFKBIL1</i> |
| <i>PKMYT1</i>  | <i>NFRKB</i>   |
| <i>PKNOX2</i>  | <i>NGEF</i>    |
| <i>PLA2G2F</i> | <i>NHLRC3</i>  |
| <i>PLA2G5</i>  | <i>NIP30</i>   |
| <i>PLA2G6</i>  | <i>NIPBL</i>   |
| <i>PLAC1L</i>  | <i>NISCH</i>   |
| <i>PLAG1</i>   | <i>NKX3-1</i>  |
| <i>PLCB1</i>   | <i>NKX3-2</i>  |
| <i>PLCD1</i>   | <i>NLRC5</i>   |
| <i>PLCH2</i>   | <i>NLRP14</i>  |
| <i>PLCXD1</i>  | <i>NLRP3</i>   |
| <i>PLD3</i>    | <i>NLRX1</i>   |
| <i>PLEC1</i>   | <i>NME4</i>    |
| <i>PLEKHA3</i> | <i>NMI</i>     |
| <i>PLEKHA6</i> | <i>NMNAT2</i>  |
| <i>PLEKHB2</i> | <i>NMNAT3</i>  |
| <i>PLEKHG1</i> | <i>NMUR2</i>   |
| <i>PLK4</i>    | <i>NOL1</i>    |
| <i>PLRG1</i>   | <i>NOL4</i>    |
| <i>PLXNB1</i>  | <i>NOPE</i>    |
| <i>PMF1</i>    | <i>NOS1</i>    |
| <i>PML</i>     | <i>NOS2A</i>   |
| <i>PMM1</i>    | <i>NOS3</i>    |
| <i>PMPCB</i>   | <i>NOX1</i>    |
| <i>PNKD</i>    | <i>NOX4</i>    |
| <i>PNMA3</i>   | <i>NPAS4</i>   |
| <i>PNO1</i>    | <i>NPEPL1</i>  |
| <i>PNP1</i>    | <i>NPHP4</i>   |
| <i>PNPLA2</i>  | <i>NPR2</i>    |
| <i>PNPLA6</i>  | <i>NPTX2</i>   |
| <i>POFUT1</i>  | <i>NPY2R</i>   |
| <i>POFUT2</i>  | <i>NR1I3</i>   |
| <i>POLL</i>    | <i>NR2C2</i>   |
| <i>POLM</i>    | <i>NR2C2AP</i> |
| <i>POLQ</i>    | <i>NR2F2</i>   |
| <i>POLR2C</i>  | <i>NR4A1</i>   |
| <i>POLR2I</i>  | <i>NRBP1</i>   |
| <i>POLR3A</i>  | <i>NRIP3</i>   |
| <i>POLR3E</i>  | <i>NSD1</i>    |
| <i>POLR3H</i>  | <i>NSDHL</i>   |
| <i>POLR3K</i>  | <i>NSF</i>     |
| <i>POMC</i>    | <i>NSUN6</i>   |
| <i>POMT2</i>   | <i>NT5C3</i>   |
| <i>POU4F2</i>  | <i>NT5DC2</i>  |

|                  |                  |
|------------------|------------------|
| <i>PPA1</i>      | <i>NT5E</i>      |
| <i>PPA2</i>      | <i>NUDT14</i>    |
| <i>PPAP2A</i>    | <i>NUDT15</i>    |
| <i>PPAP2B</i>    | <i>NUMA1</i>     |
| <i>PPAP2C</i>    | <i>NUP133</i>    |
| <i>PPAPDC1A</i>  | <i>NUP188</i>    |
| <i>PPARD</i>     | <i>NUP35</i>     |
| <i>PPARGC1B</i>  | <i>NXF1</i>      |
| <i>PPCS</i>      | <i>NXF3</i>      |
| <i>PPID</i>      | <i>NXPH2</i>     |
| <i>PPIH</i>      | <i>OAS3</i>      |
| <i>PPM1D</i>     | <i>ODF1</i>      |
| <i>PPM1E</i>     | <i>ODZ1</i>      |
| <i>PPM1L</i>     | <i>OIP5</i>      |
| <i>PPP1R12A</i>  | <i>OLFML1</i>    |
| <i>PPP1R14D</i>  | <i>OLFML3</i>    |
| <i>PPP1R15B</i>  | <i>OMG</i>       |
| <i>PPP1R3D</i>   | <i>OOEP</i>      |
| <i>PPP2R1A</i>   | <i>OPLAH</i>     |
| <i>PPP2R2C</i>   | <i>OPN5</i>      |
| <i>PPP2R5A</i>   | <i>OPRM1</i>     |
| <i>PPP2R5C</i>   | <i>OPRS1</i>     |
| <i>PPP3CA</i>    | <i>OR2H1</i>     |
| <i>PPP4R2</i>    | <i>ORC3L</i>     |
| <i>PPP5C</i>     | <i>ORMDL3</i>    |
| <i>PPP6C</i>     | <i>OS9</i>       |
| <i>PPT1</i>      | <i>OSBPL11</i>   |
| <i>PPWD1</i>     | <i>OSBPL5</i>    |
| <i>PRDX6-RS1</i> | <i>OSGEP</i>     |
| <i>PREPL</i>     | <i>OSGEPL1</i>   |
| <i>PRICKLE1</i>  | <i>OSGIN2</i>    |
| <i>PRICKLE4</i>  | <i>OSR1</i>      |
| <i>PRKAG2</i>    | <i>OSTM1</i>     |
| <i>PRKAR1A</i>   | <i>OTC</i>       |
| <i>PRKAR2A</i>   | <i>OTUD6B</i>    |
| <i>PRKCZ</i>     | <i>OVOL2</i>     |
| <i>PRKG1</i>     | <i>OXR1</i>      |
| <i>PRKRA</i>     | <i>P2RY11</i>    |
| <i>PRKRIP1</i>   | <i>P4HA2</i>     |
| <i>PRL2C2</i>    | <i>PAAF1</i>     |
| <i>PRL2C4</i>    | <i>PABPC1L2B</i> |
| <i>PROM2</i>     | <i>PABPC4L</i>   |
| <i>PROX1</i>     | <i>PACS1</i>     |
| <i>PROZ</i>      | <i>PAF1</i>      |
| <i>PRPF4</i>     | <i>PAFAH1B3</i>  |
| <i>PRPF40B</i>   | <i>PAFAH2</i>    |



|                |               |
|----------------|---------------|
| <i>PRR11</i>   | <i>PAK3</i>   |
| <i>PRR16</i>   | <i>PAPD4</i>  |
| <i>PRRXL1</i>  | <i>PAPD5</i>  |
| <i>PRSS23</i>  | <i>PAQR3</i>  |
| <i>PRTG</i>    | <i>PARP15</i> |
| <i>PSCD3</i>   | <i>PARP16</i> |
| <i>PSD2</i>    | <i>PARP3</i>  |
| <i>PSEENEN</i> | <i>PARVA</i>  |
| <i>PSG21</i>   | <i>PAWR</i>   |
| <i>PSG22</i>   | <i>PAXIP1</i> |
| <i>PSG27</i>   | <i>PBOV1</i>  |
| <i>PSG29</i>   | <i>PC</i>     |
| <i>PSKH1</i>   | <i>PCBD2</i>  |
| <i>PSMA3</i>   | <i>PCDH18</i> |
| <i>PSMA7</i>   | <i>PCGF5</i>  |
| <i>PSMC1</i>   | <i>PCMTD2</i> |
| <i>PSMC6</i>   | <i>PCTK1</i>  |
| <i>PSMD10</i>  | <i>PCYT2</i>  |
| <i>PSMD11</i>  | <i>PDAP1</i>  |
| <i>PSMD13</i>  | <i>PDC</i>    |
| <i>PTCD2</i>   | <i>PDCD2L</i> |
| <i>PTCD3</i>   | <i>PDCD6</i>  |
| <i>PTGDS</i>   | <i>PDE10A</i> |
| <i>PTGER1</i>  | <i>PDE1B</i>  |
| <i>PTGER2</i>  | <i>PDE2A</i>  |
| <i>PTGER4</i>  | <i>PDE4A</i>  |
| <i>PTGFR</i>   | <i>PDGFC</i>  |
| <i>PTGFRN</i>  | <i>PDLIM3</i> |
| <i>PTGIS</i>   | <i>PDP2</i>   |
| <i>PTH</i>     | <i>PDS5A</i>  |
| <i>PTHLH</i>   | <i>PDSS1</i>  |
| <i>PTMS</i>    | <i>PDXDC1</i> |
| <i>PTPN1</i>   | <i>PDZD4</i>  |
| <i>PTPN13</i>  | <i>PEBP4</i>  |
| <i>PTPN14</i>  | <i>PERLD1</i> |
| <i>PTPN18</i>  | <i>PES1</i>   |
| <i>PTPN2</i>   | <i>PEX11B</i> |
| <i>PTPN22</i>  | <i>PEX12</i>  |
| <i>PTPN23</i>  | <i>PEX26</i>  |
| <i>PTPN4</i>   | <i>PFDN6</i>  |
| <i>PTPN5</i>   | <i>PFKFB4</i> |
| <i>PTPRF</i>   | <i>PFKM</i>   |
| <i>PTPRM</i>   | <i>PFTK1</i>  |
| <i>PTPRT</i>   | <i>PGAM2</i>  |
| <i>PTRF</i>    | <i>PGBD2</i>  |
| <i>PUM2</i>    | <i>PGD</i>    |

PURB  
PUS3  
PWP2  
PYCRL  
PYGO2  
PYROXD1  
QRFP  
R3HDM1  
RAB10  
RAB11FIP4  
RAB11FIP5  
RAB13  
RAB15  
RAB27A  
RAB32  
RAB34  
RAB40C  
RAB4B  
RAB6B  
RAB7L1  
RAB8A  
RABEP1  
RABEPK  
RABIF  
RABL4  
RABL5  
RAC1  
RAD50  
RAD52  
RAET1B  
RAET1C  
RALB  
RAPGEF1  
RAPGEF3  
RAPGEF6  
RARRES2  
RASD1  
RASSF8  
RASSF9  
RAVER2  
RBBP5  
RBM13  
RBM15  
RBM19  
RBM44  
RBM6

PGLS  
PGLYRP1  
PGM1  
PGM2  
PGM3  
PHACTR3  
PHACTR4  
PHEX  
PHF15  
PHF2  
PHF21A  
PHF21B  
PHF23  
PHF5A  
PHGDH  
PHIP  
PHKG1  
PHKG2  
PHOX2B  
PHTF1  
PHTF2  
PIAS2  
PICK1  
PIGK  
PIGM  
PIGN  
PIGS  
PIGY  
PIK3AP1  
PIK3C2B  
PIK3CD  
PIK3R2  
PIK3R6  
PIM3  
PIN4  
PIP  
PIP5K1A  
PIP5K1B  
PITPNB  
PITPNM2  
PKD2  
PLA2G2F  
PLA2G4F  
PLAA  
PLAG1  
PLCD1

|                 |                 |
|-----------------|-----------------|
| <i>RBMS2</i>    | <i>PLCL1</i>    |
| <i>RCC2</i>     | <i>PLCZ1</i>    |
| <i>RCN1</i>     | <i>PLEKHA6</i>  |
| <i>RCN3</i>     | <i>PLEKHA9</i>  |
| <i>RCOR2</i>    | <i>PLEKHF2</i>  |
| <i>RDH11</i>    | <i>PLEKHH1</i>  |
| <i>RDH12</i>    | <i>PLEKHJ1</i>  |
| <i>RDH9</i>     | <i>PLEKHM1</i>  |
| <i>REEP3</i>    | <i>PLEKHO2</i>  |
| <i>REG3D</i>    | <i>PLTP</i>     |
| <i>REL</i>      | <i>PLXNA4</i>   |
| <i>RELL1</i>    | <i>PLXNB1</i>   |
| <i>REV1</i>     | <i>PMF1</i>     |
| <i>REV3L</i>    | <i>PMPCB</i>    |
| <i>RFC2</i>     | <i>PNLIPRP1</i> |
| <i>RFESD</i>    | <i>PNMA1</i>    |
| <i>RFTN2</i>    | <i>PNO1</i>     |
| <i>RFWD3</i>    | <i>PNOC</i>     |
| <i>RFXDC1</i>   | <i>PNPLA1</i>   |
| <i>RG9MTD3</i>  | <i>PNPLA2</i>   |
| <i>RGMA</i>     | <i>PNPLA6</i>   |
| <i>RGS10</i>    | <i>PNPT1</i>    |
| <i>RGS16</i>    | <i>PNRC2</i>    |
| <i>RGS19</i>    | <i>PODN</i>     |
| <i>RGS2</i>     | <i>PODXL2</i>   |
| <i>RGS3</i>     | <i>POLDIP2</i>  |
| <i>RGS7BP</i>   | <i>POLE4</i>    |
| <i>RGS8</i>     | <i>POLQ</i>     |
| <i>RGS9BP</i>   | <i>POLR2A</i>   |
| <i>RHBDL3</i>   | <i>POLR3D</i>   |
| <i>RHEBL1</i>   | <i>POLS</i>     |
| <i>RHOBTB1</i>  | <i>POMC</i>     |
| <i>RHOD</i>     | <i>POP4</i>     |
| <i>RHOV</i>     | <i>POPDC3</i>   |
| <i>RHOX10</i>   | <i>POSTN</i>    |
| <i>RHOX11</i>   | <i>POU2F3</i>   |
| <i>RHOX12</i>   | <i>POU4F2</i>   |
| <i>RHOX6</i>    | <i>POU6F1</i>   |
| <i>RIC3</i>     | <i>PPAP2A</i>   |
| <i>RIMBP2</i>   | <i>PPAPDC1B</i> |
| <i>RIOK3</i>    | <i>PPAPDC2</i>  |
| <i>RMND5B</i>   | <i>PPARG</i>    |
| <i>RNASEH1</i>  | <i>PPARGC1B</i> |
| <i>RNASEH2B</i> | <i>PPAT</i>     |
| <i>RNF10</i>    | <i>PPBP</i>     |
| <i>RNF12</i>    | <i>PPFIA4</i>   |

|                 |                 |
|-----------------|-----------------|
| <i>RNF135</i>   | <i>PPFIBP1</i>  |
| <i>RNF138</i>   | <i>PPHLN1</i>   |
| <i>RNF151</i>   | <i>PPID</i>     |
| <i>RNF17</i>    | <i>PPIF</i>     |
| <i>RNF219</i>   | <i>PPIH</i>     |
| <i>RNF220</i>   | <i>PPIL2</i>    |
| <i>RNF25</i>    | <i>PPIL3</i>    |
| <i>RNF40</i>    | <i>PPIL4</i>    |
| <i>RNF5</i>     | <i>PPL</i>      |
| <i>RNF8</i>     | <i>PPM1E</i>    |
| <i>RNGTT</i>    | <i>PPP1R14C</i> |
| <i>RNPS1</i>    | <i>PPP1R2</i>   |
| <i>RP9</i>      | <i>PPP1R3C</i>  |
| <i>RPA2</i>     | <i>PPP1R7</i>   |
| <i>RPGR</i>     | <i>PPP2CA</i>   |
| <i>RPL13</i>    | <i>PPP2R1A</i>  |
| <i>RPL18A</i>   | <i>PPP2R1B</i>  |
| <i>RPL28</i>    | <i>PPP2R2A</i>  |
| <i>RPL36A</i>   | <i>PPP2R3A</i>  |
| <i>RPL37A</i>   | <i>PPP5C</i>    |
| <i>RPL39</i>    | <i>PPT1</i>     |
| <i>RPL6</i>     | <i>PPTC7</i>    |
| <i>RPL7L1</i>   | <i>PQLC3</i>    |
| <i>RPN1</i>     | <i>PRDM1</i>    |
| <i>RPN2</i>     | <i>PRDM13</i>   |
| <i>RPP25</i>    | <i>PREB</i>     |
| <i>RPP38</i>    | <i>PRELID2</i>  |
| <i>RPP40</i>    | <i>PRICKLE1</i> |
| <i>RPS19BP1</i> | <i>PRKAG2</i>   |
| <i>RPS24</i>    | <i>PRKCE</i>    |
| <i>RPS5</i>     | <i>PRKCZ</i>    |
| <i>RPS6KA5</i>  | <i>PRKD3</i>    |
| <i>RPS6KB1</i>  | <i>PRKG1</i>    |
| <i>RPS6KB2</i>  | <i>PRKG2</i>    |
| <i>RPS6KC1</i>  | <i>PRMT2</i>    |
| <i>RPS6KL1</i>  | <i>PRMT6</i>    |
| <i>RRAD</i>     | <i>PRMT7</i>    |
| <i>RRAS</i>     | <i>PRNP</i>     |
| <i>RS1</i>      | <i>PROL1</i>    |
| <i>RSAD1</i>    | <i>PROZ</i>     |
| <i>RSF1</i>     | <i>PRPF38A</i>  |
| <i>RSPO2</i>    | <i>PRPH2</i>    |
| <i>RSPRY1</i>   | <i>PRR16</i>    |
| <i>RTCD1</i>    | <i>PRR18</i>    |
| <i>RTN4</i>     | <i>PRR6</i>     |
| <i>RTN4R</i>    | <i>PRRG3</i>    |

|                |                 |
|----------------|-----------------|
| <i>RUFY1</i>   | <i>PRRT2</i>    |
| <i>RUNX1</i>   | <i>PRSS21</i>   |
| <i>RUNX1T1</i> | <i>PRSS7</i>    |
| <i>RUNX2</i>   | <i>PRSS8</i>    |
| <i>RUSC1</i>   | <i>PRTG</i>     |
| <i>RWDD3</i>   | <i>PSAP</i>     |
| <i>RWDD4A</i>  | <i>PSCA</i>     |
| <i>RYR1</i>    | <i>PSCDBP</i>   |
| <i>S100A16</i> | <i>PSD2</i>     |
| <i>S100A3</i>  | <i>PSD4</i>     |
| <i>S100A5</i>  | <i>PSKH1</i>    |
| <i>SALL3</i>   | <i>PSMB3</i>    |
| <i>SAMD10</i>  | <i>PSMB6</i>    |
| <i>SAMM50</i>  | <i>PSMB7</i>    |
| <i>SAP30</i>   | <i>PSMB8</i>    |
| <i>SAP30BP</i> | <i>PSMC3</i>    |
| <i>SAR1A</i>   | <i>PSMC5</i>    |
| <i>SARDH</i>   | <i>PSMD1</i>    |
| <i>SARM1</i>   | <i>PSMD13</i>   |
| <i>SARS</i>    | <i>PSMD14</i>   |
| <i>SART1</i>   | <i>PSMD7</i>    |
| <i>SATB2</i>   | <i>PSORS1C1</i> |
| <i>SBF1</i>    | <i>PSRC1</i>    |
| <i>SBK1</i>    | <i>PTAR1</i>    |
| <i>SCAMP1</i>  | <i>PTBP1</i>    |
| <i>SCAMP2</i>  | <i>PTCD3</i>    |
| <i>SCARA5</i>  | <i>PTCHD2</i>   |
| <i>SCARB1</i>  | <i>PTGER3</i>   |
| <i>SCCPDH</i>  | <i>PTGS2</i>    |
| <i>SCD2</i>    | <i>PTH</i>      |
| <i>SCEL</i>    | <i>PTP4A3</i>   |
| <i>SCG3</i>    | <i>PTPLB</i>    |
| <i>SCGB1A1</i> | <i>PTPMT1</i>   |
| <i>SCGB3A1</i> | <i>PTPN13</i>   |
| <i>SCGN</i>    | <i>PTPN18</i>   |
| <i>SCN1A</i>   | <i>PTPN2</i>    |
| <i>SCN3B</i>   | <i>PTPRA</i>    |
| <i>SCN4B</i>   | <i>PTPRK</i>    |
| <i>SCNN1G</i>  | <i>PTRH1</i>    |
| <i>SDAD1</i>   | <i>PUF60</i>    |
| <i>SDCBP2</i>  | <i>PUS10</i>    |
| <i>SDF2</i>    | <i>PVALB</i>    |
| <i>SDPR</i>    | <i>PXDN</i>     |
| <i>SDS</i>     | <i>PXDNL</i>    |
| <i>SEC14L4</i> | <i>PXK</i>      |
| <i>SEC22C</i>  | <i>PXMP2</i>    |

|                  |                  |
|------------------|------------------|
| <i>SEC23B</i>    | <i>PXMP3</i>     |
| <i>SECISBP2</i>  | <i>PYGO2</i>     |
| <i>SEMA3A</i>    | <i>QARS</i>      |
| <i>SEMA6D</i>    | <i>QPCTL</i>     |
| <i>SEPP1</i>     | <i>QRICH1</i>    |
| <i>SEPX1</i>     | <i>R3HDM1</i>    |
| <i>SERBP1</i>    | <i>RAB11FIP3</i> |
| <i>SERINC1</i>   | <i>RAB11FIP5</i> |
| <i>SERINC4</i>   | <i>RAB15</i>     |
| <i>SERP1</i>     | <i>RAB21</i>     |
| <i>SERPINA3C</i> | <i>RAB24</i>     |
| <i>SERPINA3F</i> | <i>RAB25</i>     |
| <i>SERPINB12</i> | <i>RAB26</i>     |
| <i>SERPINB13</i> | <i>RAB27B</i>    |
| <i>SERPINB3A</i> | <i>RAB32</i>     |
| <i>SERPINB8</i>  | <i>RAB34</i>     |
| <i>SERPINB9C</i> | <i>RAB35</i>     |
| <i>SERPINC1</i>  | <i>RAB31P</i>    |
| <i>SERPINF1</i>  | <i>RAB4B</i>     |
| <i>SERPINF2</i>  | <i>RAB6A</i>     |
| <i>SERPINI1</i>  | <i>RAB7L1</i>    |
| <i>SERTAD2</i>   | <i>RABEPK</i>    |
| <i>SESN1</i>     | <i>RABL4</i>     |
| <i>SETD7</i>     | <i>RACGAP1</i>   |
| <i>SF3A1</i>     | <i>RAD51</i>     |
| <i>SF3B2</i>     | <i>RAD51L1</i>   |
| <i>SF3B4</i>     | <i>RAD9A</i>     |
| <i>SF3B5</i>     | <i>RAD9B</i>     |
| <i>SFRS11</i>    | <i>RAG2</i>      |
| <i>SFRS17B</i>   | <i>RAGE</i>      |
| <i>SFXN2</i>     | <i>RAMP1</i>     |
| <i>SFXN4</i>     | <i>RAMP3</i>     |
| <i>SGCG</i>      | <i>RANBP2</i>    |
| <i>SGIP1</i>     | <i>RANGAP1</i>   |
| <i>SGPP1</i>     | <i>RAPGEF4</i>   |
| <i>SGTB</i>      | <i>RAPGEF5</i>   |
| <i>SH2B3</i>     | <i>RAPGEFL1</i>  |
| <i>SH2D2A</i>    | <i>RARRES1</i>   |
| <i>SH3BGR</i>    | <i>RASA1</i>     |
| <i>SH3BP2</i>    | <i>RASAL1</i>    |
| <i>SH3BP5</i>    | <i>RASAL2</i>    |
| <i>SH3PXD2B</i>  | <i>RASGRF1</i>   |
| <i>SH3RF2</i>    | <i>RASGRP3</i>   |
| <i>SH3TC2</i>    | <i>RASIP1</i>    |
| <i>SH3YL1</i>    | <i>RASL10B</i>   |
| <i>SHISA3</i>    | <i>RASSF2</i>    |

|                 |                |
|-----------------|----------------|
| <i>SHKBP1</i>   | <i>RASSF4</i>  |
| <i>SIAH1A</i>   | <i>RASSF5</i>  |
| <i>SIAH1B</i>   | <i>RAVER2</i>  |
| <i>SIGIRR</i>   | <i>RBM15</i>   |
| <i>SIL1</i>     | <i>RBM28</i>   |
| <i>SIN3A</i>    | <i>RBM35B</i>  |
| <i>SIRT1</i>    | <i>RBM4B</i>   |
| <i>SIRT3</i>    | <i>RBM5</i>    |
| <i>SIX5</i>     | <i>RBM6</i>    |
| <i>SKIV2L2</i>  | <i>RBM8A</i>   |
| <i>SKP1A</i>    | <i>RBMS2</i>   |
| <i>SLC10A5</i>  | <i>RCAN2</i>   |
| <i>SLC16A2</i>  | <i>RCL1</i>    |
| <i>SLC16A4</i>  | <i>RCN3</i>    |
| <i>SLC17A5</i>  | <i>RCOR2</i>   |
| <i>SLC17A6</i>  | <i>RDH12</i>   |
| <i>SLC19A2</i>  | <i>RDH16</i>   |
| <i>SLC1A2</i>   | <i>RECQL4</i>  |
| <i>SLC1A5</i>   | <i>REEP3</i>   |
| <i>SLC22A18</i> | <i>REEP4</i>   |
| <i>SLC22A2</i>  | <i>REEP5</i>   |
| <i>SLC23A2</i>  | <i>REG3A</i>   |
| <i>SLC24A1</i>  | <i>RELA</i>    |
| <i>SLC24A6</i>  | <i>RELL1</i>   |
| <i>SLC25A10</i> | <i>RELL2</i>   |
| <i>SLC25A14</i> | <i>REXO4</i>   |
| <i>SLC25A16</i> | <i>RFT1</i>    |
| <i>SLC25A23</i> | <i>RFTN2</i>   |
| <i>SLC25A25</i> | <i>RFX2</i>    |
| <i>SLC25A38</i> | <i>RFX5</i>    |
| <i>SLC25A46</i> | <i>RFXAP</i>   |
| <i>SLC25A5</i>  | <i>RFXDC1</i>  |
| <i>SLC26A4</i>  | <i>RGL4</i>    |
| <i>SLC26A5</i>  | <i>RGMA</i>    |
| <i>SLC28A3</i>  | <i>RGS10</i>   |
| <i>SLC29A1</i>  | <i>RGS22</i>   |
| <i>SLC29A4</i>  | <i>RGS4</i>    |
| <i>SLC2A1</i>   | <i>RGS7BP</i>  |
| <i>SLC2A3</i>   | <i>RHBDD1</i>  |
| <i>SLC2A6</i>   | <i>RHBG</i>    |
| <i>SLC34A2</i>  | <i>RHD</i>     |
| <i>SLC35A5</i>  | <i>RHEBL1</i>  |
| <i>SLC35B1</i>  | <i>RHOB</i>    |
| <i>SLC35B2</i>  | <i>RHOBTB1</i> |
| <i>SLC35B3</i>  | <i>RHOC</i>    |
| <i>SLC35B4</i>  | <i>RHOD</i>    |

|                 |                      |
|-----------------|----------------------|
| <i>SLC35C1</i>  | <i>RHOQ</i>          |
| <i>SLC35D1</i>  | <i>RHOT2</i>         |
| <i>SLC36A1</i>  | <i>RICTOR</i>        |
| <i>SLC37A1</i>  | <i>RILPL2</i>        |
| <i>SLC37A3</i>  | <i>RIMS1</i>         |
| <i>SLC38A11</i> | <i>RIOK2</i>         |
| <i>SLC38A7</i>  | <i>RIPK1</i>         |
| <i>SLC39A11</i> | <i>RIPK4</i>         |
| <i>SLC39A5</i>  | <i>RNASE6</i>        |
| <i>SLC3A1</i>   | <i>RNASE7</i>        |
| <i>SLC41A2</i>  | <i>RNASEK</i>        |
| <i>SLC41A3</i>  | <i>RNASET2</i>       |
| <i>SLC43A2</i>  | <i>RND3</i>          |
| <i>SLC43A3</i>  | <i>RNF13</i>         |
| <i>SLC46A3</i>  | <i>RNF135</i>        |
| <i>SLC47A2</i>  | <i>RNF138</i>        |
| <i>SLC4A10</i>  | <i>RNF139</i>        |
| <i>SLC4A9</i>   | <i>RNF217</i>        |
| <i>SLC5A11</i>  | <i>RNF219</i>        |
| <i>SLC6A13</i>  | <i>RNF25</i>         |
| <i>SLC6A17</i>  | <i>RNF41</i>         |
| <i>SLC6A20A</i> | <i>RNGTT</i>         |
| <i>SLC6A4</i>   | <i>RNUXA</i>         |
| <i>SLC6A8</i>   | <i>ROGDI</i>         |
| <i>SLC7A10</i>  | <i>ROM1</i>          |
| <i>SLC7A13</i>  | <i>ROR2</i>          |
| <i>SLC7A4</i>   | <i>RORA</i>          |
| <i>SLC7A7</i>   | <i>RORC</i>          |
| <i>SLC9A2</i>   | <i>RP11-529I10.4</i> |
| <i>SLCO2A1</i>  | <i>RPA2</i>          |
| <i>SLCO4A1</i>  | <i>RPAP1</i>         |
| <i>SLMO1</i>    | <i>RPL10L</i>        |
| <i>SMAD2</i>    | <i>RPL11</i>         |
| <i>SMARCAL1</i> | <i>RPL27A</i>        |
| <i>SMARCD1</i>  | <i>RPL37A</i>        |
| <i>SMC6</i>     | <i>RPP25</i>         |
| <i>SMG7</i>     | <i>RPP40</i>         |
| <i>SMOX</i>     | <i>RPRML</i>         |
| <i>SMPD1</i>    | <i>RPS20</i>         |
| <i>SMPDL3B</i>  | <i>RPS3</i>          |
| <i>SMS</i>      | <i>RPS6KA5</i>       |
| <i>SMU1</i>     | <i>RPS6KA6</i>       |
| <i>SMYD1</i>    | <i>RPS6KB2</i>       |
| <i>SNAI1</i>    | <i>RPTN</i>          |
| <i>SNAPIN</i>   | <i>RPUSD1</i>        |
| <i>SNCG</i>     | <i>RRAD</i>          |



|                |                |
|----------------|----------------|
| <i>SNF1LK</i>  | <i>RRAGA</i>   |
| <i>SNF1LK2</i> | <i>RRAGD</i>   |
| <i>SNN</i>     | <i>RRAS</i>    |
| <i>SNRK</i>    | <i>RSBN1L</i>  |
| <i>SNRP70</i>  | <i>RSF1</i>    |
| <i>SNTB1</i>   | <i>RSPO1</i>   |
| <i>SNX15</i>   | <i>RSPO2</i>   |
| <i>SNX19</i>   | <i>RSPO4</i>   |
| <i>SNX2</i>    | <i>RTF1</i>    |
| <i>SNX25</i>   | <i>RTN4R</i>   |
| <i>SNX29</i>   | <i>RTN4RL1</i> |
| <i>SNX30</i>   | <i>RTTN</i>    |
| <i>SNX33</i>   | <i>RUFY2</i>   |
| <i>SNX4</i>    | <i>RUNX1T1</i> |
| <i>SNX5</i>    | <i>RXFP2</i>   |
| <i>SOCS1</i>   | <i>RXRB</i>    |
| <i>SOCS2</i>   | <i>S100A14</i> |
| <i>SOCS3</i>   | <i>S100A3</i>  |
| <i>SON</i>     | <i>S100A5</i>  |
| <i>SORCS2</i>  | <i>S100A8</i>  |
| <i>SOS1</i>    | <i>S100P</i>   |
| <i>SOSTDC1</i> | <i>SACS</i>    |
| <i>SOX11</i>   | <i>SALL4</i>   |
| <i>SOX8</i>    | <i>SAP30BP</i> |
| <i>SP4</i>     | <i>SAP30L</i>  |
| <i>SPAG6</i>   | <i>SAPS3</i>   |
| <i>SPAG7</i>   | <i>SART3</i>   |
| <i>SPARCL1</i> | <i>SAT1</i>    |
| <i>SPATA16</i> | <i>SATB2</i>   |
| <i>SPATA2</i>  | <i>SBF1</i>    |
| <i>SPCS2</i>   | <i>SCAP</i>    |
| <i>SPEER4B</i> | <i>SCEL</i>    |
| <i>SPEER4D</i> | <i>SCGB1D2</i> |
| <i>SPEER4F</i> | <i>SCN1A</i>   |
| <i>SPEF1</i>   | <i>SCN2A</i>   |
| <i>SPEN</i>    | <i>SCN2B</i>   |
| <i>SPHK2</i>   | <i>SCN3A</i>   |
| <i>SPIC</i>    | <i>SCN4A</i>   |
| <i>SPINK2</i>  | <i>SCNN1A</i>  |
| <i>SPINT1</i>  | <i>SCNN1D</i>  |
| <i>SPINT2</i>  | <i>SCNN1G</i>  |
| <i>SPNB3</i>   | <i>SCRT1</i>   |
| <i>SPOCK3</i>  | <i>SDC2</i>    |
| <i>SPON1</i>   | <i>SDCBP2</i>  |
| <i>SPP2</i>    | <i>SDHD</i>    |
| <i>SPRR2F</i>  | <i>SEC22A</i>  |

|                   |                 |
|-------------------|-----------------|
| <i>SPRR2K</i>     | <i>SEC22C</i>   |
| <i>SPTLC1</i>     | <i>SEC23A</i>   |
| <i>SPTLC2</i>     | <i>SEC23B</i>   |
| <i>SRFBP1</i>     | <i>SEC61A1</i>  |
| <i>SRP68</i>      | <i>SEC61G</i>   |
| <i>SRP72</i>      | <i>SEH1L</i>    |
| <i>SRPX2</i>      | <i>SELENBP1</i> |
| <i>SRRP</i>       | <i>SELS</i>     |
| <i>SSBP2</i>      | <i>SEMA3A</i>   |
| <i>SSBP4</i>      | <i>SEMA3B</i>   |
| <i>SSR1</i>       | <i>SEMA5A</i>   |
| <i>SSR4</i>       | <i>SEMA6D</i>   |
| <i>SSTR1</i>      | <i>SEMA7A</i>   |
| <i>SSTR4</i>      | <i>SENP3</i>    |
| <i>SSTR5</i>      | <i>SENP6</i>    |
| <i>ST3GAL3</i>    | <i>SEPN1</i>    |
| <i>ST3GAL5</i>    | <i>SEPSECS</i>  |
| <i>ST6GAL1</i>    | <i>SERAC1</i>   |
| <i>ST6GAL2</i>    | <i>SERP1</i>    |
| <i>ST6GALNAC5</i> | <i>SERPINA1</i> |
| <i>STAC</i>       | <i>SERPINA3</i> |
| <i>STAG3</i>      | <i>SERPINB1</i> |
| <i>STARD3NL</i>   | <i>SERPINB2</i> |
| <i>STAT3</i>      | <i>SERPINB8</i> |
| <i>STC1</i>       | <i>SERPINE1</i> |
| <i>STK17B</i>     | <i>SERPINF2</i> |
| <i>STK19</i>      | <i>SERPING1</i> |
| <i>STK38L</i>     | <i>SESN1</i>    |
| <i>STOX2</i>      | <i>SESN2</i>    |
| <i>STRN3</i>      | <i>SETD1A</i>   |
| <i>STT3B</i>      | <i>SETD6</i>    |
| <i>STUB1</i>      | <i>SETD7</i>    |
| <i>STX4A</i>      | <i>SEZ6L2</i>   |
| <i>STX5A</i>      | <i>SF3A2</i>    |
| <i>SUCLG1</i>     | <i>SF3B3</i>    |
| <i>SULF1</i>      | <i>SF4</i>      |
| <i>SULT5A1</i>    | <i>SFN</i>      |
| <i>SUNC1</i>      | <i>SFRS10</i>   |
| <i>SUOX</i>       | <i>SFRS11</i>   |
| <i>SUPT3H</i>     | <i>SFRS16</i>   |
| <i>SURF4</i>      | <i>SFRS2IP</i>  |
| <i>SVA</i>        | <i>SFT2D2</i>   |
| <i>SYNGR3</i>     | <i>SFXN2</i>    |
| <i>SYT1</i>       | <i>SGCA</i>     |
| <i>SYT15</i>      | <i>SGCG</i>     |
| <i>SYT4</i>       | <i>SGEF</i>     |

|                 |                 |
|-----------------|-----------------|
| <i>SYTL1</i>    | <i>SGSM2</i>    |
| <i>SYTL4</i>    | <i>SH2D2A</i>   |
| <i>SYVN1</i>    | <i>SH3BGRL</i>  |
| <i>T</i>        | <i>SH3BGRL2</i> |
| <i>TAC1</i>     | <i>SH3BP5</i>   |
| <i>TACC2</i>    | <i>SH3GL1</i>   |
| <i>TADA3L</i>   | <i>SH3MD4</i>   |
| <i>TAF1C</i>    | <i>SH3PXD2A</i> |
| <i>TAF8</i>     | <i>SH3TC1</i>   |
| <i>TAOK1</i>    | <i>SHBG</i>     |
| <i>TAS1R2</i>   | <i>SHC4</i>     |
| <i>TASP1</i>    | <i>SHD</i>      |
| <i>TATDN1</i>   | <i>SHF</i>      |
| <i>TBC1D12</i>  | <i>SHMT2</i>    |
| <i>TBC1D13</i>  | <i>SHROOM2</i>  |
| <i>TBC1D19</i>  | <i>SIAH1</i>    |
| <i>TBC1D20</i>  | <i>SIDT1</i>    |
| <i>TBCC</i>     | <i>SIGLEC8</i>  |
| <i>TBPL1</i>    | <i>SIM2</i>     |
| <i>TBPL2</i>    | <i>SIN3A</i>    |
| <i>TBRG4</i>    | <i>SIRPB1</i>   |
| <i>TBX10</i>    | <i>SIX4</i>     |
| <i>TBXA2R</i>   | <i>SKAP2</i>    |
| <i>TBXAS1</i>   | <i>SKIL</i>     |
| <i>TCF25</i>    | <i>SKIV2L2</i>  |
| <i>TCF7</i>     | <i>SLC10A1</i>  |
| <i>TCFCP2</i>   | <i>SLC11A2</i>  |
| <i>TCFCP2L1</i> | <i>SLC12A5</i>  |
| <i>TCFEB</i>    | <i>SLC12A7</i>  |
| <i>TCFEC</i>    | <i>SLC13A2</i>  |
| <i>TCN2</i>     | <i>SLC13A5</i>  |
| <i>TCP1</i>     | <i>SLC15A4</i>  |
| <i>TCP10</i>    | <i>SLC17A1</i>  |
| <i>TCP11L1</i>  | <i>SLC1A5</i>   |
| <i>TCP11L2</i>  | <i>SLC20A2</i>  |
| <i>TCTA</i>     | <i>SLC22A1</i>  |
| <i>TDGF1</i>    | <i>SLC22A11</i> |
| <i>TDH</i>      | <i>SLC22A18</i> |
| <i>TDRD7</i>    | <i>SLC22A5</i>  |
| <i>TECTA</i>    | <i>SLC22A8</i>  |
| <i>TEDDM1</i>   | <i>SLC25A10</i> |
| <i>TEP1</i>     | <i>SLC25A12</i> |
| <i>TERF1</i>    | <i>SLC25A15</i> |
| <i>TESP2</i>    | <i>SLC25A24</i> |
| <i>TFDP2</i>    | <i>SLC25A30</i> |
| <i>TFF3</i>     | <i>SLC25A40</i> |

|                 |                 |
|-----------------|-----------------|
| <i>TFRC</i>     | <i>SLC25A43</i> |
| <i>TG</i>       | <i>SLC25A45</i> |
| <i>TGDS</i>     | <i>SLC25A5</i>  |
| <i>TGFBRAP1</i> | <i>SLC26A11</i> |
| <i>TGIF2</i>    | <i>SLC26A9</i>  |
| <i>THAP1</i>    | <i>SLC29A1</i>  |
| <i>THAP2</i>    | <i>SLC2A1</i>   |
| <i>THBD</i>     | <i>SLC2A4RG</i> |
| <i>THRB</i>     | <i>SLC30A4</i>  |
| <i>THUMPD1</i>  | <i>SLC30A7</i>  |
| <i>THY1</i>     | <i>SLC30A8</i>  |
| <i>TICAM2</i>   | <i>SLC35A4</i>  |
| <i>TIMD2</i>    | <i>SLC35A5</i>  |
| <i>TIPARP</i>   | <i>SLC35B3</i>  |
| <i>TIRAP</i>    | <i>SLC35D2</i>  |
| <i>TJAP1</i>    | <i>SLC35D3</i>  |
| <i>TK2</i>      | <i>SLC36A1</i>  |
| <i>TKTL1</i>    | <i>SLC37A1</i>  |
| <i>TLN1</i>     | <i>SLC37A3</i>  |
| <i>TM2D2</i>    | <i>SLC38A7</i>  |
| <i>TM2D3</i>    | <i>SLC38A9</i>  |
| <i>TM4SF1</i>   | <i>SLC39A5</i>  |
| <i>TM7SF3</i>   | <i>SLC39A9</i>  |
| <i>TM9SF3</i>   | <i>SLC41A2</i>  |
| <i>TMC7</i>     | <i>SLC41A3</i>  |
| <i>TMCO1</i>    | <i>SLC43A2</i>  |
| <i>TMCO3</i>    | <i>SLC45A3</i>  |
| <i>TMCO4</i>    | <i>SLC46A3</i>  |
| <i>TMED3</i>    | <i>SLC4A11</i>  |
| <i>TMEFF1</i>   | <i>SLC5A10</i>  |
| <i>TMEM104</i>  | <i>SLC5A11</i>  |
| <i>TMEM121</i>  | <i>SLC6A14</i>  |
| <i>TMEM128</i>  | <i>SLC6A3</i>   |
| <i>TMEM132A</i> | <i>SLC6A4</i>   |
| <i>TMEM135</i>  | <i>SLC6A8</i>   |
| <i>TMEM144</i>  | <i>SLC7A10</i>  |
| <i>TMEM154</i>  | <i>SLC7A9</i>   |
| <i>TMEM161A</i> | <i>SLC8A1</i>   |
| <i>TMEM162</i>  | <i>SLC9A6</i>   |
| <i>TMEM177</i>  | <i>SLC9A8</i>   |
| <i>TMEM208</i>  | <i>SLCO3A1</i>  |
| <i>TMEM30B</i>  | <i>SLCO5A1</i>  |
| <i>TMEM37</i>   | <i>SLCO6A1</i>  |
| <i>TMEM40</i>   | <i>SLFN5</i>    |
| <i>TMEM41A</i>  | <i>SLIT1</i>    |
| <i>TMEM51</i>   | <i>SLIT2</i>    |

|                  |                |
|------------------|----------------|
| <i>TMEM55A</i>   | <i>SLITRK6</i> |
| <i>TMEM56</i>    | <i>SLK</i>     |
| <i>TMEM66</i>    | <i>SLMAP</i>   |
| <i>TMEM80</i>    | <i>SLURP1</i>  |
| <i>TMEM85</i>    | <i>SMARCA4</i> |
| <i>TMEM90A</i>   | <i>SMARCC1</i> |
| <i>TMOD1</i>     | <i>SMARCD2</i> |
| <i>TMSB4X</i>    | <i>SMC1B</i>   |
| <i>TMTC3</i>     | <i>SMC6</i>    |
| <i>TNFAIP1</i>   | <i>SMCP</i>    |
| <i>TNFRSF13C</i> | <i>SMG5</i>    |
| <i>TNFRSF19</i>  | <i>SMPD1</i>   |
| <i>TNFRSF21</i>  | <i>SMUG1</i>   |
| <i>TNFRSF22</i>  | <i>SMYD5</i>   |
| <i>TNFSF10</i>   | <i>SNAI1</i>   |
| <i>TNFSF11</i>   | <i>SNAP29</i>  |
| <i>TNNC2</i>     | <i>SNAP91</i>  |
| <i>TNNT3</i>     | <i>SNAPIN</i>  |
| <i>TNPO2</i>     | <i>SNCA</i>    |
| <i>TNRC4</i>     | <i>SNCG</i>    |
| <i>TOM1L1</i>    | <i>SNED1</i>   |
| <i>TOMM34</i>    | <i>SNF1LK</i>  |
| <i>TOMT</i>      | <i>SNRK</i>    |
| <i>TOP3A</i>     | <i>SNRPC</i>   |
| <i>TOR1AIP1</i>  | <i>SNRPD1</i>  |
| <i>TOX4</i>      | <i>SNRPD3</i>  |
| <i>TPD52L1</i>   | <i>SNRPE</i>   |
| <i>TPM2</i>      | <i>SNX1</i>    |
| <i>TPO</i>       | <i>SNX10</i>   |
| <i>TPPP3</i>     | <i>SNX12</i>   |
| <i>TPRGL</i>     | <i>SNX13</i>   |
| <i>TPRKB</i>     | <i>SNX16</i>   |
| <i>TPSB2</i>     | <i>SNX2</i>    |
| <i>TRAK2</i>     | <i>SNX20</i>   |
| <i>TREX1</i>     | <i>SNX21</i>   |
| <i>TRHR2</i>     | <i>SNX25</i>   |
| <i>TRIM11</i>    | <i>SNX31</i>   |
| <i>TRIM16</i>    | <i>SNX33</i>   |
| <i>TRIM31</i>    | <i>SNX9</i>    |
| <i>TRIM37</i>    | <i>SOAT2</i>   |
| <i>TRIM6</i>     | <i>SOCS1</i>   |
| <i>TRIML1</i>    | <i>SOCS3</i>   |
| <i>TRIT1</i>     | <i>SORBS2</i>  |
| <i>TRO</i>       | <i>SOS1</i>    |
| <i>TRP53INP2</i> | <i>SOX15</i>   |
| <i>TRUB1</i>     | <i>SOX6</i>    |

|                |                   |
|----------------|-------------------|
| <i>TSEN54</i>  | <i>SOX9</i>       |
| <i>TSHB</i>    | <i>SP140</i>      |
| <i>TSHR</i>    | <i>SP5</i>        |
| <i>TSN</i>     | <i>SPA17</i>      |
| <i>TSP50</i>   | <i>SPAG7</i>      |
| <i>TSPAN10</i> | <i>SPATA16</i>    |
| <i>TSPAN11</i> | <i>SPATA7</i>     |
| <i>TSPAN14</i> | <i>SPATS2</i>     |
| <i>TSPAN17</i> | <i>SPEF2</i>      |
| <i>TSPYL1</i>  | <i>SPEN</i>       |
| <i>TSPYL2</i>  | <i>SPERT</i>      |
| <i>TSPYL4</i>  | <i>SPHKAP</i>     |
| <i>TSR1</i>    | <i>SPINLW1</i>    |
| <i>TSSK1</i>   | <i>SPO11</i>      |
| <i>TSTA3</i>   | <i>SPON1</i>      |
| <i>TTC12</i>   | <i>SPON2</i>      |
| <i>TTC19</i>   | <i>SPRN</i>       |
| <i>TTC21B</i>  | <i>SPRYD3</i>     |
| <i>TTC39B</i>  | <i>SPSB1</i>      |
| <i>TLL6</i>    | <i>SPSB3</i>      |
| <i>TTPA</i>    | <i>SPTBN2</i>     |
| <i>TTR</i>     | <i>SPTBN4</i>     |
| <i>TTYH1</i>   | <i>SPTLC3</i>     |
| <i>TTYH2</i>   | <i>SQSTM1</i>     |
| <i>TUBA1A</i>  | <i>SR140</i>      |
| <i>TUBA1C</i>  | <i>SRC</i>        |
| <i>TUBA3B</i>  | <i>SRFBP1</i>     |
| <i>TUBA4A</i>  | <i>SRGAP1</i>     |
| <i>TUBB3</i>   | <i>SRGAP3</i>     |
| <i>TUBGCP5</i> | <i>SRP54</i>      |
| <i>TULP2</i>   | <i>SRP72</i>      |
| <i>TUT1</i>    | <i>SRPRB</i>      |
| <i>TXN1</i>    | <i>SRPX2</i>      |
| <i>TXNDC12</i> | <i>SS18L2</i>     |
| <i>TXNDC13</i> | <i>SSR3</i>       |
| <i>TXNDC16</i> | <i>SSTR1</i>      |
| <i>TXNDC4</i>  | <i>SSU72</i>      |
| <i>U2AF1</i>   | <i>SSX5</i>       |
| <i>UACA</i>    | <i>ST13</i>       |
| <i>UBAC1</i>   | <i>ST18</i>       |
| <i>UBE1Y1</i>  | <i>ST3GAL3</i>    |
| <i>UBE2A</i>   | <i>ST6GALNAC2</i> |
| <i>UBE2T</i>   | <i>STAB2</i>      |
| <i>UBE2U</i>   | <i>STAG3</i>      |
| <i>UBFD1</i>   | <i>STAMBP</i>     |
| <i>UBL4B</i>   | <i>STAP1</i>      |

|                 |                |
|-----------------|----------------|
| <i>UBN1</i>     | <i>STAR</i>    |
| <i>UBR2</i>     | <i>STARD3</i>  |
| <i>UBR7</i>     | <i>STATH</i>   |
| <i>UBTD1</i>    | <i>STAU1</i>   |
| <i>UBXN1</i>    | <i>STC1</i>    |
| <i>UCHL5IP</i>  | <i>STEAP1</i>  |
| <i>UCKL1</i>    | <i>STEAP3</i>  |
| <i>UFM1</i>     | <i>STK10</i>   |
| <i>UGCG</i>     | <i>STK17B</i>  |
| <i>UGP2</i>     | <i>STK19</i>   |
| <i>UGT2B34</i>  | <i>STK3</i>    |
| <i>UGT3A1</i>   | <i>STK33</i>   |
| <i>UHMK1</i>    | <i>STK35</i>   |
| <i>UHRF1</i>    | <i>STK38</i>   |
| <i>UHRF1BP1</i> | <i>STK4</i>    |
| <i>ULK1</i>     | <i>STMN3</i>   |
| <i>UMOD</i>     | <i>STOX2</i>   |
| <i>UNC119B</i>  | <i>STRA13</i>  |
| <i>UNC93B1</i>  | <i>STRAP</i>   |
| <i>UNG</i>      | <i>STX18</i>   |
| <i>UNK</i>      | <i>STX2</i>    |
| <i>UNKL</i>     | <i>STX4</i>    |
| <i>UPP1</i>     | <i>STX5</i>    |
| <i>UQCRC1</i>   | <i>STXBP1</i>  |
| <i>URM1</i>     | <i>SUGT1</i>   |
| <i>UROC1</i>    | <i>SULT1C2</i> |
| <i>UROS</i>     | <i>SUMF2</i>   |
| <i>USH1G</i>    | <i>SUOX</i>    |
| <i>USP12</i>    | <i>SURF1</i>   |
| <i>USP14</i>    | <i>SURF4</i>   |
| <i>USP32</i>    | <i>SUSD1</i>   |
| <i>USP37</i>    | <i>SUSD3</i>   |
| <i>USP43</i>    | <i>SV2A</i>    |
| <i>USP48</i>    | <i>SVIP</i>    |
| <i>USP6NL</i>   | <i>SYF2</i>    |
| <i>UTP15</i>    | <i>SYMPK</i>   |
| <i>UTS2</i>     | <i>SYN2</i>    |
| <i>UVRAG</i>    | <i>SYNC1</i>   |
| <i>UXT</i>      | <i>SYNCRIP</i> |
| <i>V1RD6</i>    | <i>SYNE1</i>   |
| <i>VAMP8</i>    | <i>SYNGR2</i>  |
| <i>VARS</i>     | <i>SYNGR3</i>  |
| <i>VAT1</i>     | <i>SYNJ1</i>   |
| <i>VEGFC</i>    | <i>SYNJ2</i>   |
| <i>VIP</i>      | <i>SYNPO2L</i> |
| <i>VIPR2</i>    | <i>SYT1</i>    |

|          |          |
|----------|----------|
| VIT      | SYT12    |
| VKORC1L1 | SYT17    |
| VPS24    | SYT8     |
| VPS28    | SYVN1    |
| VPS33A   | TAC4     |
| VPS33B   | TACC2    |
| VPS39    | TACC3    |
| VPS41    | TAF7L    |
| VPS4A    | TAL2     |
| VPS54    | TANK     |
| VRK1     | TARBP1   |
| VRK3     | TASP1    |
| VSX2     | TATDN2   |
| VTI1B    | TATDN3   |
| VWA2     | TBC1D1   |
| VWA5B2   | TBC1D10A |
| WAP      | TBC1D10B |
| WAPAL    | TBC1D12  |
| WARS2    | TBC1D15  |
| WAS      | TBC1D19  |
| WBP11    | TBCE     |
| WBSCR22  | TBKBP1   |
| WBSCR27  | TBL2     |
| WDR20B   | TBP      |
| WDR32    | TBX5     |
| WDR42A   | TCF25    |
| WDR45    | TCF7L2   |
| WDR59    | TCFL5    |
| WDR68    | TCP1     |
| WDR75    | TCTE1    |
| WDR82    | TCTE3    |
| WDR91    | TCTN3    |
| WDR92    | TDRD6    |
| WDR93    | TDRD7    |
| WDTC1    | TEKT4    |
| WEE1     | TENC1    |
| WHSC2    | TEX2     |
| WNT11    | TFAP2B   |
| WNT16    | TFAP2C   |
| WNT8A    | TFB2M    |
| WRNIP1   | TFCP2L1  |
| WSB2     | TFG      |
| WSCD1    | TGFBI    |
| WSCD2    | TGIF2    |
| WWP2     | TH1L     |
| XRCC5    | THAP7    |



|                |                 |
|----------------|-----------------|
| <i>XYLB</i>    | <i>THBD</i>     |
| <i>YIPF5</i>   | <i>THEM2</i>    |
| <i>YWHAB</i>   | <i>THNSL1</i>   |
| <i>ZBED3</i>   | <i>THOP1</i>    |
| <i>ZBED4</i>   | <i>THRAP3</i>   |
| <i>ZBP1</i>    | <i>THSD3</i>    |
| <i>ZBTB1</i>   | <i>THUMPD1</i>  |
| <i>ZBTB45</i>  | <i>THUMPD3</i>  |
| <i>ZBTB7B</i>  | <i>THYN1</i>    |
| <i>ZBTB80S</i> | <i>TICAM1</i>   |
| <i>ZC3H3</i>   | <i>TIFAB</i>    |
| <i>ZC3HC1</i>  | <i>TIGD1</i>    |
| <i>ZCCHC17</i> | <i>TIGD5</i>    |
| <i>ZCCHC3</i>  | <i>TIMM17B</i>  |
| <i>ZCCHC6</i>  | <i>TIPIN</i>    |
| <i>ZCCHC9</i>  | <i>TJAP1</i>    |
| <i>ZDHHC11</i> | <i>TJP2</i>     |
| <i>ZDHHC16</i> | <i>TK2</i>      |
| <i>ZDHHC20</i> | <i>TKTL1</i>    |
| <i>ZER1</i>    | <i>TKTL2</i>    |
| <i>ZFAND2B</i> | <i>TLX2</i>     |
| <i>ZFAND3</i>  | <i>TM4SF20</i>  |
| <i>ZFHX4</i>   | <i>TM6SF1</i>   |
| <i>ZFP106</i>  | <i>TM6SF2</i>   |
| <i>ZFP109</i>  | <i>TM7SF4</i>   |
| <i>ZFP110</i>  | <i>TM9SF3</i>   |
| <i>ZFP148</i>  | <i>TM9SF4</i>   |
| <i>ZFP157</i>  | <i>TMC8</i>     |
| <i>ZFP161</i>  | <i>TMCC1</i>    |
| <i>ZFP217</i>  | <i>TMCC3</i>    |
| <i>ZFP238</i>  | <i>TMED7</i>    |
| <i>ZFP281</i>  | <i>TMEFF1</i>   |
| <i>ZFP316</i>  | <i>TMEM102</i>  |
| <i>ZFP330</i>  | <i>TMEM103</i>  |
| <i>ZFP341</i>  | <i>TMEM121</i>  |
| <i>ZFP352</i>  | <i>TMEM127</i>  |
| <i>ZFP362</i>  | <i>TMEM128</i>  |
| <i>ZFP365</i>  | <i>TMEM141</i>  |
| <i>ZFP36L1</i> | <i>TMEM151A</i> |
| <i>ZFP385C</i> | <i>TMEM165</i>  |
| <i>ZFP418</i>  | <i>TMEM16F</i>  |
| <i>ZFP438</i>  | <i>TMEM170</i>  |
| <i>ZFP456</i>  | <i>TMEM173</i>  |
| <i>ZFP498</i>  | <i>TMEM174</i>  |
| <i>ZFP512</i>  | <i>TMEM176B</i> |
| <i>ZFP560</i>  | <i>TMEM177</i>  |

|         |           |
|---------|-----------|
| ZFP568  | TMEM184B  |
| ZFP575  | TMEM187   |
| ZFP595  | TMEM205   |
| ZFP598  | TMEM22    |
| ZFP608  | TMEM43    |
| ZFP619  | TMEM54    |
| ZFP644  | TMEM55A   |
| ZFP664  | TMEM59L   |
| ZFP68   | TMEM62    |
| ZFP691  | TMEM80    |
| ZFP7    | TMEM86B   |
| ZFP715  | TMEM97    |
| ZFP748  | TMF1      |
| ZFP770  | TMPRSS4   |
| ZFP777  | TMUB1     |
| ZFP784  | TNFAIP1   |
| ZFP809  | TNFAIP6   |
| ZFP828  | TNFRSF10B |
| ZFP830  | TNFRSF10C |
| ZFP91   | TNFRSF10D |
| ZFP94   | TNFRSF13B |
| ZFYVE1  | TNFRSF14  |
| ZFYVE20 | TNFRSF6B  |
| ZMAT3   | TNFSF10   |
| ZNHIT3  | TNFSF13B  |
| ZNRF1   | TNIP2     |
| ZRANB3  | TNKS2     |
| ZUFSP   | TNN       |
| ZW10    | TNNC2     |
| ZXDB    | TNRC4     |
| ZYG11B  | TNRC6C    |
| ZYX     | TNXB      |
|         | TOM1      |
|         | TOMM20    |
|         | TOMM34    |
|         | TOR1AIP1  |
|         | TPCN1     |
|         | TPP2      |
|         | TPPP2     |
|         | TPRG1L    |
|         | TRADD     |
|         | TRAF1     |
|         | TRAF3IP1  |
|         | TRAF5     |
|         | TRAF6     |
|         | TRAM2     |

TRAPPC2L  
TRAPPC6B  
TRDN  
TRIM10  
TRIM21  
TRIM32  
TRIM41  
TRIM44  
TRIM46  
TRIM5  
TRIM56  
TRIM6  
TRIOBP  
TRIP11  
TRIP6  
TRMT1  
TRMT5  
TRMT6  
TRMU  
TRO  
TRPA1  
TRPM7  
TRPV4  
TRSPAP1  
TSC1  
TSC2  
TSFM  
TSGA13  
TSHB  
TSKU  
TSLP  
TSN  
TSNARE1  
TSP50  
TSPYL2  
TSPYL4  
TSR2  
TSSC4  
TSSK6  
TTC1  
TTC23  
TTC26  
TTC29  
TTC31  
TTC5  
TTC8

TTC9C  
TTF2  
TTLL12  
TTLL4  
TTLL5  
TTLL7  
TUBA1A  
TUBB2A  
TUBB6  
TUBE1  
TULP3  
TUSC3  
TUT1  
TWF2  
TXLNA  
TXN2  
TXNDC12  
TXNDC13  
TXNDC4  
U1SNRNPBP  
UACA  
UAP1L1  
UBA1  
UBA52  
UBAC1  
UBAP1  
UBASH3A  
UBC  
UBE2G2  
UBE2I  
UBN1  
UBQLNL  
UCN2  
UCP2  
UCP3  
UGP2  
UGT1A6  
UGT1A8  
UGT2A3  
UHRF1BP1  
ULBP1  
UMOD  
UNC119B  
UNC13B  
UNC45B  
UNC93B1

UNK  
UPK1A  
UQCRC1  
USF1  
USP13  
USP14  
USP31  
USP32  
USP4  
USP44  
USP46  
USP48  
USP5  
USP6  
USP7  
USP8  
USP9Y  
UTF1  
UTP15  
UTS2D  
VAMP3  
VAMP8  
VARS  
VAT1  
VCL  
VGLL3  
VGLL4  
VIT  
VKORC1  
VPRBP  
VPS24  
VPS29  
VPS33B  
VPS37A  
VPS39  
VPS8  
VSIG1  
VSIG4  
VTI1B  
VWA3B  
VWF  
WARS2  
WBP11  
WDFY4  
WDR13  
WDR26

WDR31  
WDR33  
WDR37  
WDR47  
WDR59  
WDR6  
WDR62  
WDR81  
WDR85  
WDR91  
WDR92  
WDSOF1  
WDTC1  
WFDC1  
WFDC10A  
WFDC12  
WFDC5  
WFDC8  
WHSC1L1  
WIBG  
WIPF1  
WISP1  
WNT4  
WNT8A  
WNT9B  
WRNIP1  
WSCD2  
WWC1  
XBP1  
XPO4  
XPO5  
XPO6  
XYLB  
XYLT1  
YDJC  
YIF1A  
YIF1B  
YPEL3  
YPEL5  
YTHDC1  
YTHDC2  
YWHAB  
YWHAZ  
ZBTB25  
ZBTB46  
ZBTB5

ZBTB7A  
ZBTB7B  
ZC3H11A  
ZC3H12A  
ZC3H3  
ZC3H7A  
ZCCHC2  
ZCCHC9  
ZDHHC16  
ZDHHC17  
ZDHHC19  
ZDHHC22  
ZDHHC3  
ZDHHC6  
ZDHHC7  
ZFHX3  
ZFHX4  
ZFP1  
ZFP28  
ZFP30  
ZFP36L1  
ZFP91  
ZFYVE16  
ZFYVE26  
ZFYVE9  
ZIC1  
ZIC5  
ZIK1  
ZIM2  
ZMYM4  
ZNF114  
ZNF124  
ZNF132  
ZNF135  
ZNF148  
ZNF16  
ZNF169  
ZNF175  
ZNF187  
ZNF193  
ZNF20  
ZNF202  
ZNF211  
ZNF224  
ZNF233  
ZNF238

ZNF264  
ZNF274  
ZNF275  
ZNF277  
ZNF280D  
ZNF281  
ZNF285A  
ZNF317  
ZNF346  
ZNF35  
ZNF358  
ZNF362  
ZNF385D  
ZNF474  
ZNF498  
ZNF544  
ZNF546  
ZNF566  
ZNF570  
ZNF573  
ZNF594  
ZNF598  
ZNF608  
ZNF622  
ZNF628  
ZNF689  
ZNF691  
ZNF695  
ZNF701  
ZNF711  
ZNF746  
ZNF766  
ZNF789  
ZNF83  
ZNF831  
ZNF84  
ZNHIT3  
ZNRF1  
ZNRF3  
ZPLD1  
ZRANB1  
ZSCAN1  
ZSWIM3  
ZSWIM7  
ZYG  
ZZEF1
